# Supplementary material for: Ag(i)-catalyzed tandem [6+3] annulation/isomerization of isocyanoacetates with fulvenes: an expedient approach to synthesize fused dihydropyridines
Source: Royal Society of Chemistry journal article supplement (doi:10.1039/c4cc08382b), 2014-11-19
Supplement: c4cc08382b1.pdf [file c4cc08382b1.pdf]

*Supporting Information for*

**Ag(I)-Catalyzed Tandem [6 + 3] Annulation/Isomerization of  
Isocyanoacetates with Fulvenes: An Expedient Approach to Fused  
Dihydropyridines**

Zhao-Lin He, Chun-Jiang Wang\*

*E-mail:* cjwang@whu.edu.cn

Table of Contents

|      |                                                                                                                                                |         |
|------|------------------------------------------------------------------------------------------------------------------------------------------------|---------|
| I.   | General Remarks.....                                                                                                                           | S2      |
| II.  | General Procedure for Ag(I)-Catalyzed [6 + 3] Cycloaddition/Isomerization of<br>Isocyanoacetates <b>1</b> with Fulvenes <b>2</b> .....         | S2-S10  |
| III. | Preliminary Results for Catalytic asymmetric [6 + 3] Cycloaddition/Isomer-ization of<br>Isocyanoacetate <b>1a</b> with Fulvene <b>2a</b> ..... | S11     |
| IV.  | References.....                                                                                                                                | S11     |
| V.   | <sup>1</sup> H NMR and <sup>13</sup> C NMR Spectra.....                                                                                        | S12-S51 |
| VI.  | HPLC Chromatograms.....                                                                                                                        | S52-S53 |

## I. General Remarks

<sup>1</sup>H NMR spectra were recorded on a VARIAN Mercury 300 MHz or Bruker 400 MHz spectrometer in CDCl<sub>3</sub>. Chemical shifts are reported in ppm with the internal TMS signal at 0.0 ppm as a standard. The data are reported as (s = single, d = double, t = triple, q = quarte, m = multiple or unresolved, brs = broad single, coupling constant(s) in Hz, integration). <sup>13</sup>C NMR spectra were recorded on a VARIAN Mercury 75 MHz or Bruker 100 MHz spectrometer in CDCl<sub>3</sub>. Chemical shifts are reported in ppm with the internal chloroform signal at 77.0 ppm as a standard. Commercially obtained reagents were used without further purification. All reactions were monitored by TLC with silica gel-coated plates. Enantiomeric ratios were determined by HPLC, using a chiralpak AS-H column with hexane and *i*-PrOH as solvents. Fulvenes<sup>1</sup> and isocyanoacetates<sup>2</sup> were prepared according to the literature procedure. Chiral ligand TF-BiphamPhos was prepared according our previous procedure.<sup>3</sup>

## II. General Procedure for Ag(I)-Catalyzed [6 + 3] Cycloaddition/Isomerization of Isocyanoacetates **1** with Fulvenes **2**

Under argon atmosphere, AgOAc (2.0 mg, 0.012 mmol) and PPh<sub>3</sub> (6.9 mg, 0.026 mmol) were dissolved in 2 mL DCM, and stirred at room temperature for about 30 min. Then, isocyanoacetate **2** (0.4 mmol), Et<sub>3</sub>N (0.06 mmol) and fulvene **1** (0.6 mmol) was added sequentially. Once starting material was consumed (monitored by TLC), then the organic solvent was removed and the residue was purified by column chromatography to give the product.

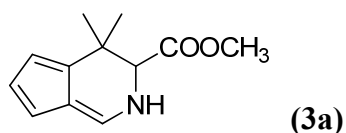

### Methyl 4,4-dimethyl-3,4-dihydro-2H-cyclopenta[c]pyridine-3-carboxylate

The title compound was prepared according to the general procedure as described above in 90% yield. <sup>1</sup>H NMR (CDCl<sub>3</sub>, TMS, 300 MHz) δ 7.29 (d, *J* = 5.7 Hz, 1H), 6.28 (m, 2H), 6.08 (s, 1H), 5.82 (br, 1H), 4.13 (s, 1H), 3.85 (s, 3H), 1.56 (s, 3H), 1.01 (s, 3H); <sup>13</sup>C NMR (CDCl<sub>3</sub>, TMS, 75 MHz) δ 171.1, 139.4, 135.1, 124.2, 116.2, 114.7, 65.6, 52.4, 36.8, 25.1, 24.0; HRMS Calcd.

For  $C_{12}H_{15}NO_2^+$ : 205.1103, found: 205.1104.

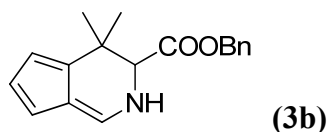

**Benzyl 4,4-dimethyl-3,4-dihydro-2H-cyclopenta[c]pyridine-3-carboxylate**

The title compound was prepared according to the general procedure as described above in 95% yield.  $^1H$  NMR ( $CDCl_3$ , TMS, 300 MHz)  $\delta$  7.40-7.33 (m, 5H), 7.28-7.25 (m, 1H), 6.26 (s, 2H), 6.05 (s, 1H), 5.81 (br, 1H), 5.32 (d,  $J = 12.0$  Hz, 1H), 5.22 (d,  $J = 12.0$  Hz, 1H), 4.14 (s, 1H), 1.53 (s, 3H), 0.97 (s, 3H);  $^{13}C$  NMR ( $CDCl_3$ , TMS, 75 MHz)  $\delta$  172.0, 139.5, 135.0, 124.0, 117.5, 116.1, 114.6, 65.6, 52.3, 36.7, 25.2, 24.0; HRMS Calcd. For  $C_{18}H_{19}NO_2^+$ : 281.1416, found: 281.1414.

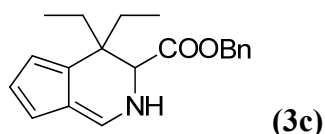

**Benzyl 4,4-diethyl-3,4-dihydro-2H-cyclopenta[c]pyridine-3-carboxylate**

The title compound was prepared according to the general procedure as described above in 78% yield.  $^1H$  NMR ( $CDCl_3$ , TMS, 300 MHz)  $\delta$  7.39 (m, 5H), 7.20 (d,  $J = 6.0$  Hz, 1H), 6.29-6.28 (m, 2H), 5.97 (s, 1H), 5.70 (br, 1H), 4.50 (s, 1H), 2.09-2.02 (m, 1H), 1.75-1.57 (m, 3H), 1.07 (t,  $J = 7.5$  Hz, 3H), 0.64 (t,  $J = 7.5$  Hz, 3H);  $^{13}C$  NMR ( $CDCl_3$ , TMS, 75 MHz)  $\delta$  170.7, 138.9, 134.8, 133.7, 133.5, 128.6, 128.3, 123.7, 118.8, 117.4, 116.3, 67.4, 61.3, 44.7, 27.7, 26.0, 8.8, 8.0; HRMS Calcd. For  $C_{20}H_{23}NO_2^+$ : 309.1731, found: 309.1729.

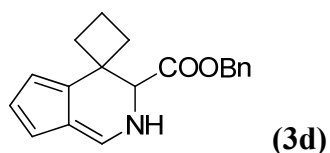

**Benzyl 2',3'-dihydrospiro[cyclobutane-1,4'-cyclopenta[c]pyridine]-3'-carboxylate**

The title compound was prepared according to the general procedure as described above in 81% yield.  $^1H$  NMR ( $CDCl_3$ , TMS, 300 MHz)  $\delta$  7.35 (m, 5H), 7.22 (d,  $J = 6.0$  Hz, 1H), 6.30-6.23 (m, 3H), 5.49 (br, 1H), 5.23 (dd,  $J_1 = 12.0$  Hz,  $J_2 = 16.8$  Hz, 2H), 4.14 (s, 1H), 2.58-2.51 (m,

1H), 2.35-2.21 (m, 2H), 2.06-2.02 (m, 1H), 1.74-1.68 (m, 1H), 1.03 (t,  $J = 7.2$  Hz, 1H);  $^{13}\text{C}$  NMR ( $\text{CDCl}_3$ , TMS, 75 MHz)  $\delta$  170.8, 140.2, 135.0, 133.6, 128.5, 128.4, 128.3, 124.3, 118.1, 116.7, 114.9, 67.4, 64.2, 42.4, 31.9, 29.9, 15.2.

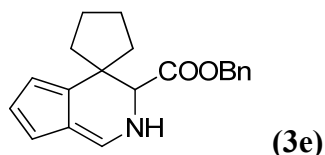

**Benzyl 2,3-dihydrospiro[cyclopenta[c]pyridine-4,1'-cyclopentane]-3-carboxylate**

The title compound was prepared according to the general procedure as described above in 86% yield.  $^1\text{H}$  NMR ( $\text{CDCl}_3$ , TMS, 300 MHz)  $\delta$  7.38-7.34 (m, 5H), 7.25-7.23 (m, 1H), 6.25 (m, 2H), 5.97 (s, 1H), 5.69 (br, 1H), 5.25-5.22 (m, 2H), 4.27 (s, 1H), 2.28-2.25 (m, 1H), 2.02-2.00 (m, 1H), 1.67-1.45 (m, 6H);  $^{13}\text{C}$  NMR ( $\text{CDCl}_3$ , TMS, 75 MHz)  $\delta$  171.9, 139.6, 135.8, 134.8, 133.7, 128.4, 123.8, 117.9, 116.4, 115.5, 88.2, 67.4, 64.3, 47.9, 36.5, 34.9, 25.2.

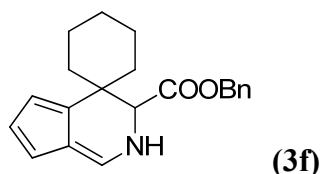

**Benzyl 2',3'-dihydrospiro[cyclohexane-1,4'-cyclopenta[c]pyridine]-3'-carboxylate**

The title compound was prepared according to the general procedure as described above in 78% yield.  $^1\text{H}$  NMR ( $\text{CDCl}_3$ , TMS, 300 MHz)  $\delta$  7.38-7.25 (m, 5H), 7.15-7.13 (m, 1H), 6.25 (m, 2H), 6.17 (s, 1H), 5.31 (br, 1H), 5.14 (dd,  $J_1 = 12.6$  Hz,  $J_2 = 14.7$  Hz, 2H), 4.20-4.19 (m, 1H), 1.94-1.40 (m, 10H);  $^{13}\text{C}$  NMR ( $\text{CDCl}_3$ , TMS, 75 MHz)  $\delta$  170.7, 139.2, 135.1, 133.3, 128.4, 128.2, 128.1, 123.4, 118.4, 117.2, 116.5, 66.7, 62.1, 39.5, 36.4, 31.4, 25.7, 22.5, 21.8; HRMS Calcd. For  $\text{C}_{21}\text{H}_{23}\text{NO}_2^+$ : 321.1739, found: 321.1729.

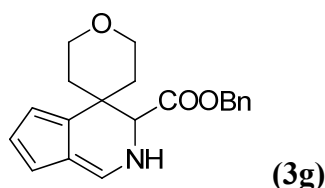

**Benzyl 2,2',3,3',5',6'-hexahydrospiro[cyclopenta[c]pyridine-4,4'-pyran]-3-carboxylate**

The title compound was prepared according to the general procedure as described above in 67% yield.  $^1\text{H}$  NMR ( $\text{CDCl}_3$ , TMS, 300 MHz)  $\delta$  7.35-7.26 (m, 5H), 7.18 (d,  $J$  = 5.7 Hz, 1H), 6.28-6.27 (m, 3H), 5.45 (br, 1H), 5.22 (d,  $J$  = 6.3 Hz, 1H), 5.12 (d,  $J$  = 6.3 Hz, 1H), 4.17-4.16 (m, 1H), 3.88-3.74 (m, 4H), 2.12-2.08 (m, 1H), 1.83-1.66 (m, 3H);  $^{13}\text{C}$  NMR ( $\text{CDCl}_3$ , TMS, 75 MHz)  $\delta$  169.9, 139.3, 128.5, 128.1, 123.6, 118.7, 117.0, 67.1, 64.3, 64.1, 46.0, 37.5, 35.4, 31.6; HRMS Calcd. For  $\text{C}_{20}\text{H}_{21}\text{NO}_3^+$ : 323.1528, found: 323.1525.

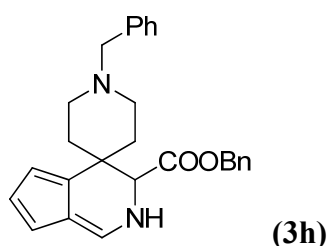

**Benzyl 1'-benzyl-2,3-dihydrospiro[cyclopenta[c]pyridine-4,4'-piperidine]-3-carboxylate**

The title compound was prepared according to the general procedure as described above in 75% yield.  $^1\text{H}$  NMR ( $\text{CDCl}_3$ , TMS, 300 MHz)  $\delta$  7.39-7.26 (m, 10H), 7.15 (d,  $J$  = 5.1 Hz, 1H), 6.25-6.20 (m, 3H), 5.35 (br, 1H), 5.14 (dd,  $J_1$  = 12.3 Hz,  $J_2$  = 24.3 Hz, 2H), 4.18-4.17 (m, 1H), 3.53 (m, 2H), 2.55-2.52 (m, 4H), 2.08-1.98 (m, 2H), 1.77-1.72 (m, 2H);  $^{13}\text{C}$  NMR ( $\text{CDCl}_3$ , TMS, 75 MHz)  $\delta$  170.3, 139.0, 133.9, 133.7, 129.5, 129.2, 128.7, 128.54, 128.49, 128.2, 128.1, 128.0, 126.9, 123.7, 116.9, 66.9, 63.2, 50.0, 49.7, 37.9, 35.4, 31.2; HRMS Calcd. For  $\text{C}_{27}\text{H}_{28}\text{N}_2\text{O}_2^+$ : 412.2151, found: 412.2155.

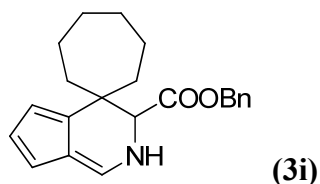

**Benzyl 2',3'-dihydrospiro[cycloheptane-1,4'-cyclopenta[c]pyridine]-3'-carboxylate**

The title compound was prepared according to the general procedure as described above in 77% yield.  $^1\text{H}$  NMR ( $\text{CDCl}_3$ , TMS, 300 MHz)  $\delta$  7.37 (m, 5H), 7.19 (d,  $J$  = 6.0 Hz, 1H), 6.26-6.25 (m, 2H), 6.14 (m, 1H), 5.60 (br, 1H), 5.30 (d,  $J$  = 12.3 Hz, 1H), 5.15 (d,  $J$  = 12.3 Hz, 1H), 4.17 (s, 1H), 2.23-2.20 (m, 1H), 2.06-1.98 (m, 1H), 1.66-1.26 (m, 10H);  $^{13}\text{C}$  NMR ( $\text{CDCl}_3$ , TMS, 75 MHz)  $\delta$  171.0, 155.6, 138.9, 135.3, 131.9, 128.6, 123.7, 118.3, 117.2, 116.8, 67.4, 67.0,

44.4, 37.8, 32.3, 31.9, 24.8, 22.9.

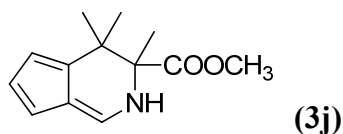

**Methyl 3,4,4-trimethyl-3,4-dihydro-2H-cyclopenta[c]pyridine-3-carboxylate**

The title compound was prepared according to the general procedure as described above in 81% yield. <sup>1</sup>H NMR (CDCl<sub>3</sub>, TMS, 300 MHz) δ 7.13 (d, *J* = 6.3 Hz, 1H), 6.24 (m, 2H), 6.07 (s, 1H), 5.94 (br, 1H), 3.84 (s, 3H), 1.51 (m, 6H), 1.09 (s, 3H); <sup>13</sup>C NMR (CDCl<sub>3</sub>, TMS, 75 MHz) δ 174.4, 137.6, 134.5, 123.5, 116.4, 116.0, 155.8, 67.5, 52.6, 39.3, 26.8, 21.7, 19.1; HRMS Calcd. For C<sub>13</sub>H<sub>17</sub>NO<sub>2</sub><sup>+</sup>: 219.1259, found: 219.1255.

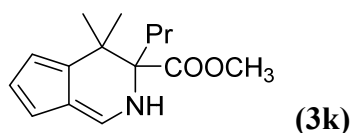

**Methyl 4,4-dimethyl-3-propyl-3,4-dihydro-2H-cyclopenta[c]pyridine-3-carboxylate**

The title compound was prepared according to the general procedure as described above in 73% yield. <sup>1</sup>H NMR (CDCl<sub>3</sub>, TMS, 300 MHz) δ 7.12 (d, *J* = 5.7 Hz, 1H), 6.23 (m, 2H), 6.04 (s, 1H), 5.98 (br, 1H), 3.84 (s, 3H), 2.13-2.12 (m, 1H), 1.88-1.78 (m, 1H), 1.51 (m, 3H), 1.28-1.21 (m, 1H), 1.07 (s, 3H), 0.84 (t, *J* = 6.9 Hz, 3H); <sup>13</sup>C NMR (CDCl<sub>3</sub>, TMS, 75 MHz) δ 173.8, 137.2, 135.0, 128.7, 123.4, 116.0, 155.5, 71.2, 52.5, 39.6, 31.8, 27.3, 18.2, 13.9.

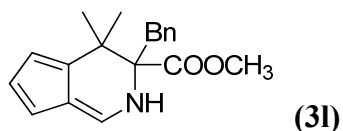

**Methyl 3-benzyl-4,4-dimethyl-3,4-dihydro-2H-cyclopenta[c]pyridine-3-carboxylate**

The title compound was prepared according to the general procedure as described above in 72% yield. <sup>1</sup>H NMR (CDCl<sub>3</sub>, TMS, 300 MHz) δ 7.32-7.23 (m, 2H), 7.13 (d, *J* = 6.0 Hz, 1H), 6.96-6.94 (m, 2H), 6.30 (m, 2H), 6.12 (s, 1H), 5.49-5.47 (m, 1H), 3.82 (s, 3H), 3.37 (d, *J* = 13.2 Hz, 1H), 3.22 (d, *J* = 13.2 Hz, 1H), 1.65 (m, 3H), 1.11 (s, 3H); <sup>13</sup>C NMR (CDCl<sub>3</sub>, TMS, 75 MHz) δ 172.5, 137.1, 136.4, 129.7, 128.2, 126.6, 123.7, 117.2, 116.3, 116.2, 72.1, 52.3, 40.1, 34.9,

27.3, 21.4.

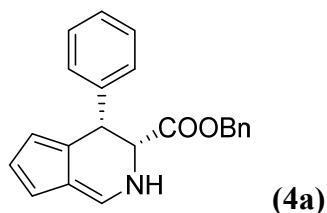

**Benzyl 4-phenyl-3,4-dihydro-2H-cyclopenta[c]pyridine-3-carboxylate**

The title compound was prepared according to the general procedure as described above in 32% yield.  $^1\text{H}$  NMR ( $\text{CDCl}_3$ , TMS, 300 MHz)  $\delta$  7.35-7.18 (m, 8H), 7.08-7.07 (m, 2H), 6.37-6.35 (m, 1H), 6.31-6.29 (m, 1H), 5.81 (s, 1H), 5.46 (br, 1H), 5.06 (dd,  $J_1 = 12.3$  Hz,  $J_2 = 22.5$  Hz, 2H), 4.57 (d,  $J = 7.8$  Hz, 1H), 4.30 (d,  $J = 7.8$  Hz, 1H);  $^{13}\text{C}$  NMR ( $\text{CDCl}_3$ , TMS, 75 MHz)  $\delta$  170.9, 140.9, 140.5, 134.8, 128.4, 128.3, 128.1, 128.0, 126.8, 125.9, 124.8, 119.9, 117.0, 67.4, 62.4, 44.7; For  $\text{C}_{22}\text{H}_{19}\text{NO}_2^+$ : 329.1423, found: 329.1420.

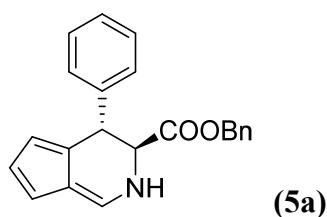

**Benzyl 4-phenyl-3,4-dihydro-2H-cyclopenta[c]pyridine-3-carboxylate**

The title compound was prepared according to the general procedure as described above in 32% yield.  $^1\text{H}$  NMR ( $\text{CDCl}_3$ , TMS, 300 MHz)  $\delta$  7.46-7.26 (m, 5H), 7.13-7.11 (m, 3H), 6.93-6.92 (m, 2H), 6.38-6.37 (m, 1H), 6.31 (m, 1H), 5.97 (s, 1H), 5.81 (br, 1H), 5.08 (dd,  $J_1 = 12.0$  Hz,  $J_2 = 17.1$  Hz, 2H), 4.71 (d,  $J = 5.4$  Hz, 1H), 4.55 (d,  $J = 5.4$  Hz, 1H);  $^{13}\text{C}$  NMR ( $\text{CDCl}_3$ , TMS, 75 MHz)  $\delta$  169.6, 140.2, 139.5, 134.5, 132.0, 128.8, 128.7, 128.2, 127.9, 127.0, 126.8, 125.1, 120.2, 118.5, 116.4, 67.5, 60.6, 43.5; HRMS Calcd. For  $\text{C}_{22}\text{H}_{19}\text{NO}_2^+$ : 329.1416, found: 329.1413.

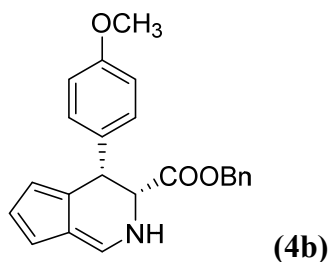

**Benzyl 4-(4-methoxyphenyl)-3,4-dihydro-2H-cyclopenta[c]pyridine-3-carboxylate**

The title compound was prepared according to the general procedure as described above in 35% yield.  $^1\text{H}$  NMR ( $\text{CDCl}_3$ , TMS, 300 MHz)  $\delta$  7.34-7.29 (m, 4H), 7.13-7.08 (m, 3H), 6.80 (d,  $J$  = 8.4 Hz, 2H), 6.36-6.35 (m, 1H), 6.31-6.29 (m, 1H), 5.80 (s, 1H), 5.51 (br, 1H), 5.05 (dd,  $J_1$  = 12.3 Hz,  $J_2$  = 15.0 Hz, 2H), 4.50 (d,  $J$  = 8.1 Hz, 1H), 4.26 (d,  $J$  = 8.1 Hz, 1H), 3.78 (s, 3H);  $^{13}\text{C}$  NMR ( $\text{CDCl}_3$ , TMS, 75 MHz)  $\delta$  171.0, 158.4, 140.4, 134.8, 133.7, 129.2, 128.4, 128.3, 128.0, 126.5, 124.8, 120.1, 119.8, 117.0, 113.7, 67.3, 62.8, 55.1, 44.2; HRMS Calcd. For  $\text{C}_{23}\text{H}_{21}\text{NO}_3$  $^+$ : 359.1521, found: 359.1522.

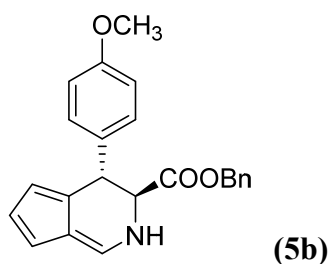

**Benzyl 4-(4-methoxyphenyl)-3,4-dihydro-2H-cyclopenta[c]pyridine-3-carboxylate**

The title compound was prepared according to the general procedure as described above in 35% yield.  $^1\text{H}$  NMR ( $\text{CDCl}_3$ , TMS, 300 MHz)  $\delta$  7.40-7.30 (m, 5H), 6.82 (d,  $J$  = 8.7 Hz, 2H), 6.62 (d,  $J$  = 8.7 Hz, 2H), 6.36-6.35 (m, 1H), 6.31-6.28 (m, 1H), 5.95 (s, 1H), 5.86-5.84 (m, 1H), 5.09 (dd,  $J_1$  = 12.3 Hz,  $J_2$  = 13.8 Hz, 2H), 4.66 (d,  $J$  = 5.1 Hz, 1H), 4.51 (d,  $J$  = 5.1 Hz, 1H), 3.71 (s, 3H);  $^{13}\text{C}$  NMR ( $\text{CDCl}_3$ , TMS, 75 MHz)  $\delta$  169.7, 158.2, 140.1, 134.6, 131.7, 128.9, 128.8, 128.7, 128.5, 127.4, 125.1, 120.1, 118.2, 116.3, 113.5, 67.5, 60.7, 55.0, 42.7; HRMS Calcd. For  $\text{C}_{23}\text{H}_{21}\text{NO}_3$  $^+$ : 359.1521, found: 359.1516.



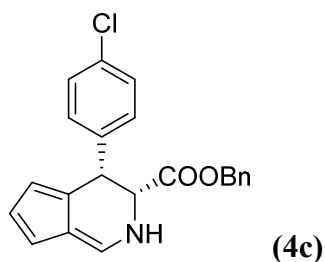

**Benzyl 4-(4-chlorophenyl)-3,4-dihydro-2H-cyclopenta[c]pyridine-3-carboxylate**

The title compound was prepared according to the general procedure as described above in 40% yield.  $^1\text{H}$  NMR ( $\text{CDCl}_3$ , TMS, 300 MHz)  $\delta$  7.36-7.31 (m, 3H), 7.21 (d,  $J = 8.4$  Hz, 2H), 7.13 (d,  $J = 8.4$  Hz, 2H), 7.06 (m, 2H), 6.37-6.35 (m, 1H), 6.30-6.26 (m, 1H), 5.76 (s, 1H), 5.54 (br, 1H), 5.05 (m, 2H), 4.49 (d,  $J = 8.4$  Hz, 1H), 4.27 (d,  $J = 8.4$  Hz, 1H);  $^{13}\text{C}$  NMR ( $\text{CDCl}_3$ , TMS, 75 MHz)  $\delta$  170.6, 140.4, 140.2, 134.5, 132.6, 129.6, 128.5, 128.1, 125.8, 124.9, 120.1, 117.2, 67.6, 62.3, 44.4; HRMS Calcd. For  $\text{C}_{22}\text{H}_{18}\text{ClNO}_2^+$ : 363.1026, found: 363.1029.

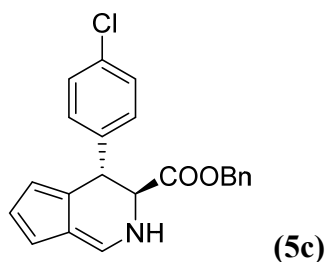

**Benzyl 4-(4-chlorophenyl)-3,4-dihydro-2H-cyclopenta[c]pyridine-3-carboxylate**

The title compound was prepared according to the general procedure as described above in 40% yield.  $^1\text{H}$  NMR ( $\text{CDCl}_3$ , TMS, 300 MHz)  $\delta$  7.45-7.26 (m, 5H), 7.03 (d,  $J = 8.4$  Hz, 2H), 6.82 (d,  $J = 8.4$  Hz, 2H), 6.38-6.36 (m, 1H), 6.31-6.30 (m, 1H), 5.95 (s, 1H), 5.83 (br, 1H), 5.10 (dd,  $J_1 = 12.0$  Hz,  $J_2 = 16.2$  Hz, 2H), 4.69 (d,  $J = 5.1$  Hz, 1H), 4.51 (d,  $J = 5.1$  Hz, 1H);  $^{13}\text{C}$  NMR ( $\text{CDCl}_3$ , TMS, 75 MHz)  $\delta$  169.3, 140.1, 138.0, 134.3, 133.5, 132.4, 129.2, 128.9, 128.7, 128.3, 126.5, 125.2, 120.0, 118.7, 116.7, 67.7, 60.3, 42.7; HRMS Calcd. For  $\text{C}_{22}\text{H}_{18}\text{ClNO}_2^+$ : 363.1026, found: 363.1027.

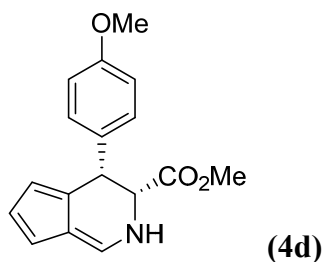

**Methyl 4-(4-methoxyphenyl)-3,4-dihydro-2H-cyclopenta[c]pyridine-3-carboxylate**

The title compound was prepared according to the general procedure as described above in 35% yield. <sup>1</sup>H NMR (CDCl<sub>3</sub>, TMS, 300 MHz) δ 7.34 (d, *J* = 6.0 Hz, 1H), 7.12 (d, *J* = 8.1 Hz, 2H), 6.83 (d, *J* = 9.0 Hz, 2H), 6.35-6.31 (m, 1H), 6.30-6.29 (m, 1H), 5.84 (s, 1H), 5.47-5.46 (br, 1H), 4.52 (d, *J* = 5.1 Hz, 1H), 4.20-4.17 (m, 1H), 3.78 (s, 3H), 3.64 (s, 3H); <sup>13</sup>C NMR (CDCl<sub>3</sub>, TMS, 75 MHz) δ 171.5, 158.4, 140.5, 134.1, 129.0, 126.1, 124.7, 119.9, 119.6, 116.9, 113.6, 62.6, 55.1, 52.6, 43.8.

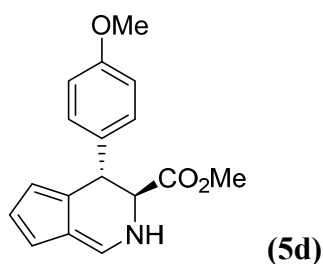

**Methyl 4-(4-methoxyphenyl)-3,4-dihydro-2H-cyclopenta[c]pyridine-3-carboxylate**

The title compound was prepared according to the general procedure as described above in 35% yield. <sup>1</sup>H NMR (CDCl<sub>3</sub>, TMS, 300 MHz) δ 7.42 (d, *J* = 6.0 Hz, 1H), 6.88 (d, *J* = 9.0 Hz, 2H), 6.71 (d, *J* = 8.7 Hz, 2H), 6.38-6.33 (m, 1H), 6.32-6.31 (m, 1H), 5.99 (s, 1H), 5.82-5.80 (m, 1H), 4.64 (d, *J* = 5.1 Hz, 1H), 4.52 (d, *J* = 5.4 Hz, 1H), 3.72 (m, 6H); <sup>13</sup>C NMR (CDCl<sub>3</sub>, TMS, 75 MHz) δ 170.3, 158.3, 140.3, 131.8, 128.8, 127.2, 125.0, 120.1, 118.1, 116.2, 113.5, 60.7, 55.0, 52.3, 42.7.

### III. Preliminary Results for Catalytic asymmetric [6 + 3] Cycloaddition/Isomer-ization of Isocyanoacetate **1a** with Fulvene **2a**

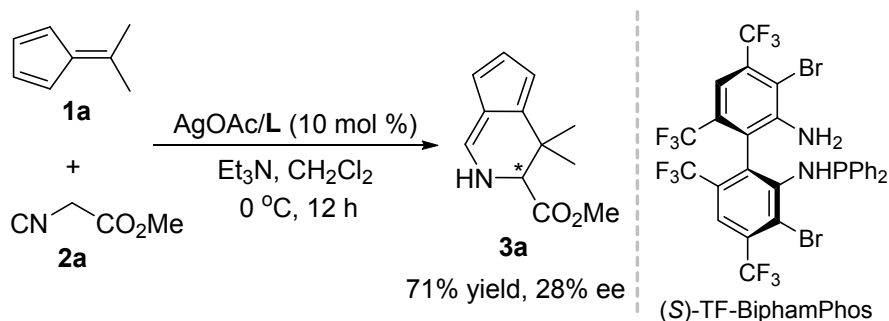

Under argon atmosphere, AgOAc (3.3 mg, 0.02 mmol) and TF-Biphamphos (14.1 mg, 0.022 mmol) and were dissolved in 2 mL DCM, and stirred at room temperature for about 30min. Isocyanoacetate **2a** (0.2 mmol), Et<sub>3</sub>N (0.03 mmol) were added sequentially. Then, the mixture was dropped to 0 °C and fulvene **1a** (0.3 mmol) was added. Once starting material was consumed (monitored by TLC), then the organic solvent was removed and the residue was purified by column chromatography to afford the product **3a** in 71% yield. The product was analyzed by HPLC to determine the enantiomeric excess: 28% ee (Chiralpak AS-H, *i*-propanol/hexane = 10/90, flow rate 1.0 mL/min, λ = 220 nm); t<sub>r</sub> = 8.59 and 10.61 min.

### V. References

- 1 (a) Stone, K. J.; Little, R. D. *J. Org. Chem.* **1984**, 49, 1849. (b) Erden, I.; Xu, F.-P.; Sadoun, A.; Smith, W.; Sheff, G.; Ossun, M. *J. Org. Chem.* **1995**, 60, 813. (c) Bandar, J. S.; Coscia, R. W.; Lambert, T. H. *Tetrahedron* **2011**, 67, 4364.
2. (a) Galan, B. R.; Kalbarczyk, K. P.; Szczepankiewicz, S.; Keister, J. B.; Diver, S. T. *Org. Lett.* **2007**, 9, 1203. (b) Elders, N.; Schmitz, R. F.; de Kanter, F. J. J.; Ruijter, E.; Groen, M. B.; Orru, R. V. A. *J. Org. Chem.* **2007**, 72, 6135.
3. Wang, C.-J.; Liang, G.; Xue, Z.-Y.; Gao, F. *J. Am. Chem. Soc.* **2008**, 130, 17250.

#### IV. $^1\text{H}$ NMR and $^{13}\text{C}$ NMR Spectra

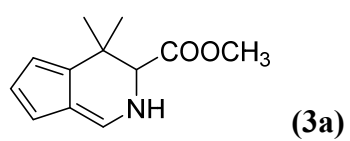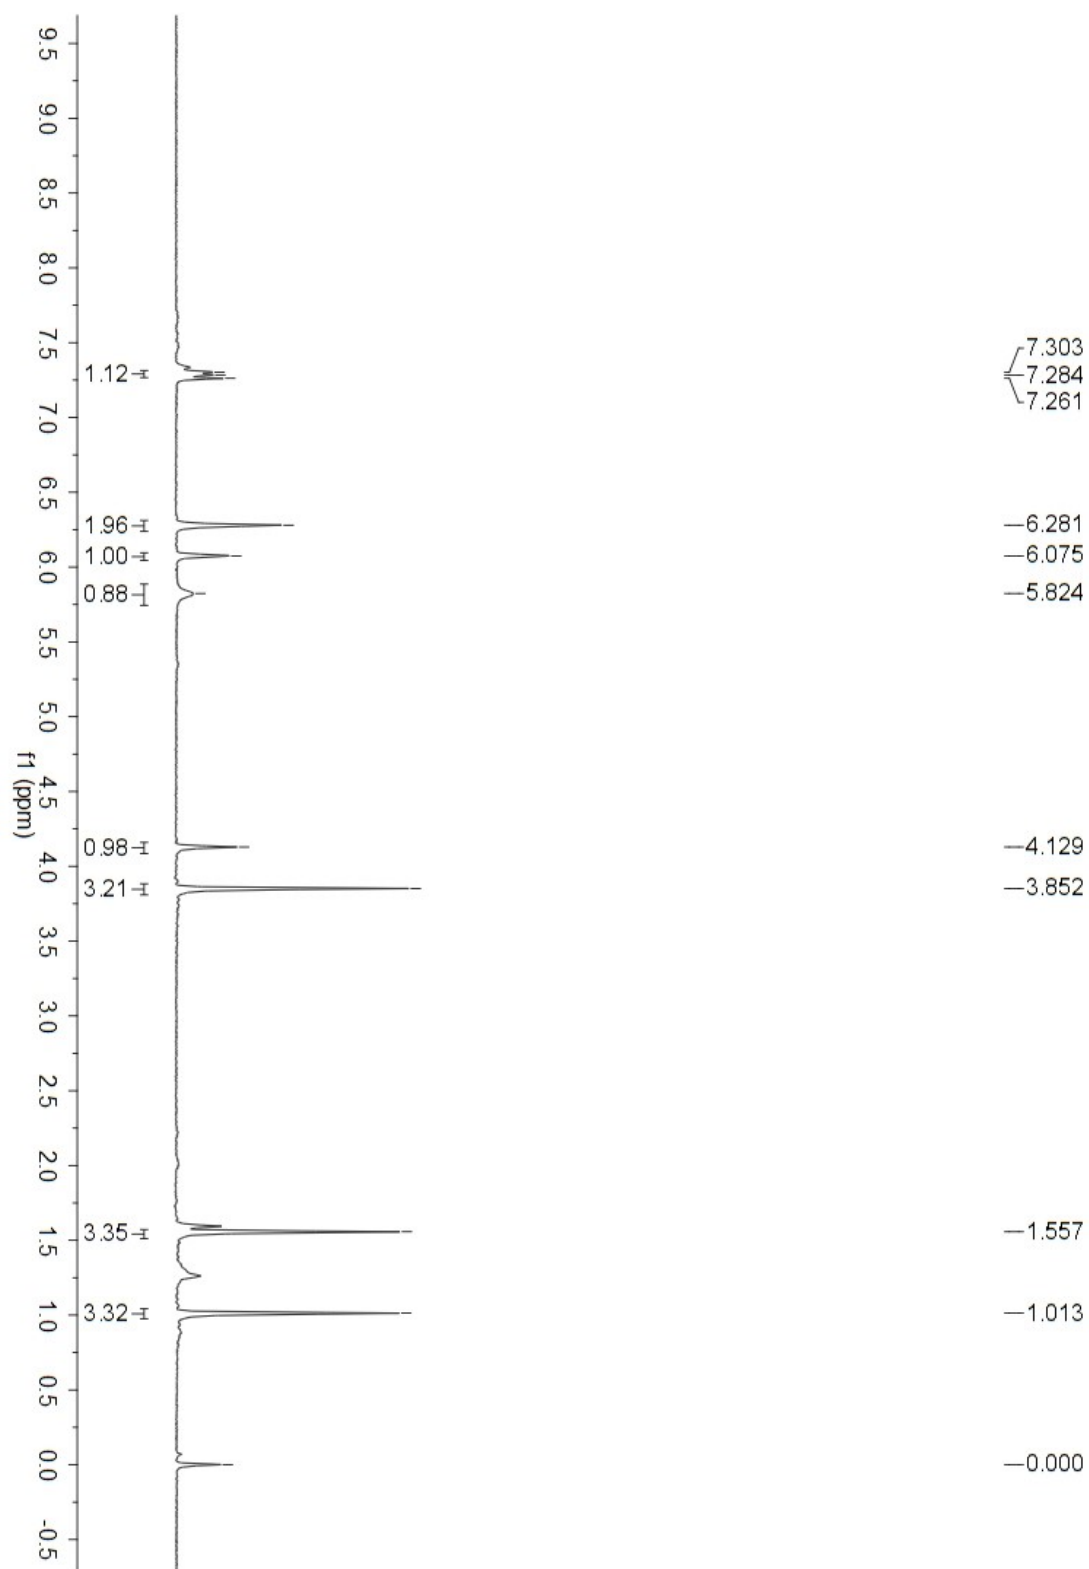

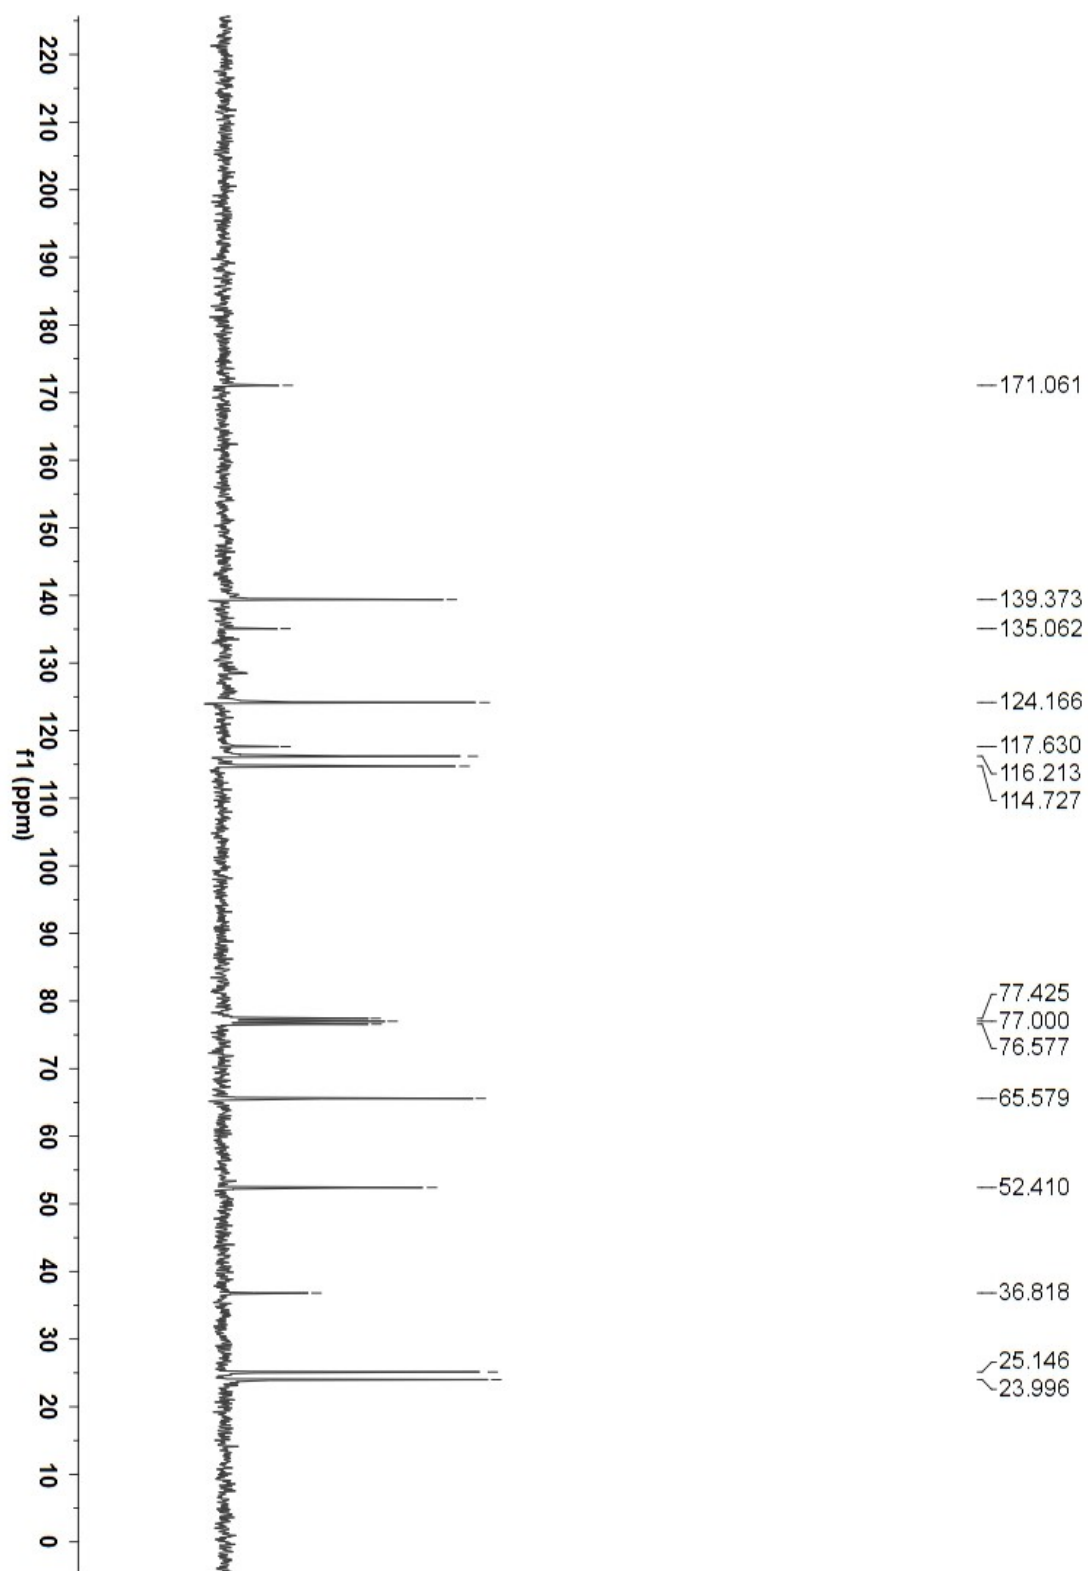

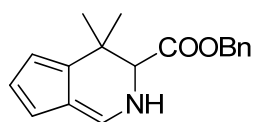

(3b)

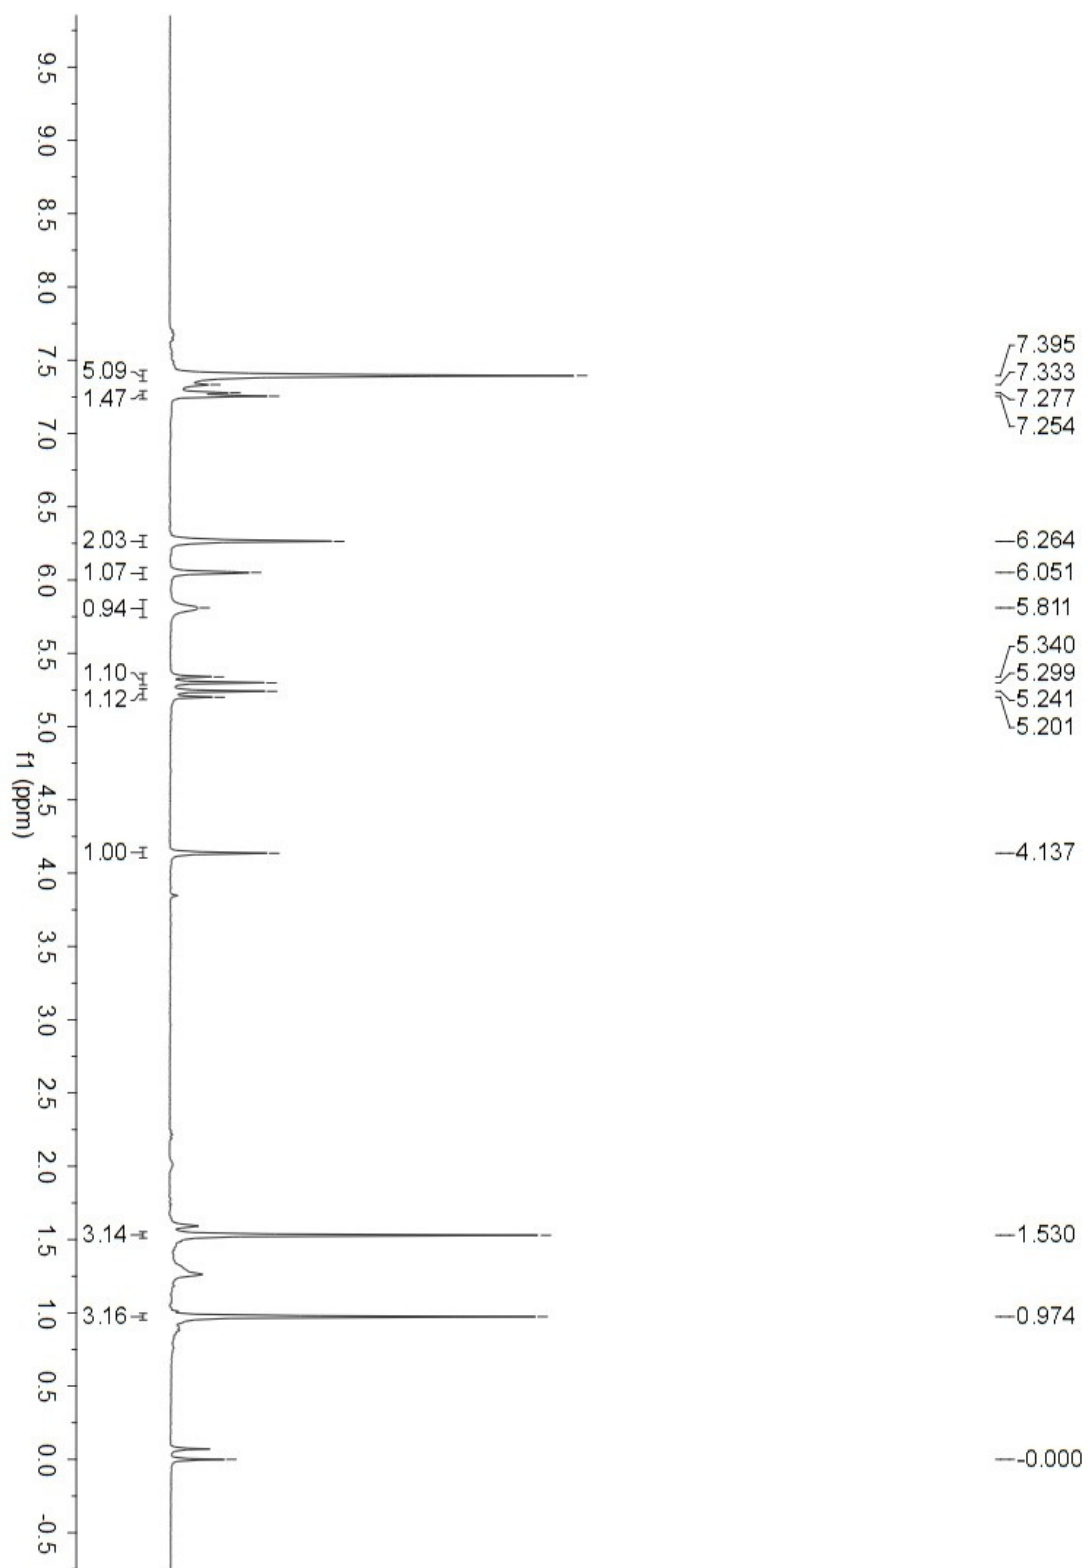

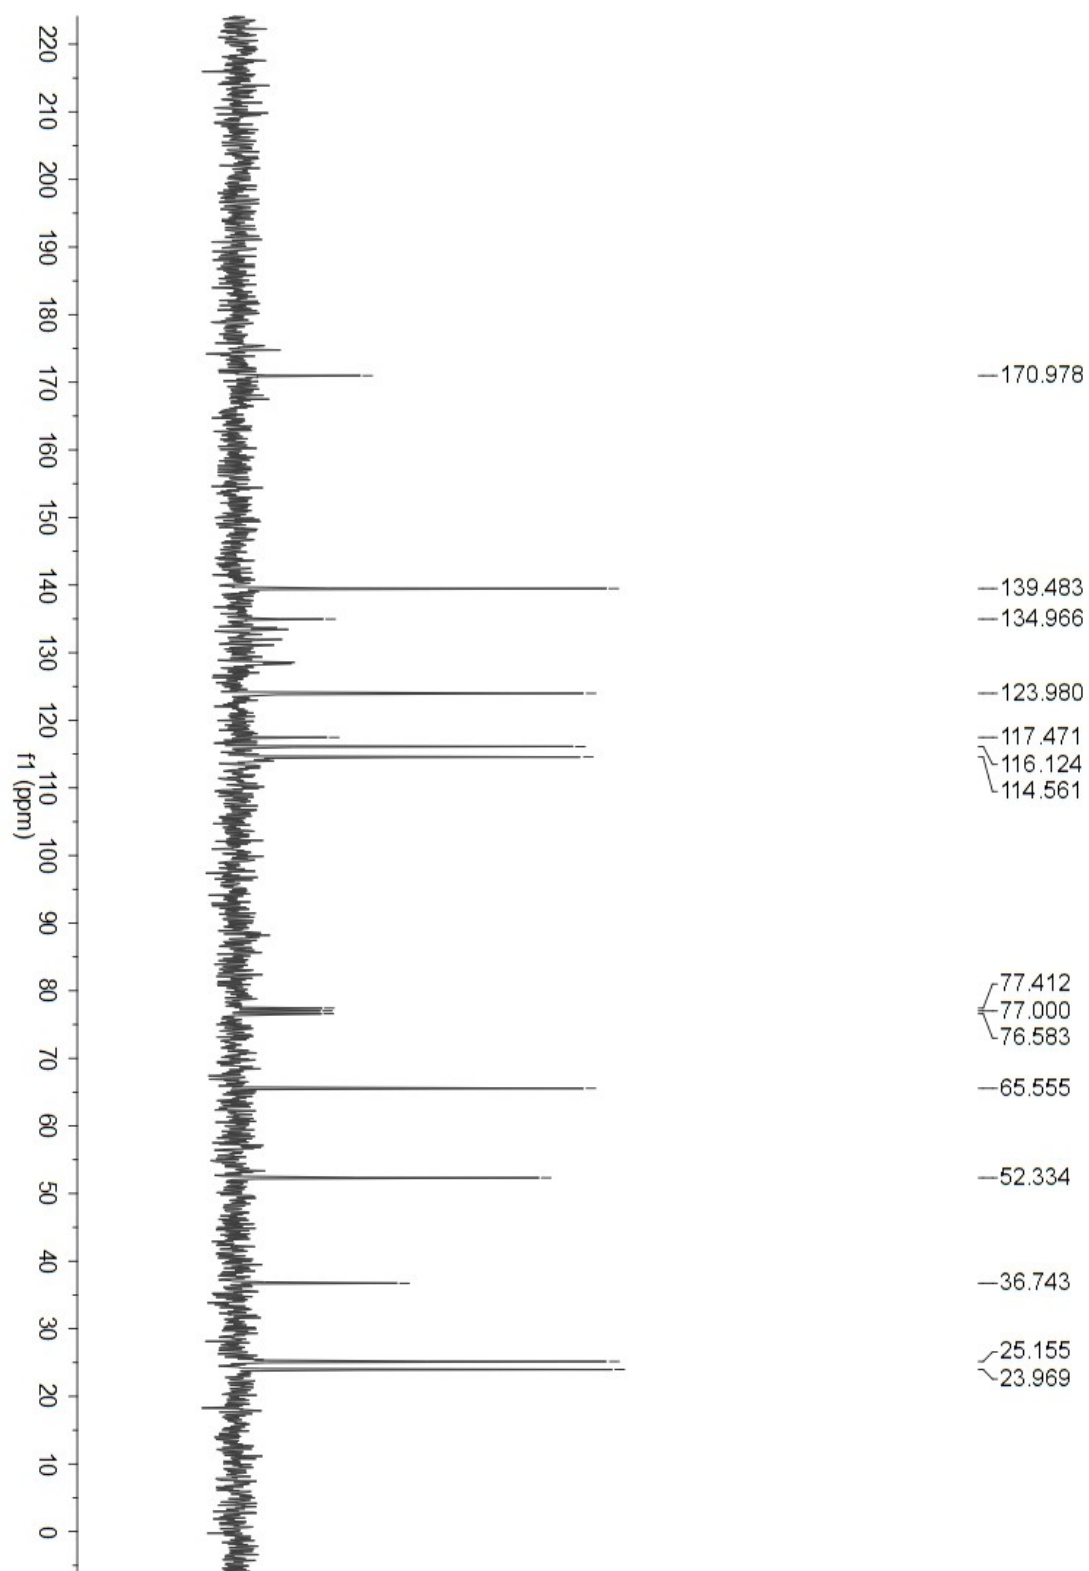

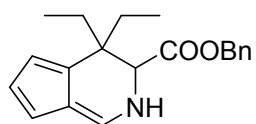

(3c)

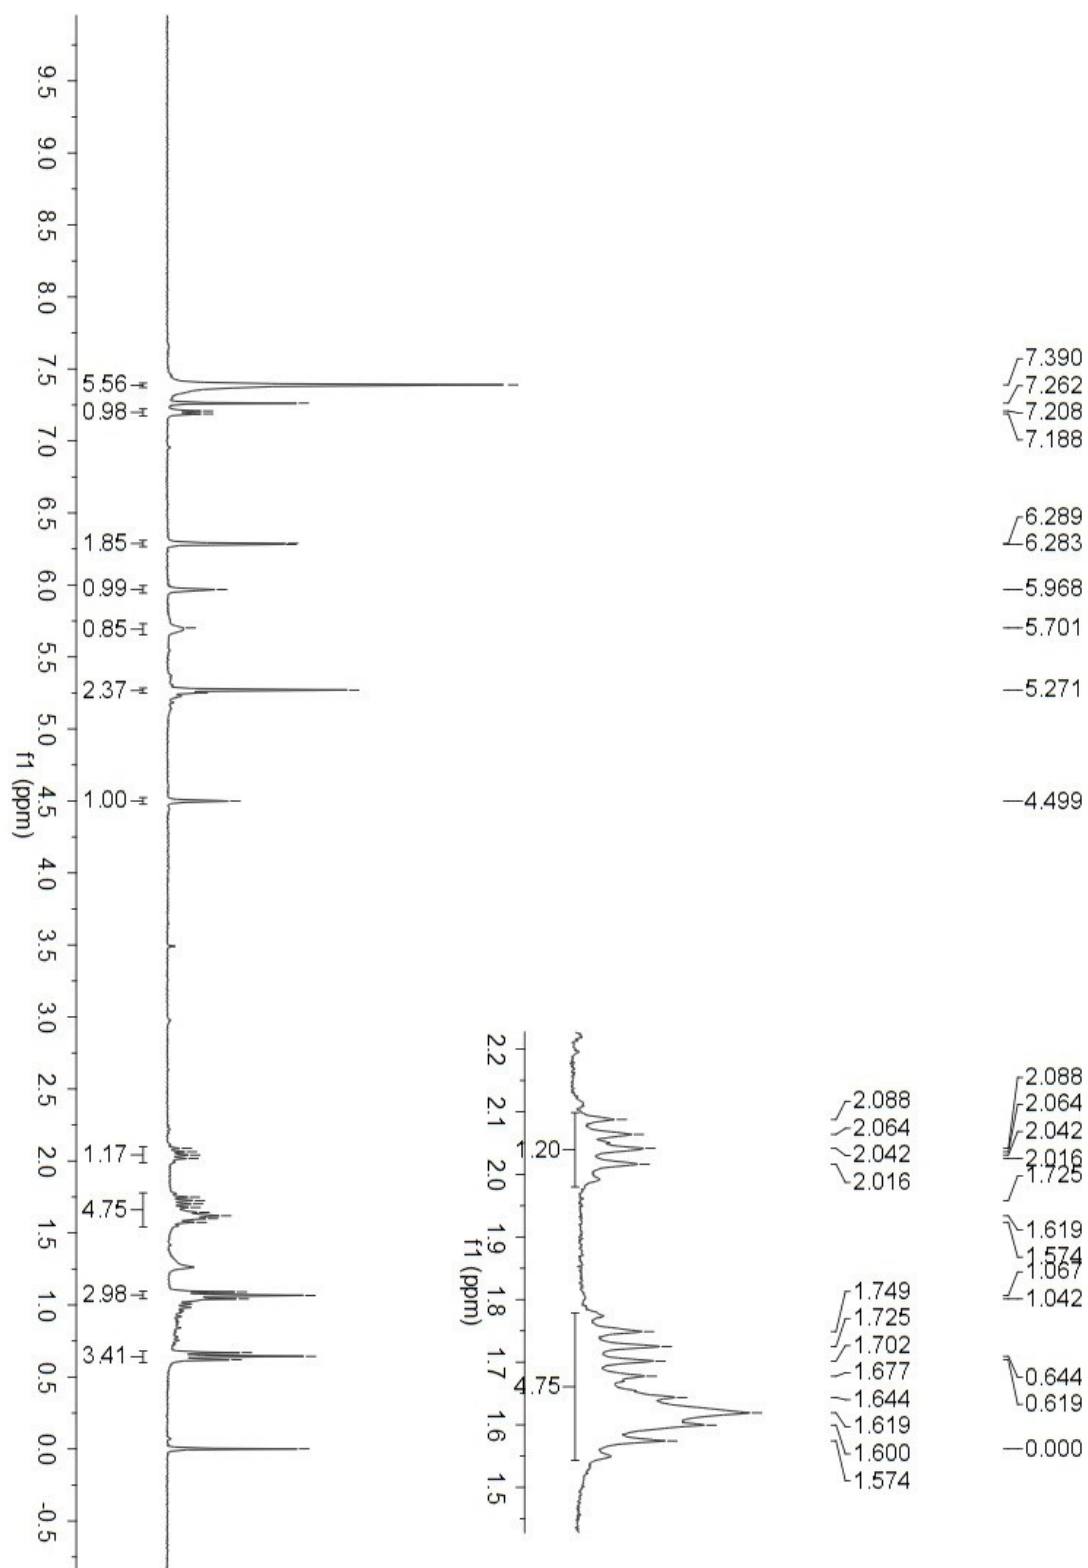



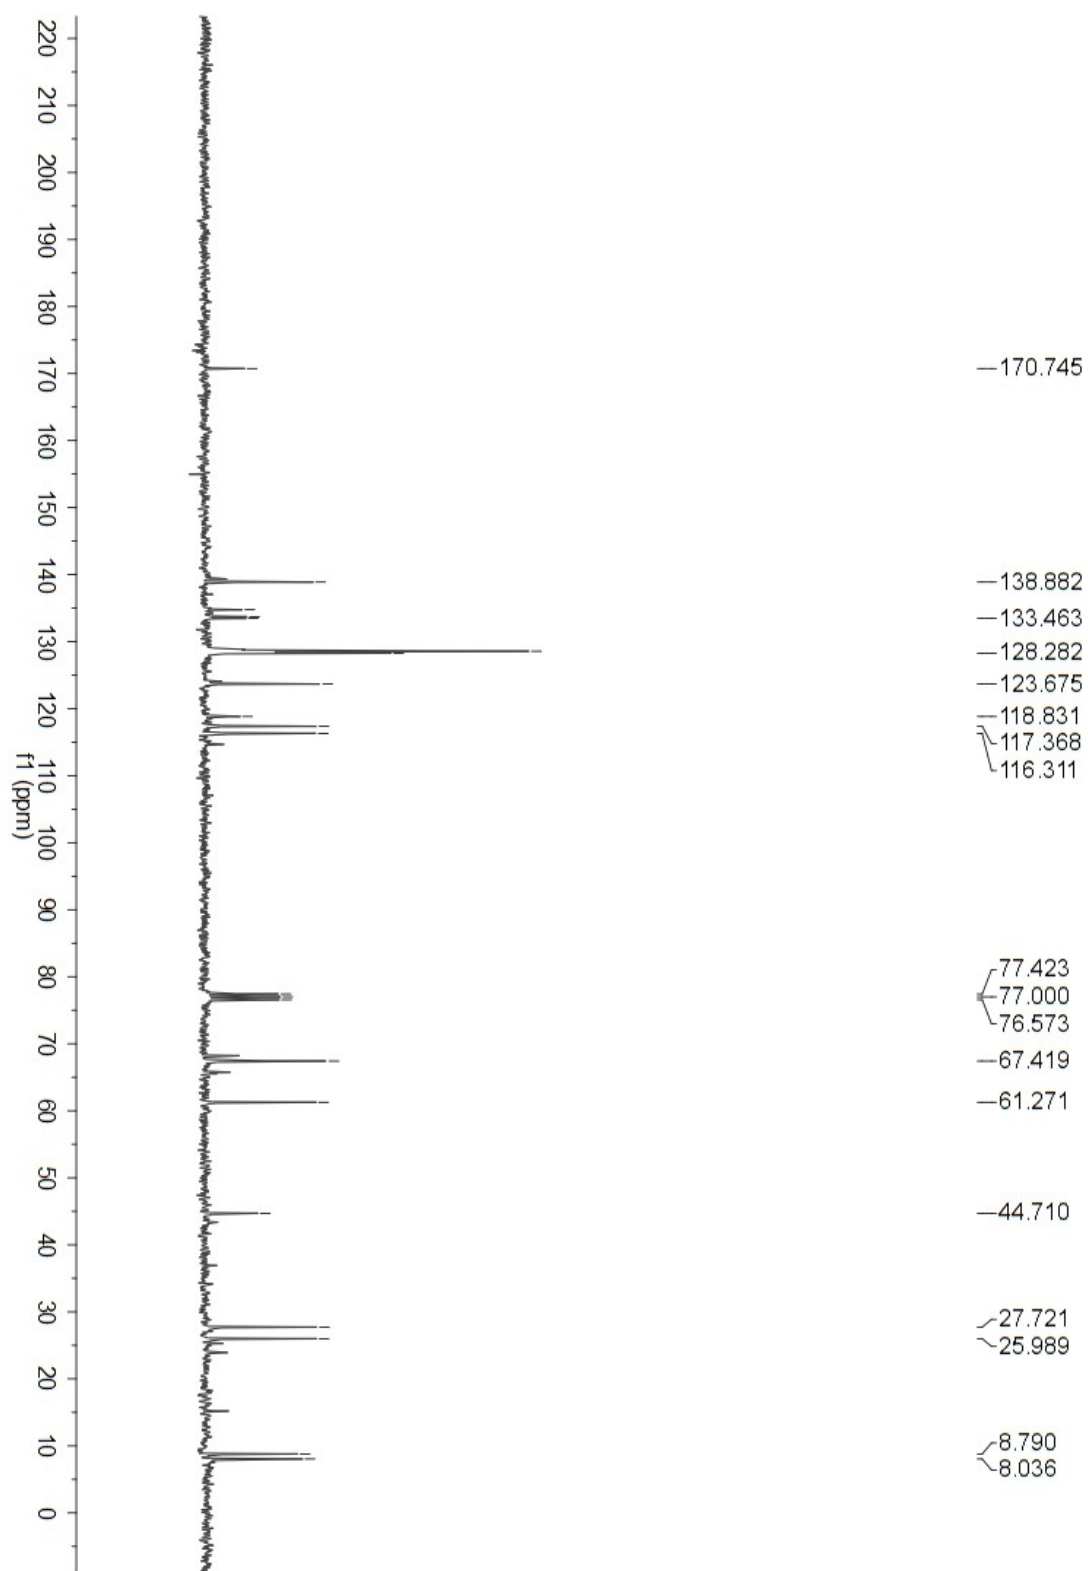

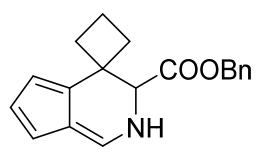

(3d)

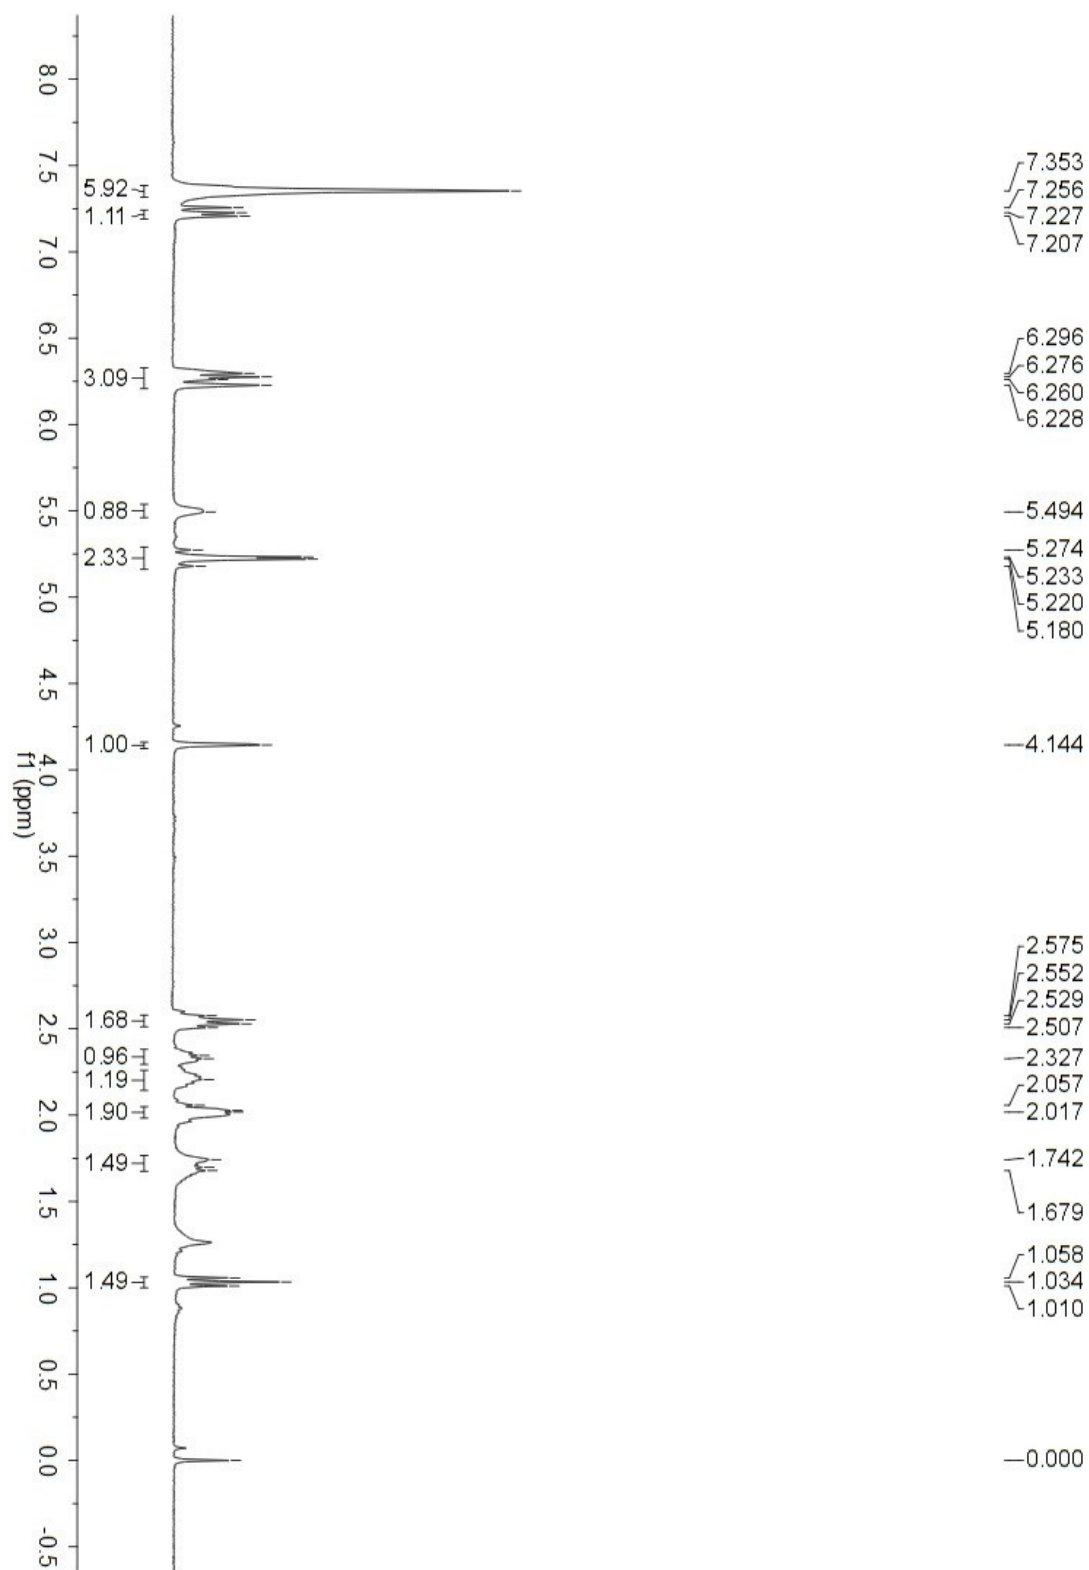

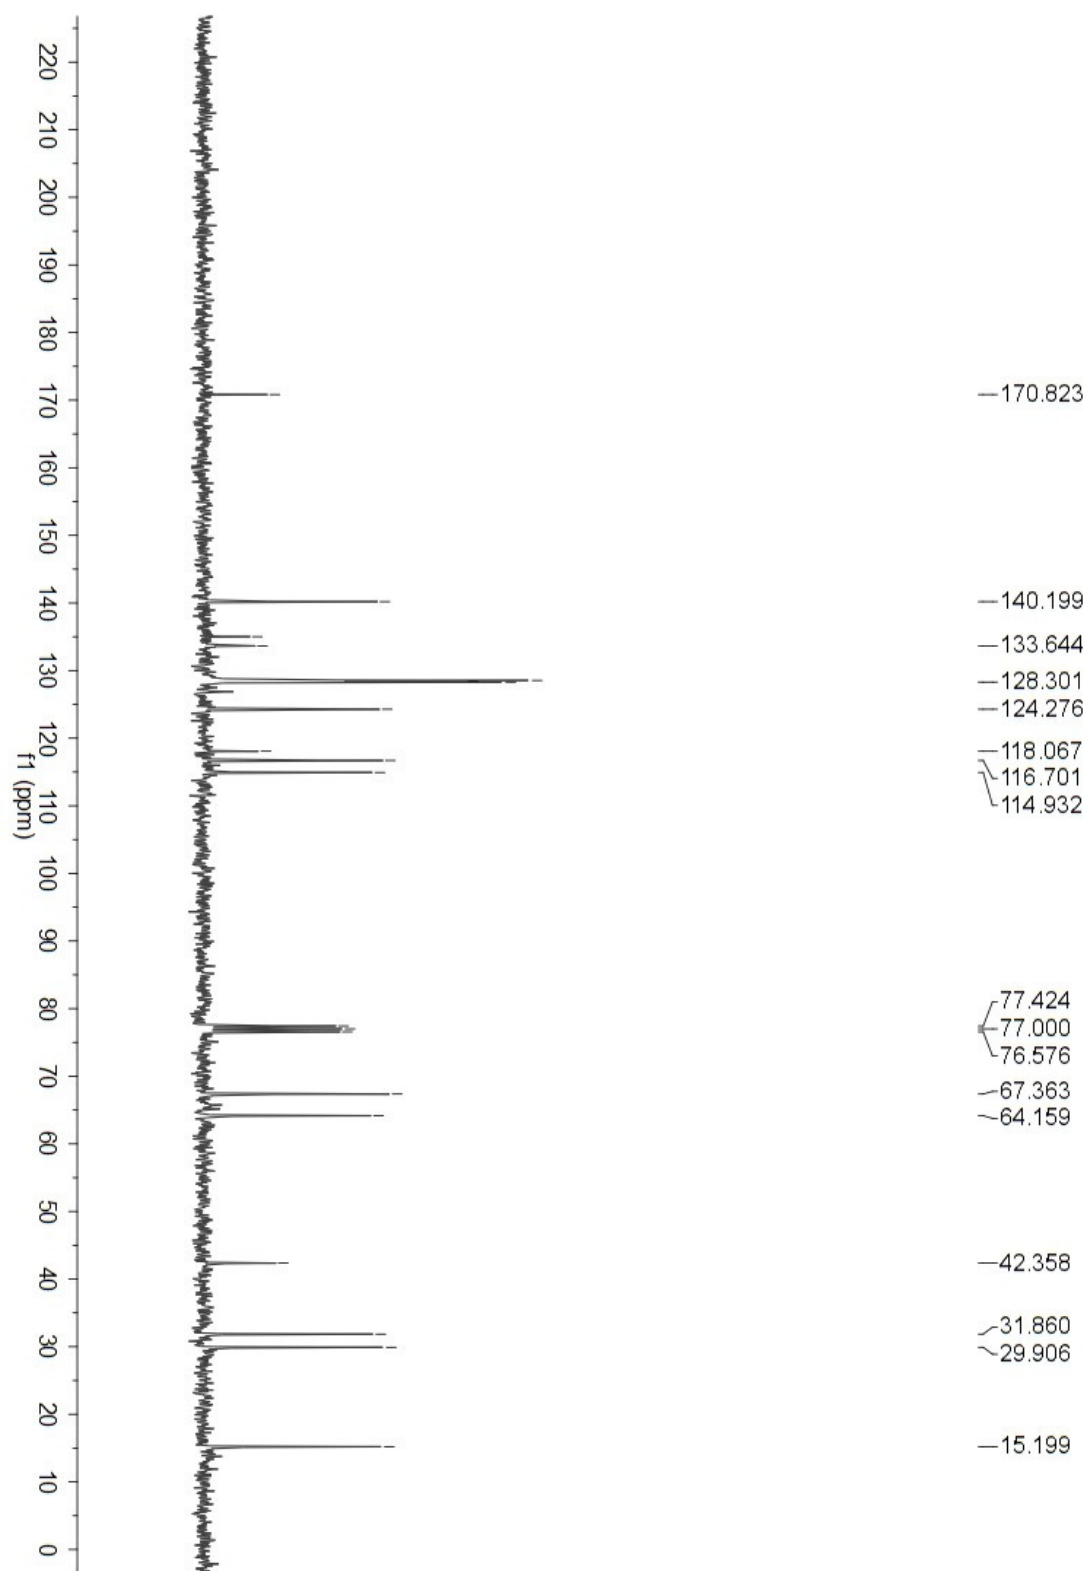

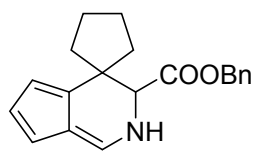

(3e)

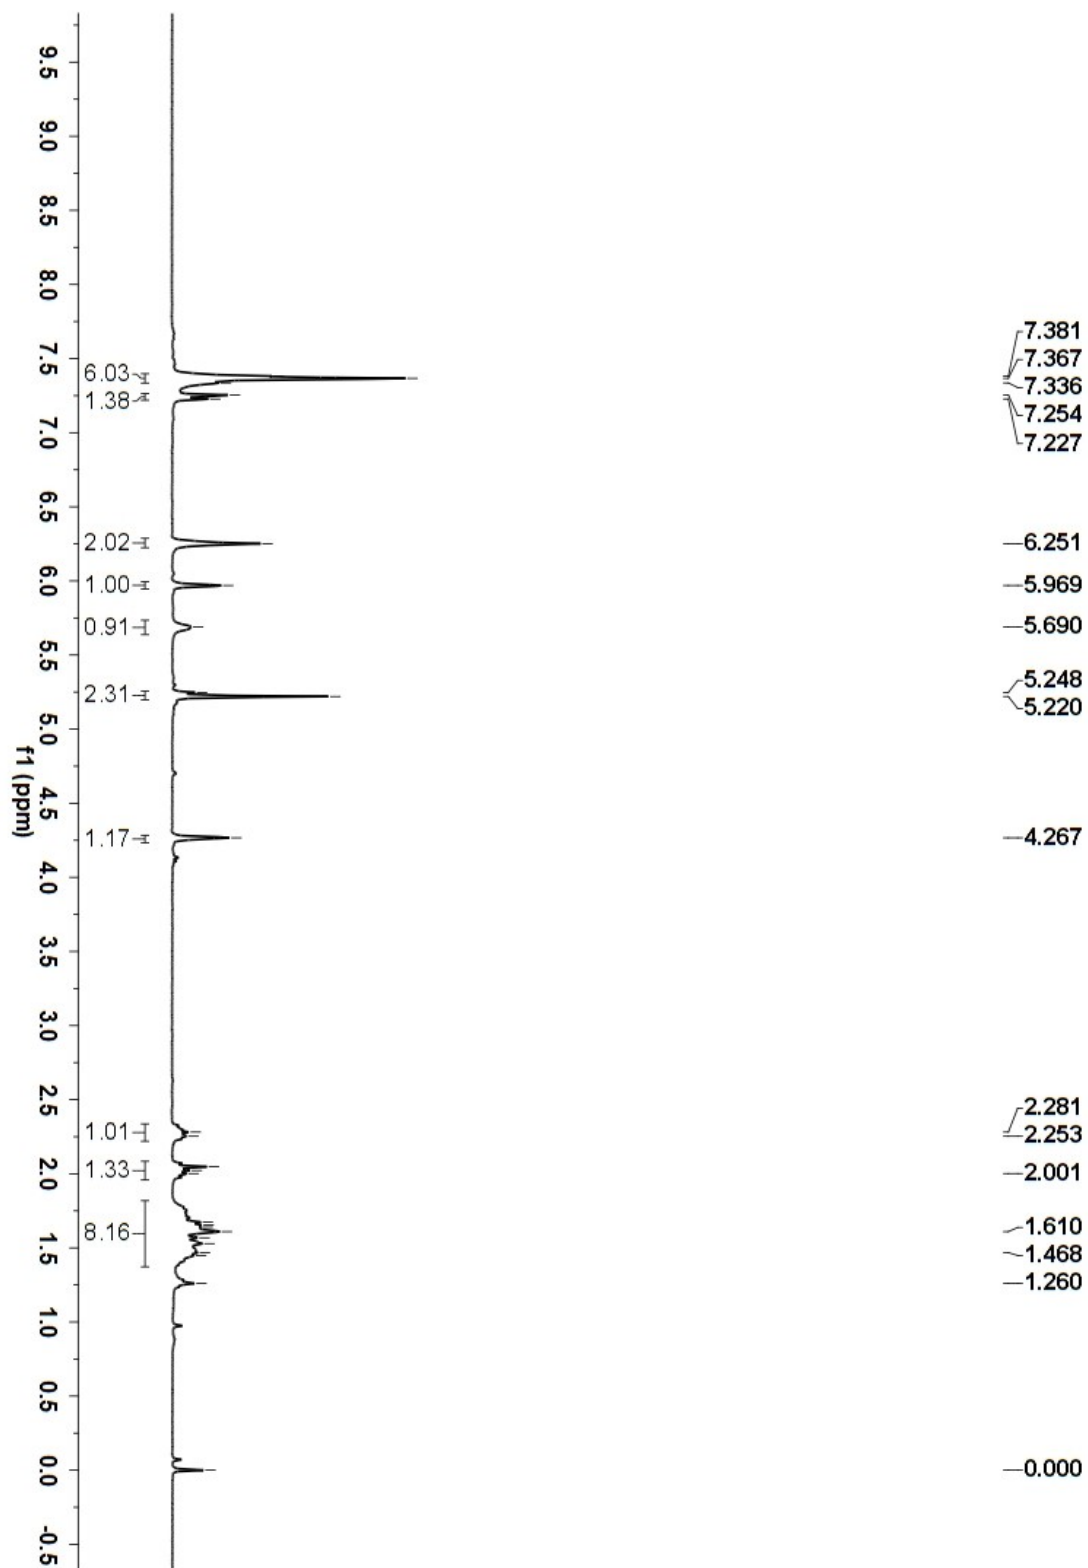

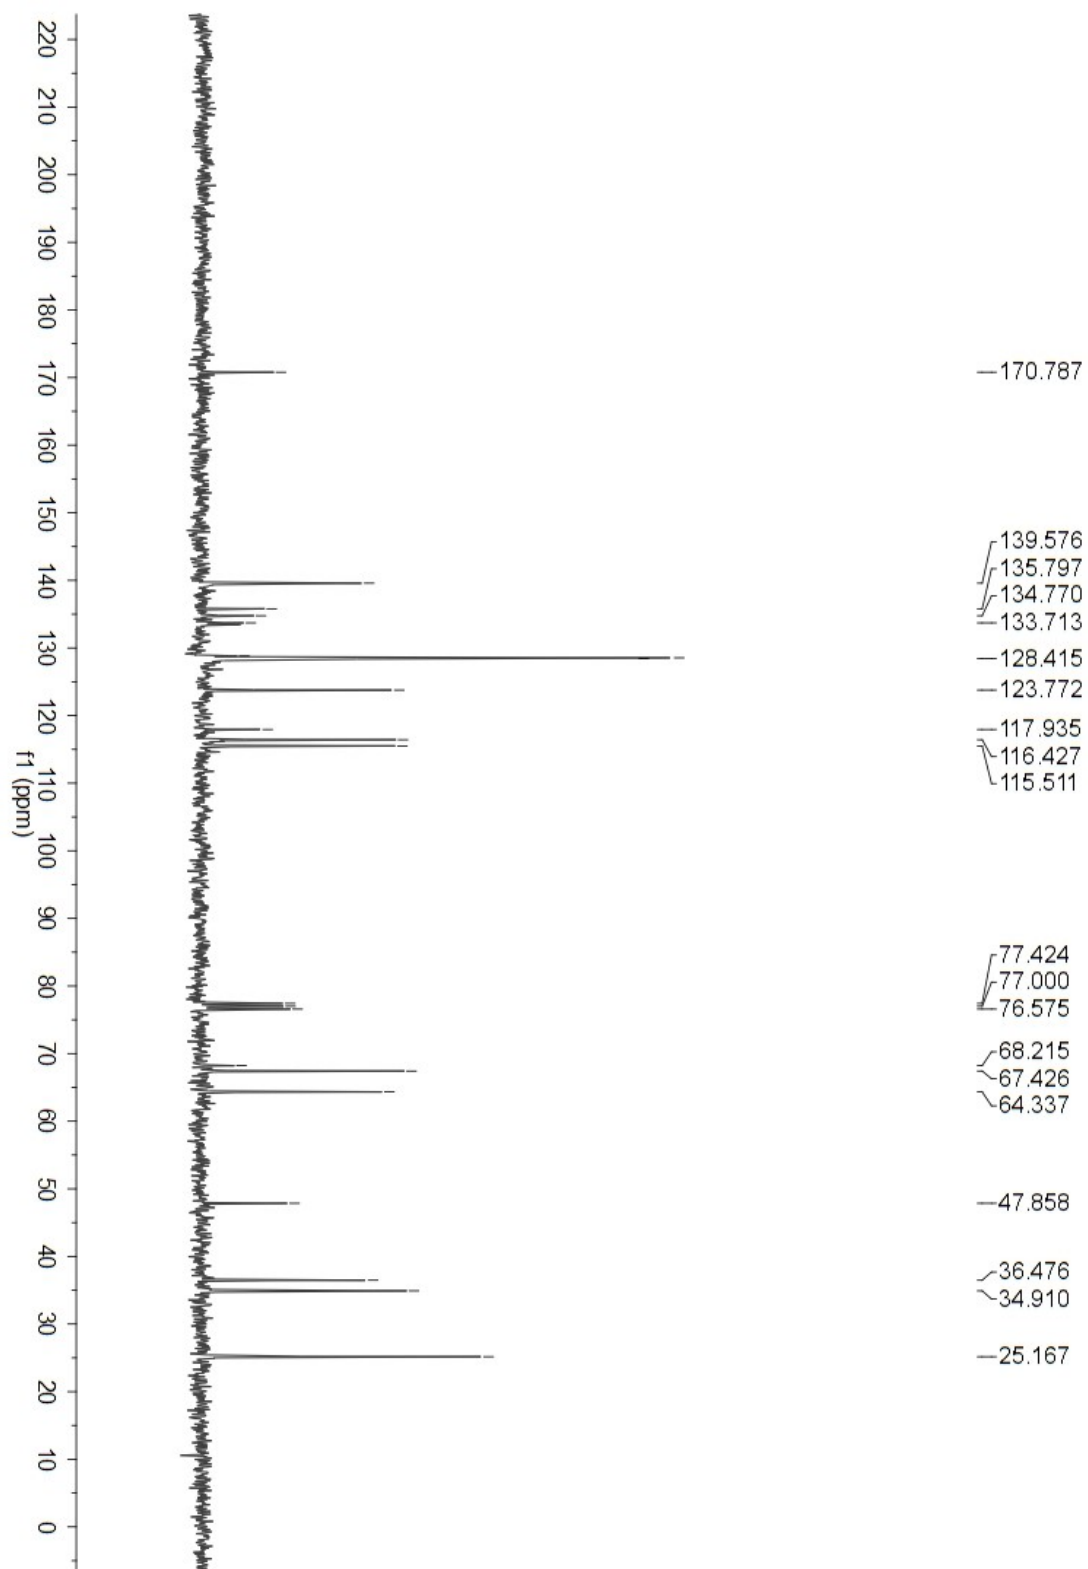

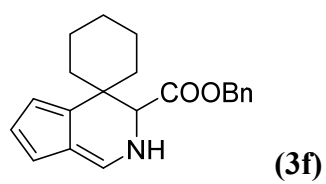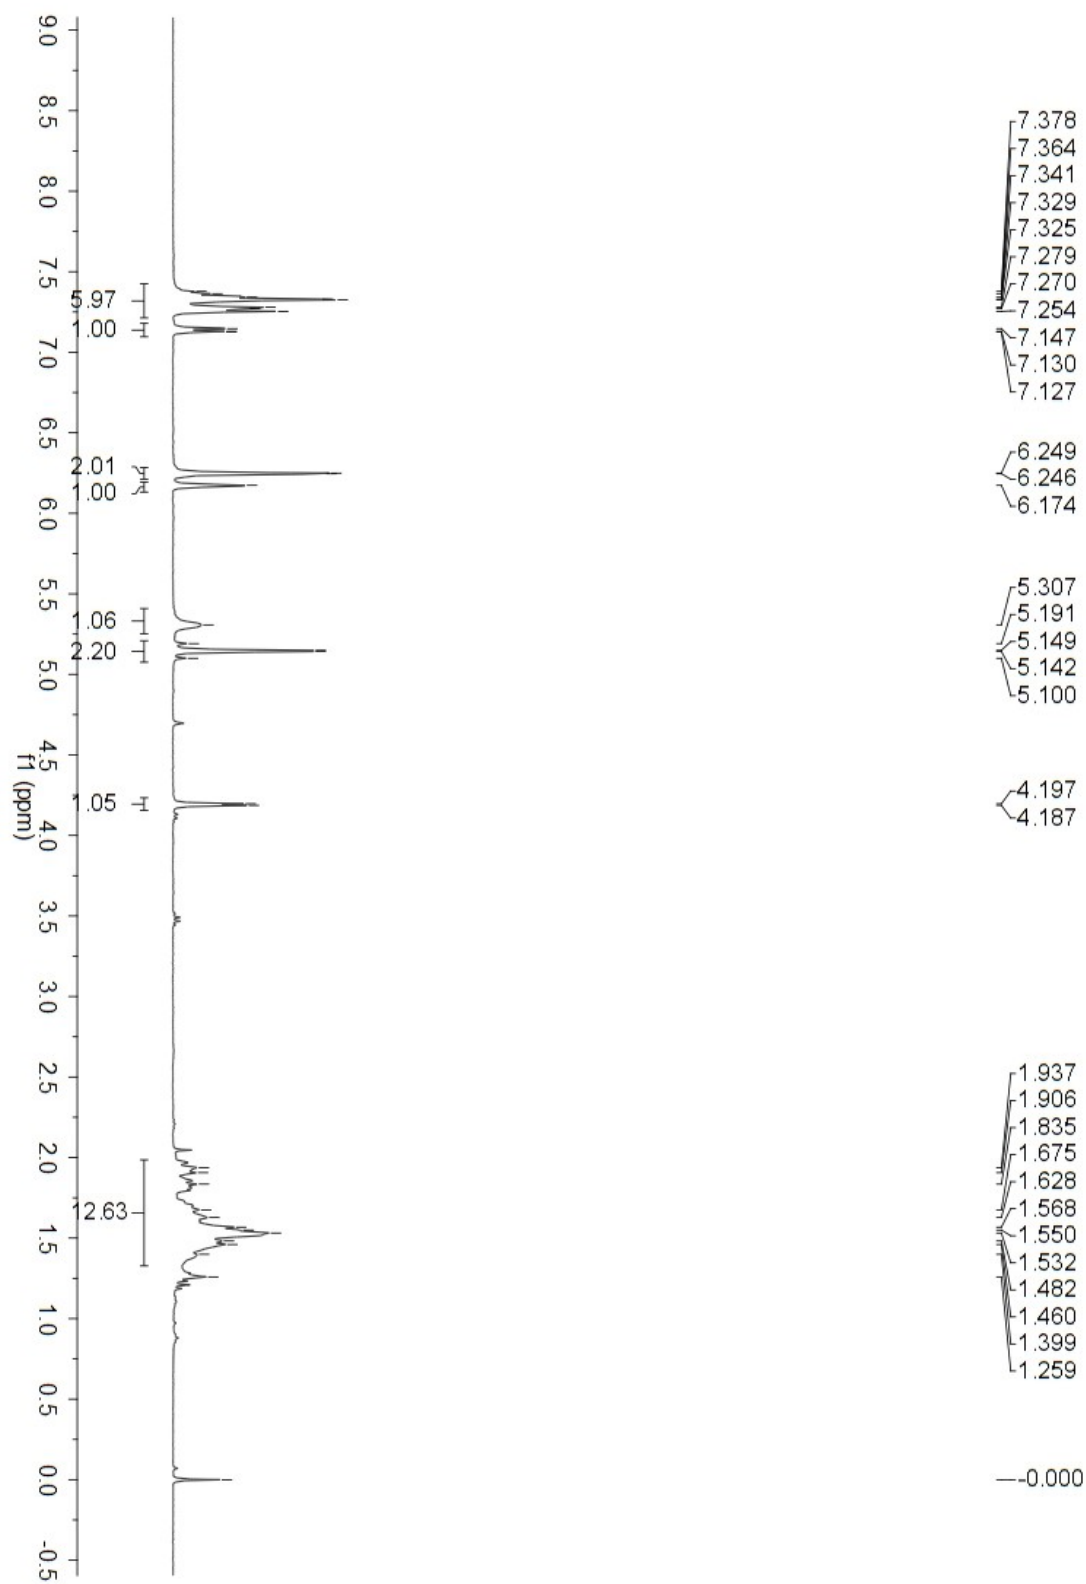

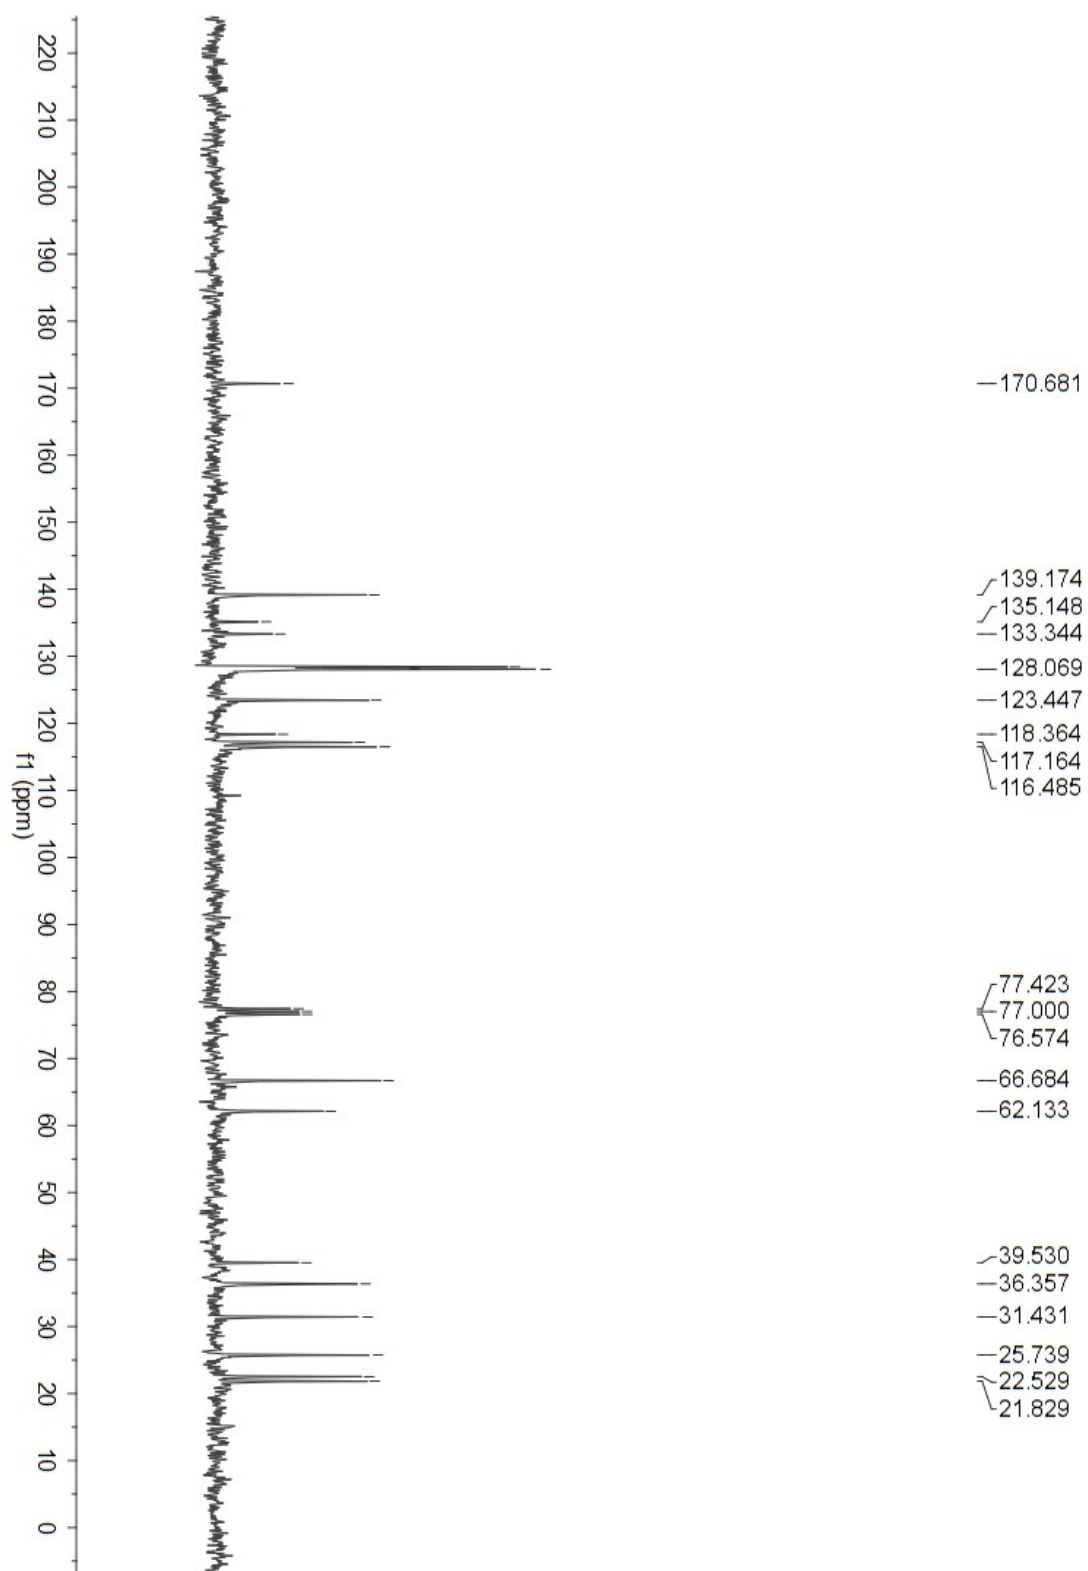

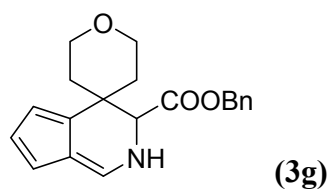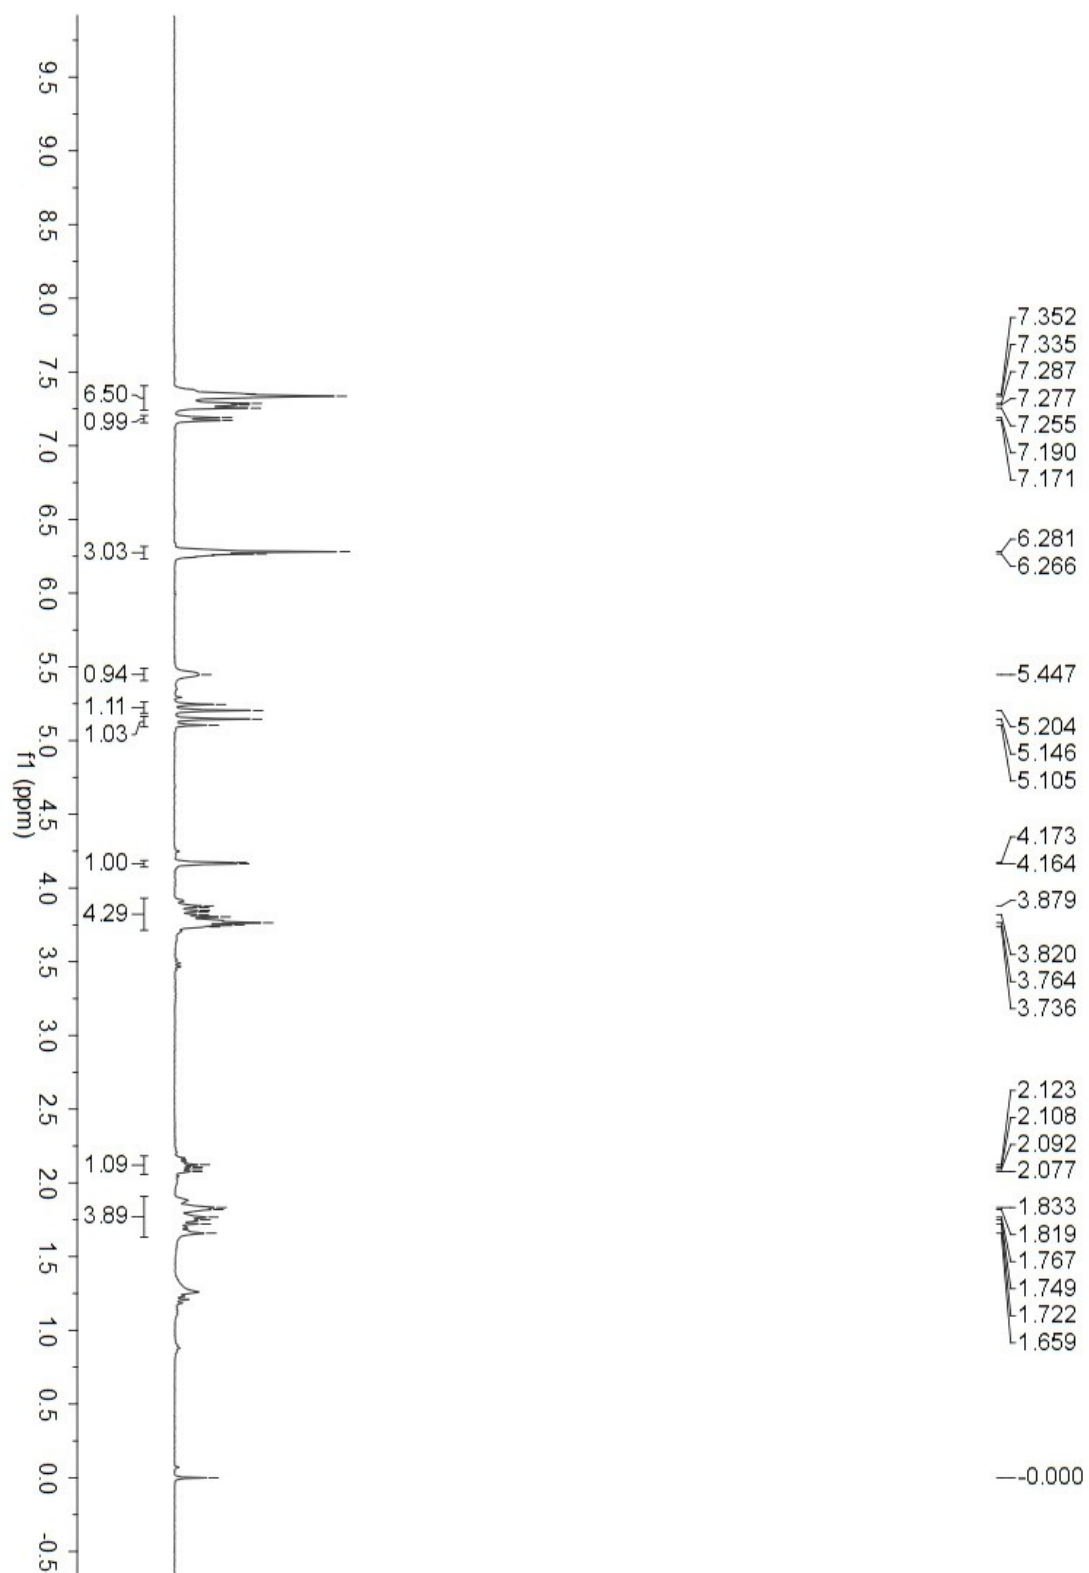



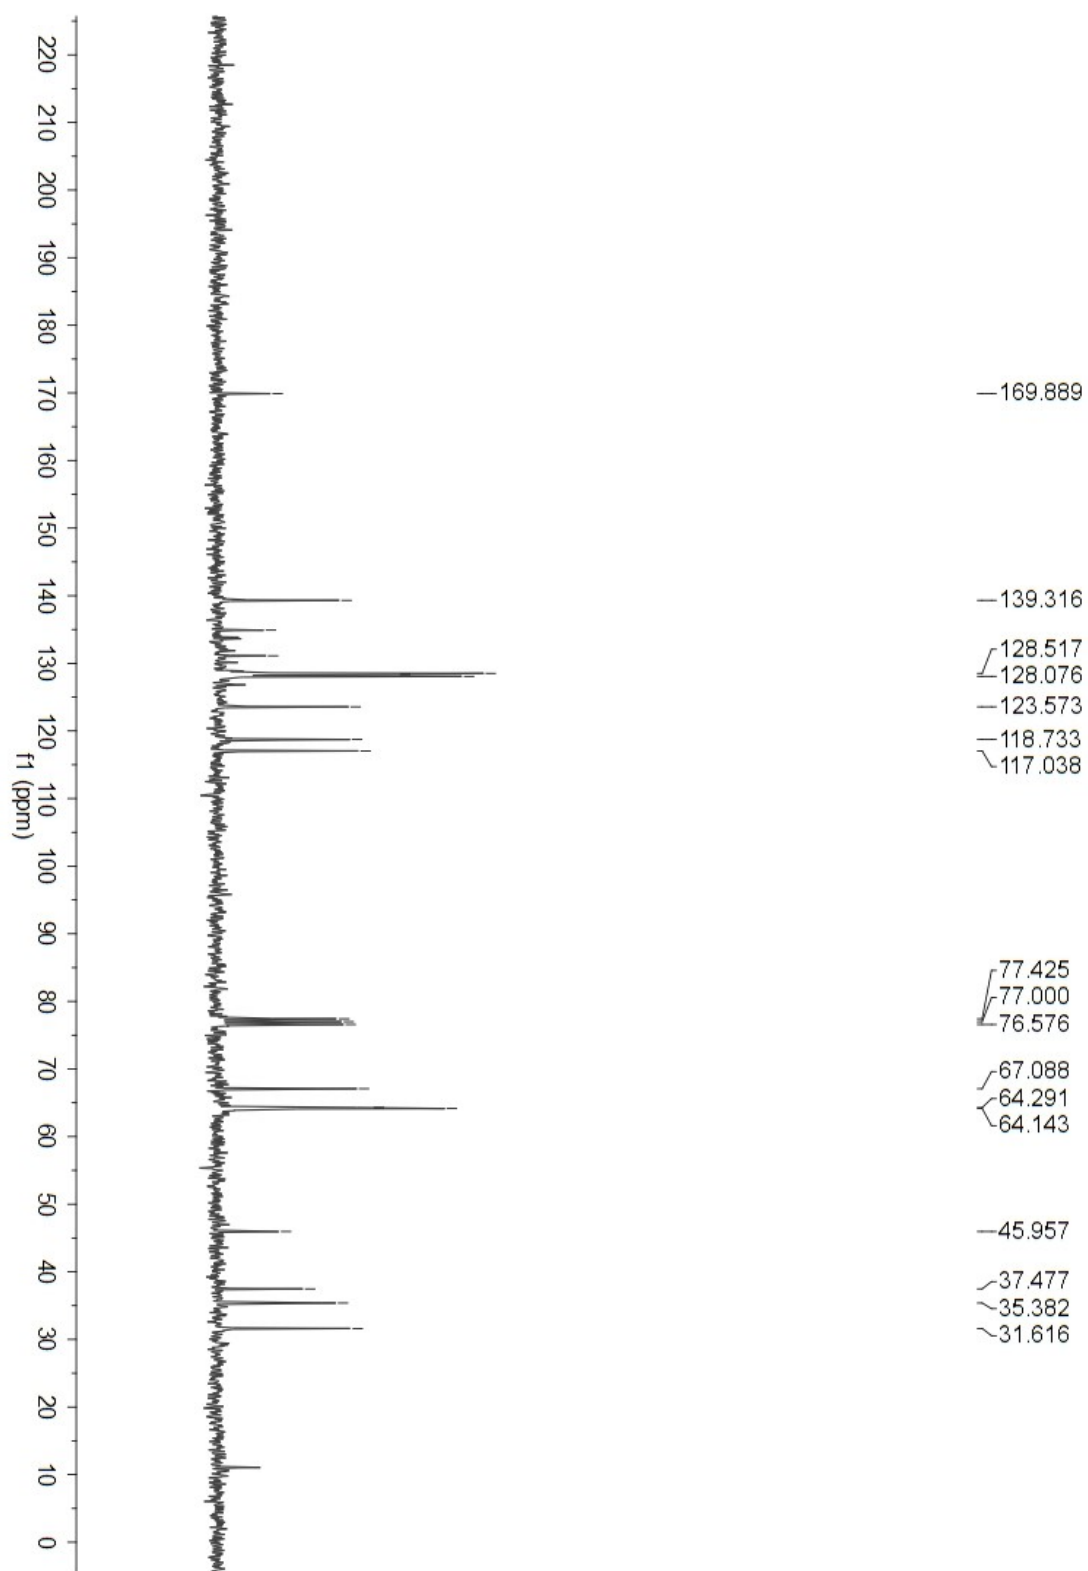

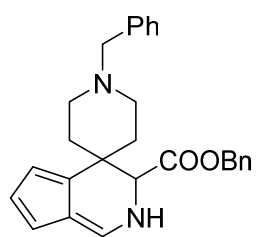

(3h)

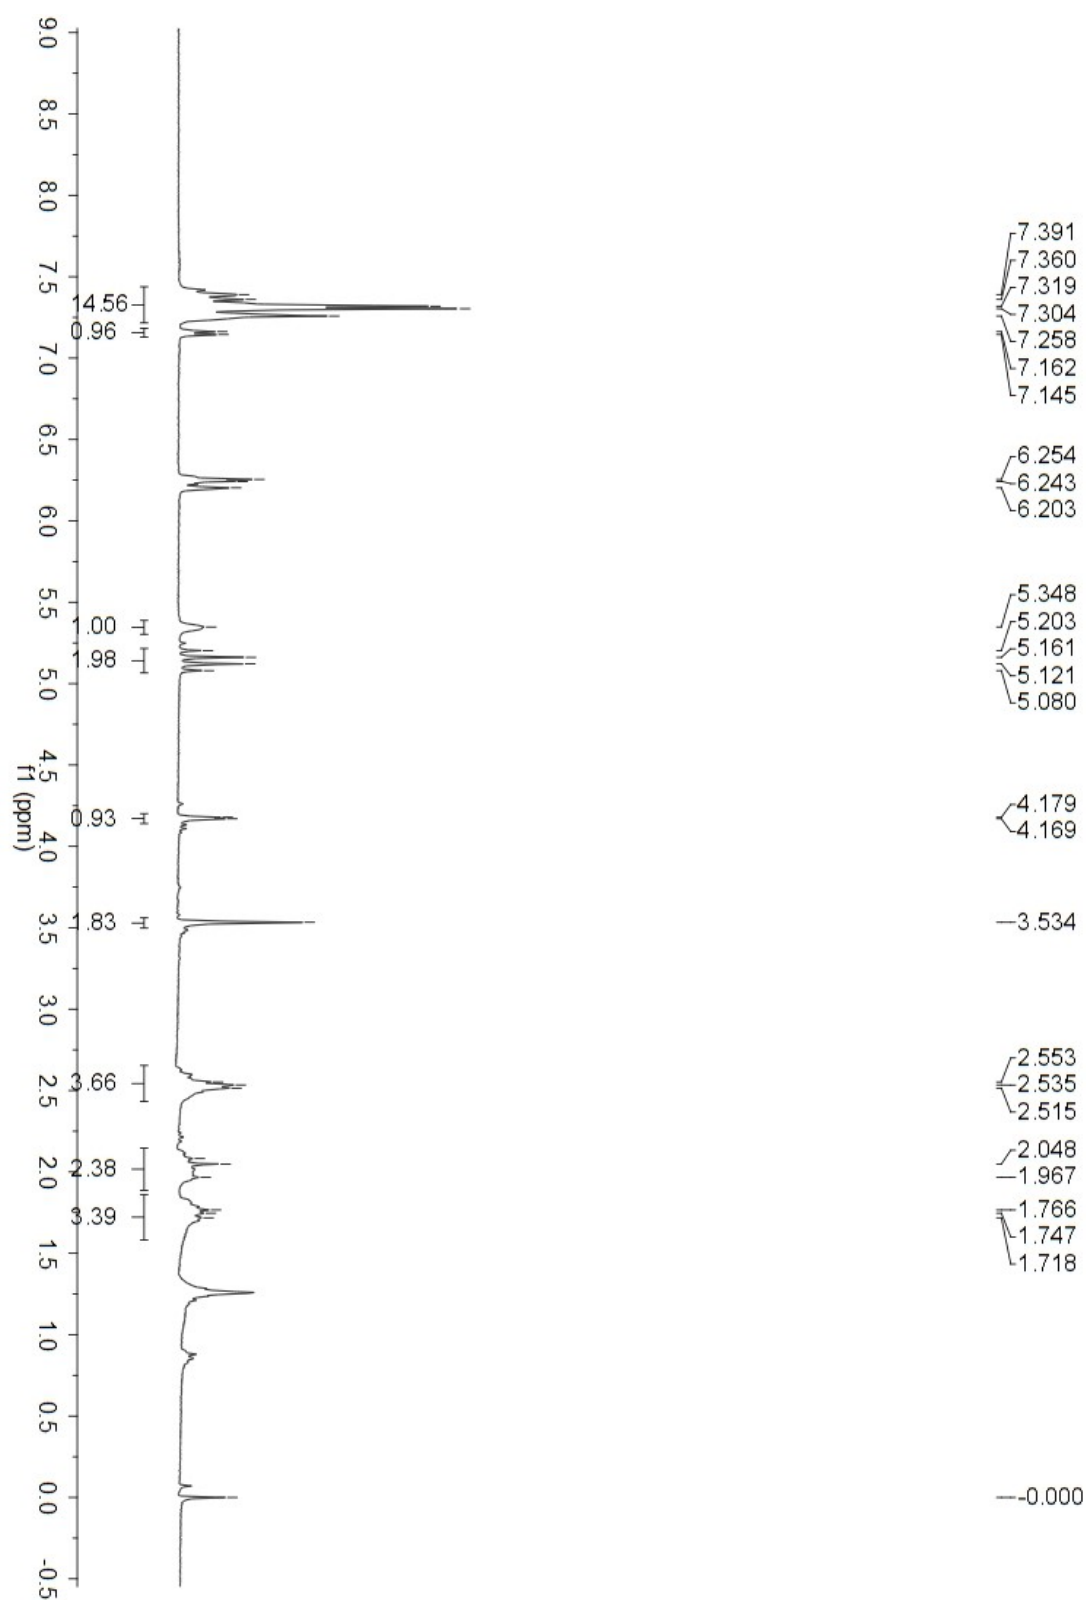

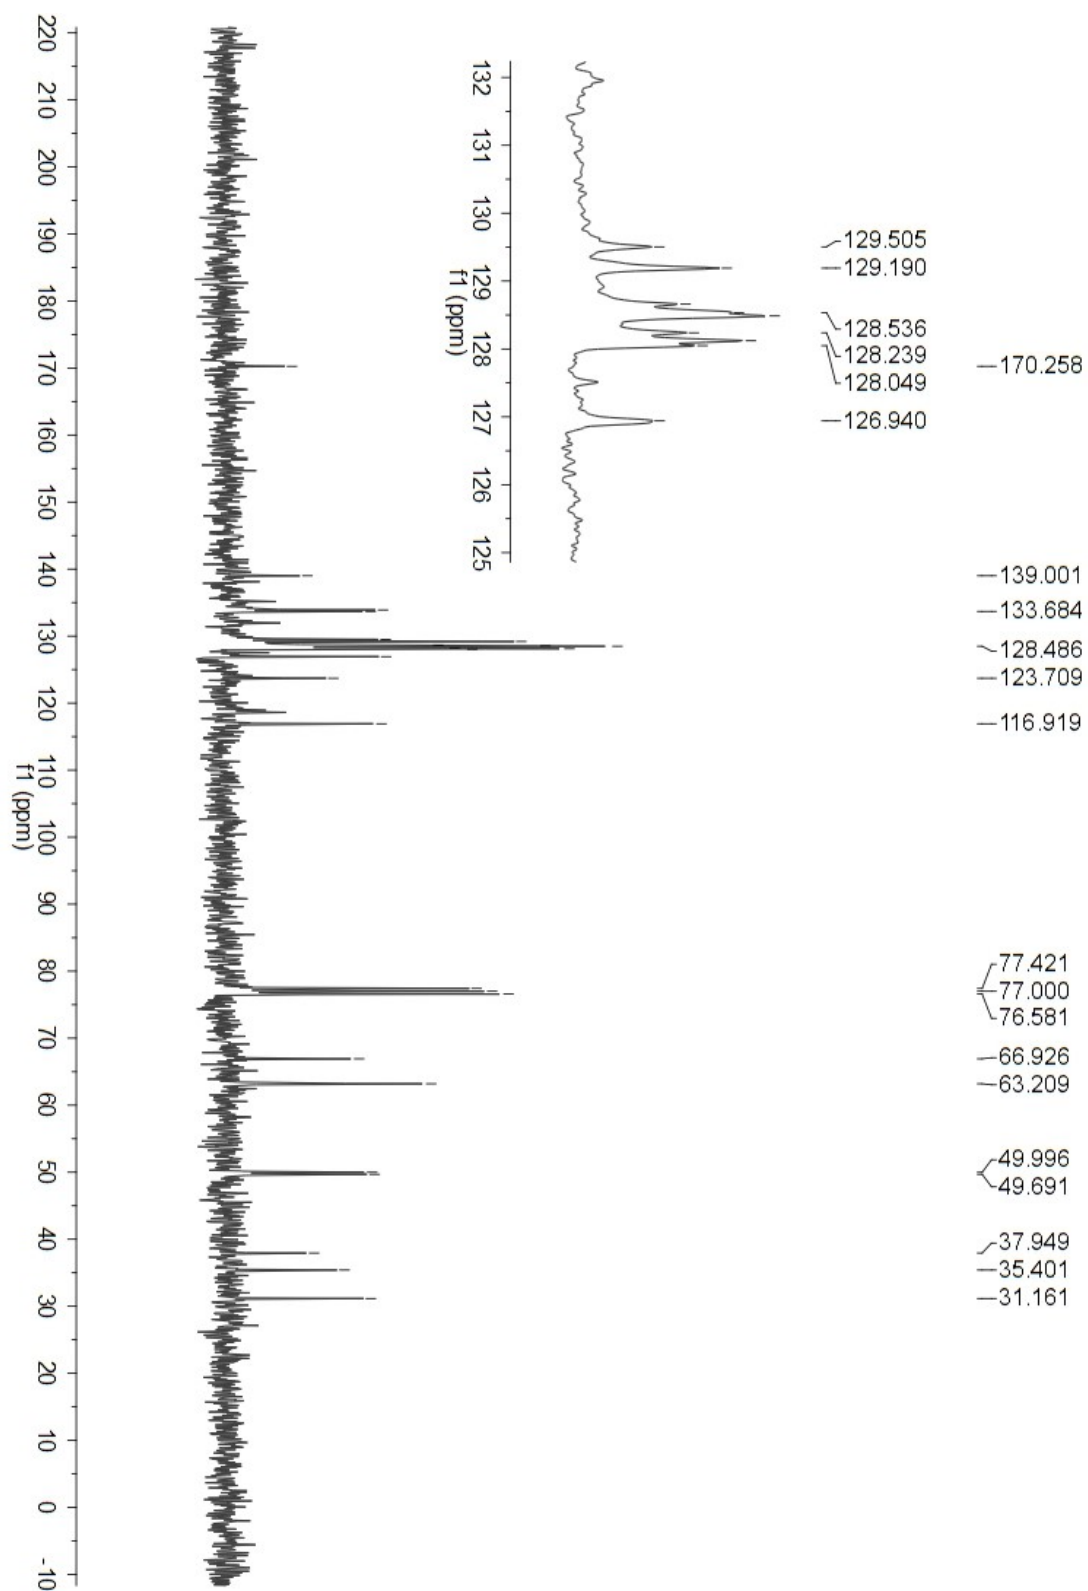

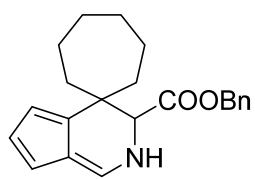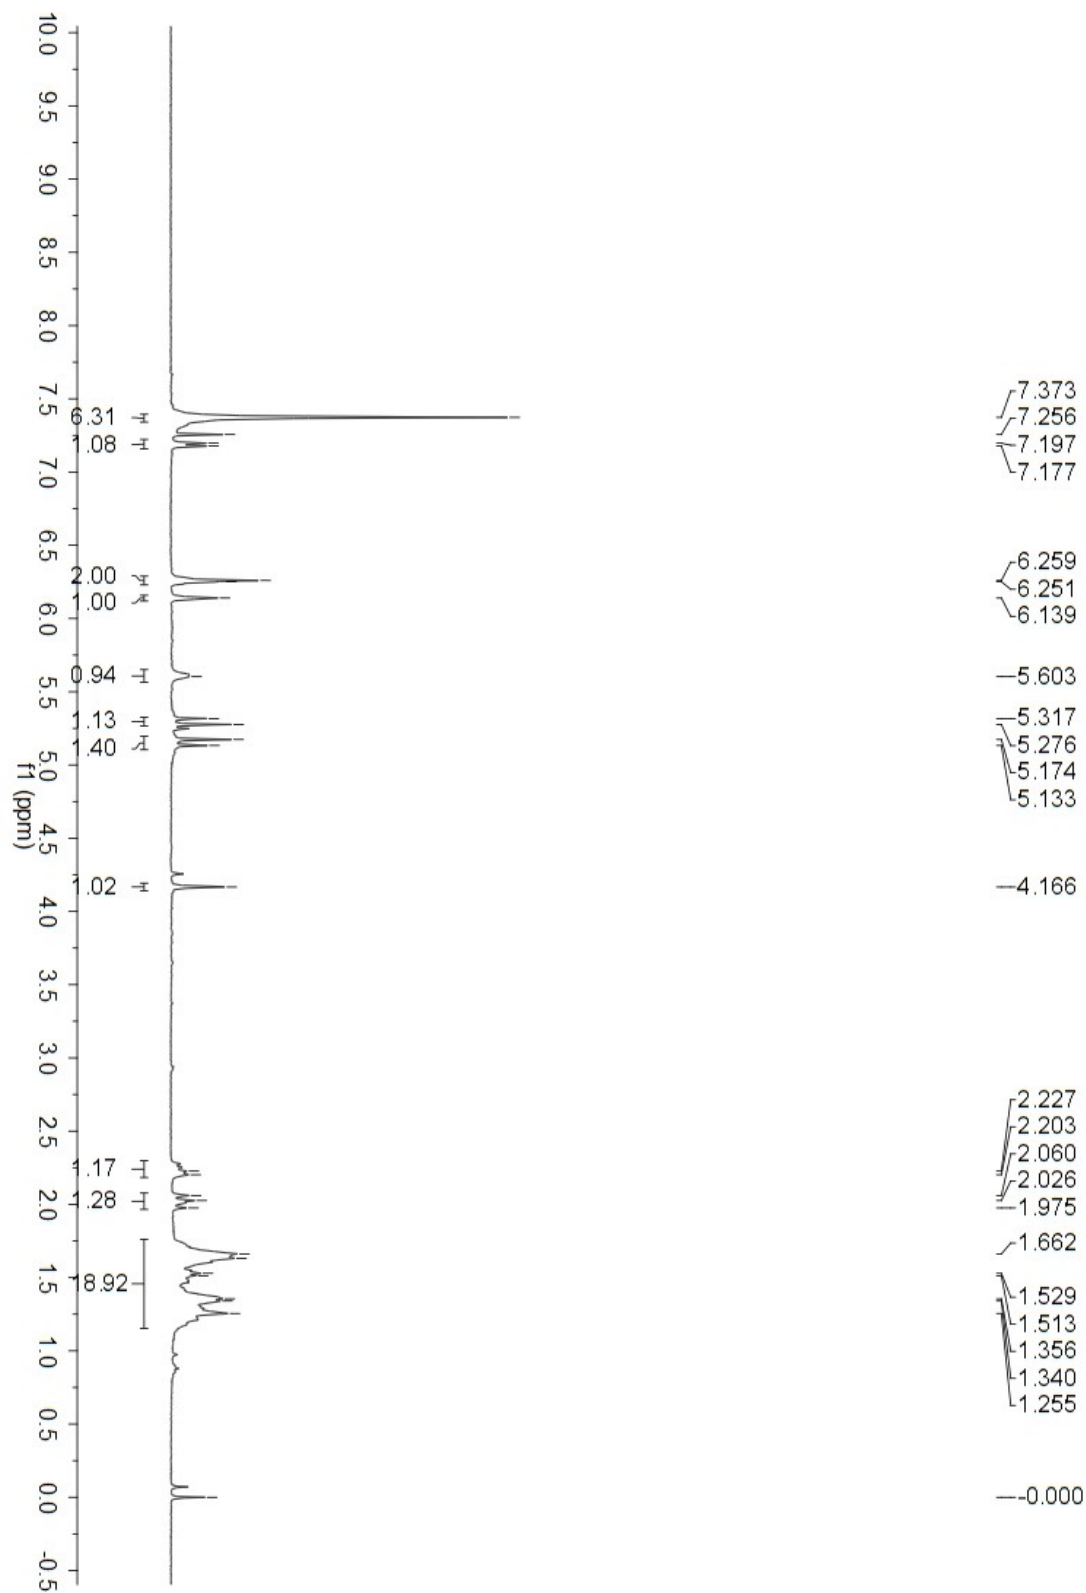

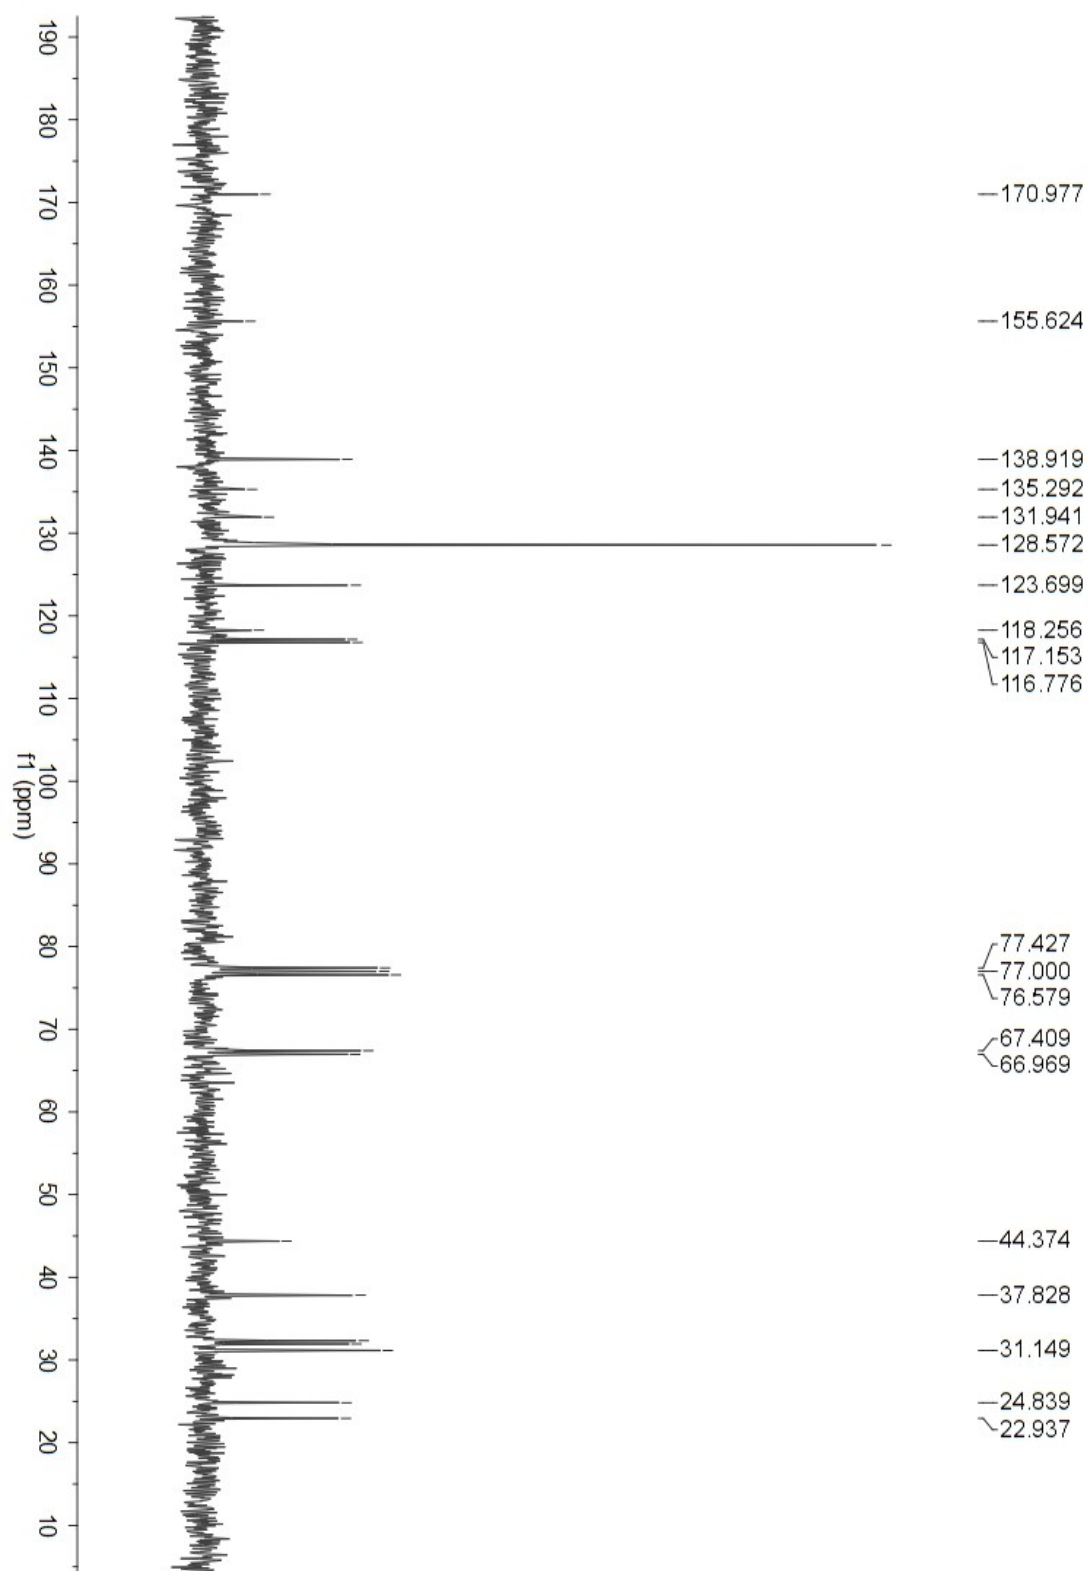

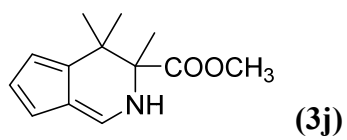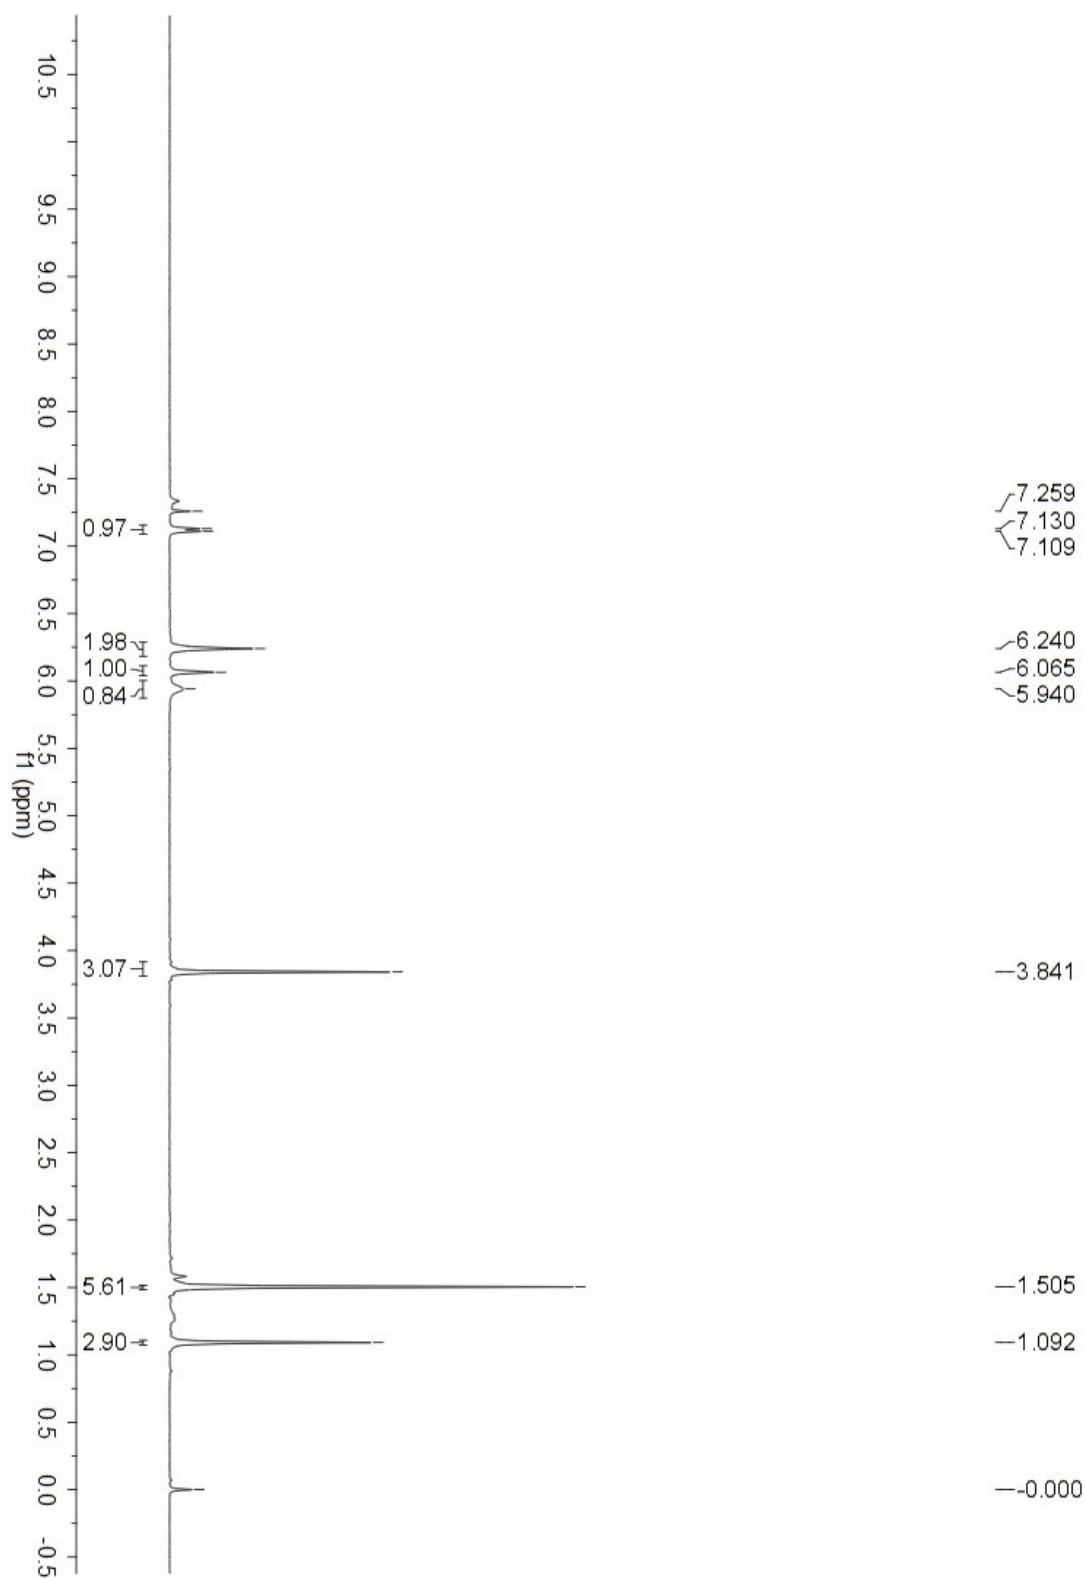

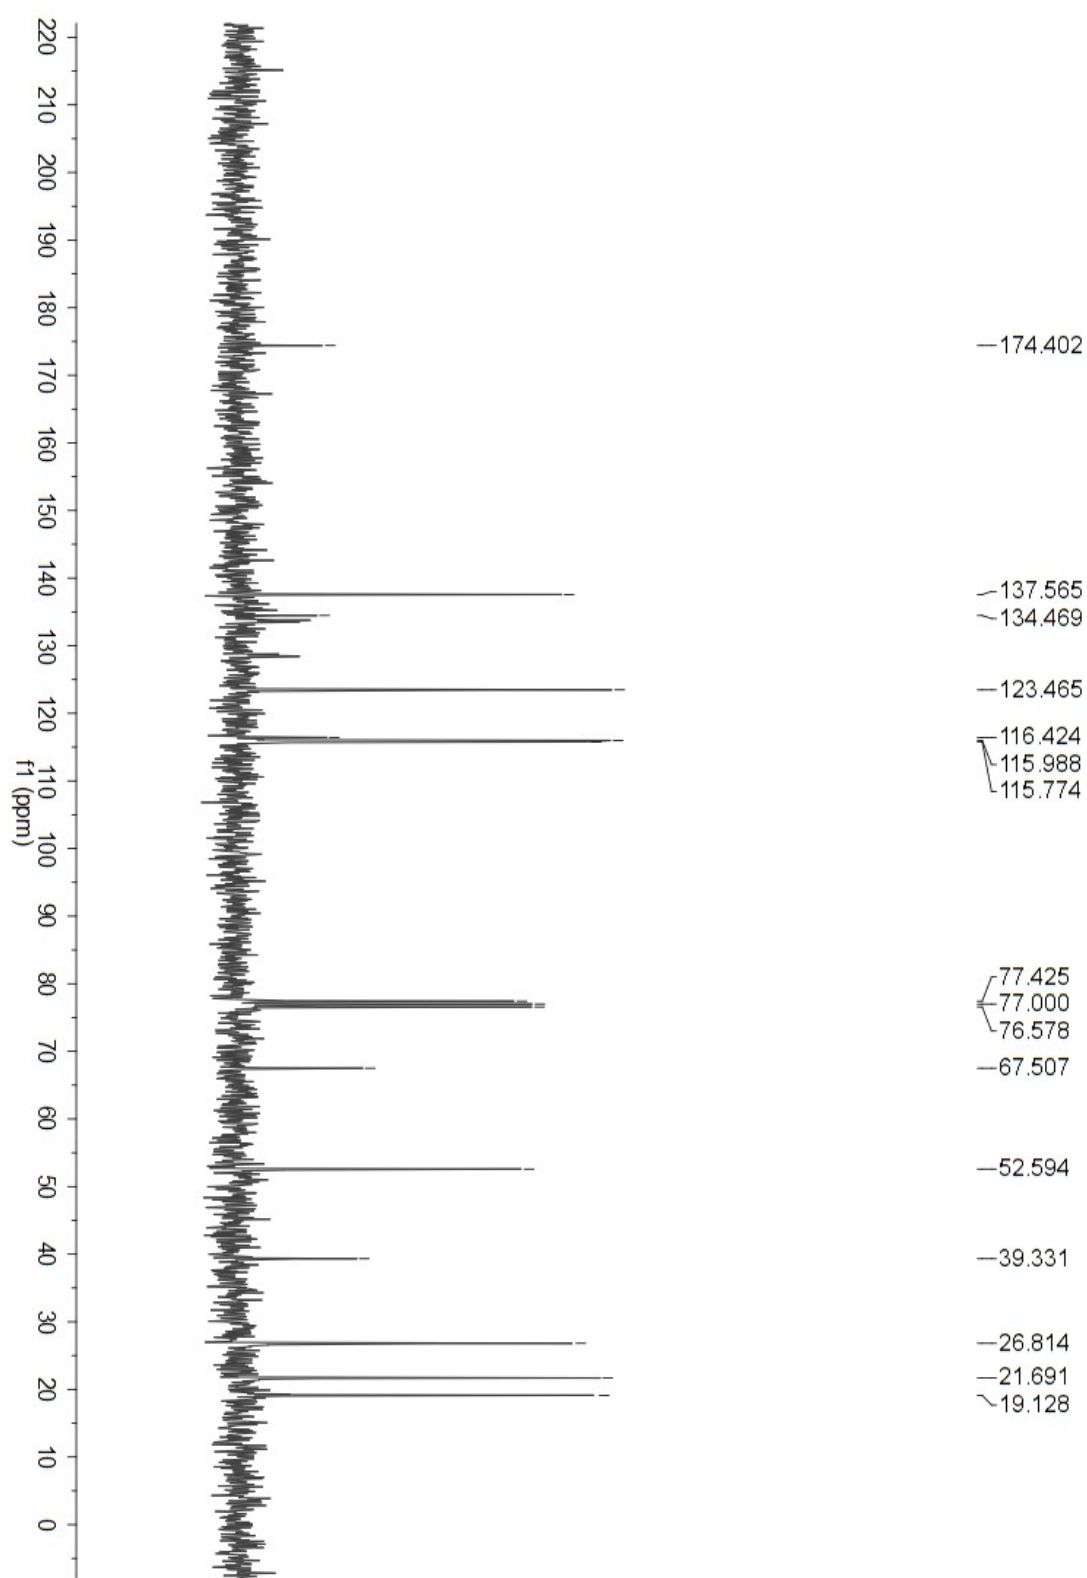

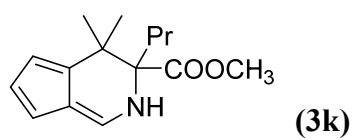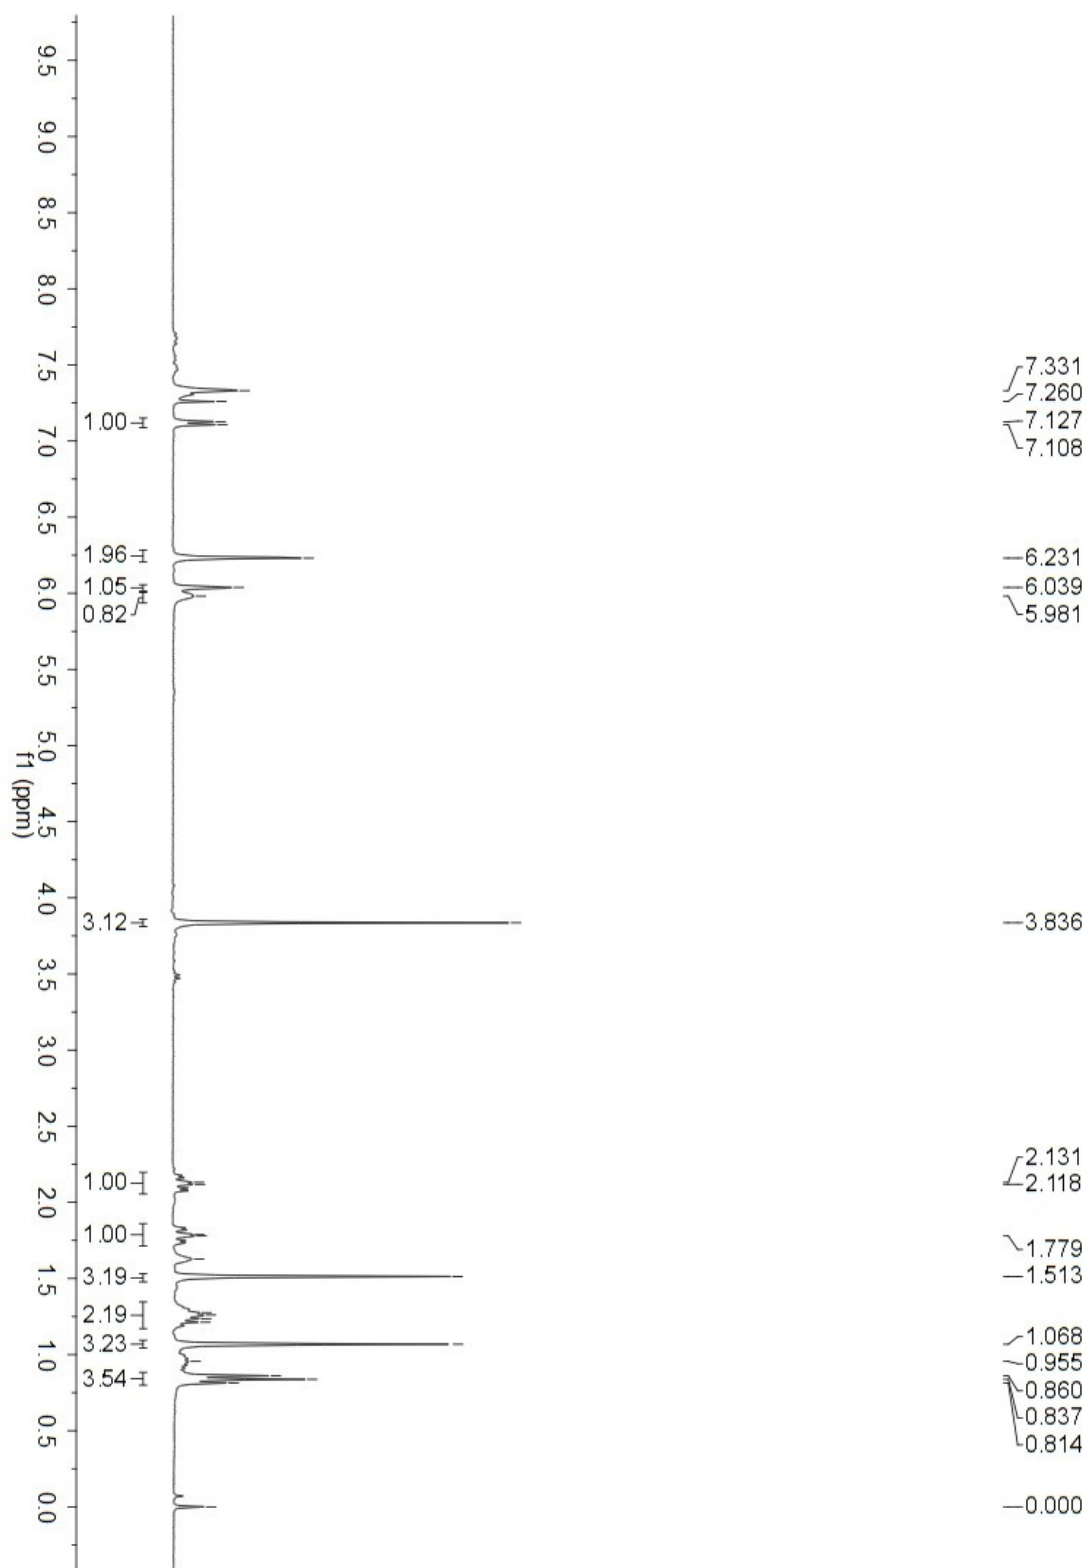



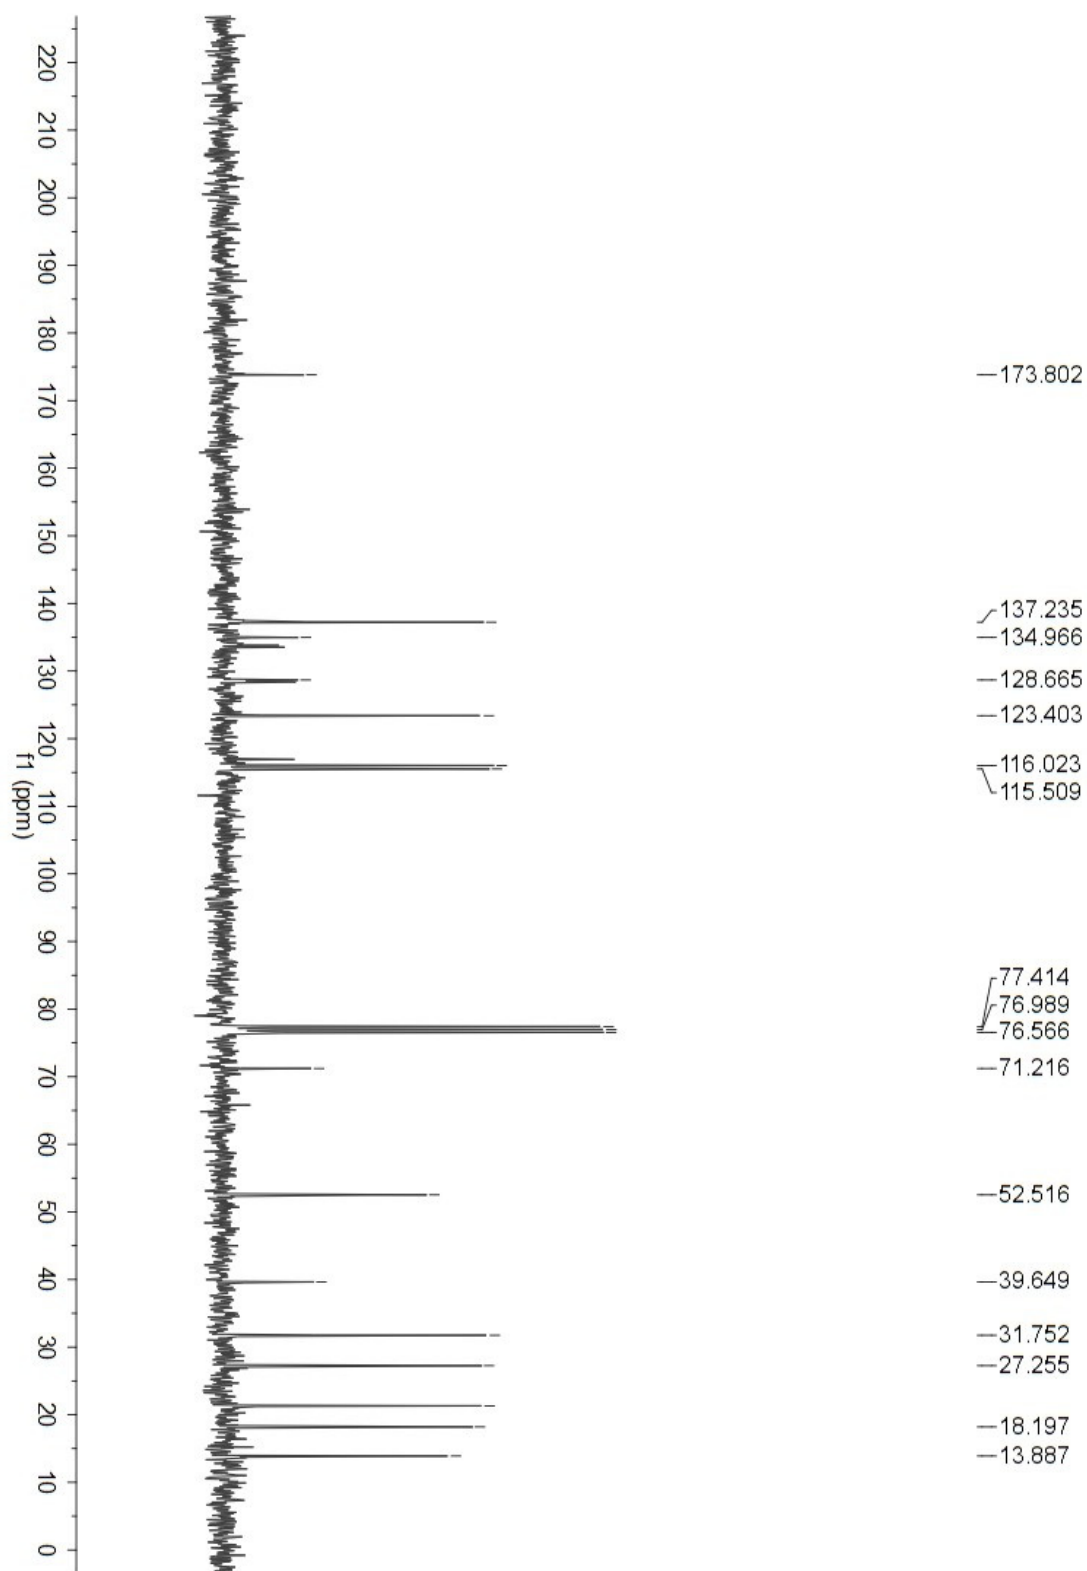

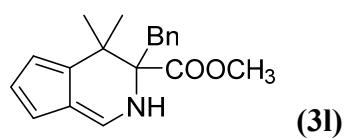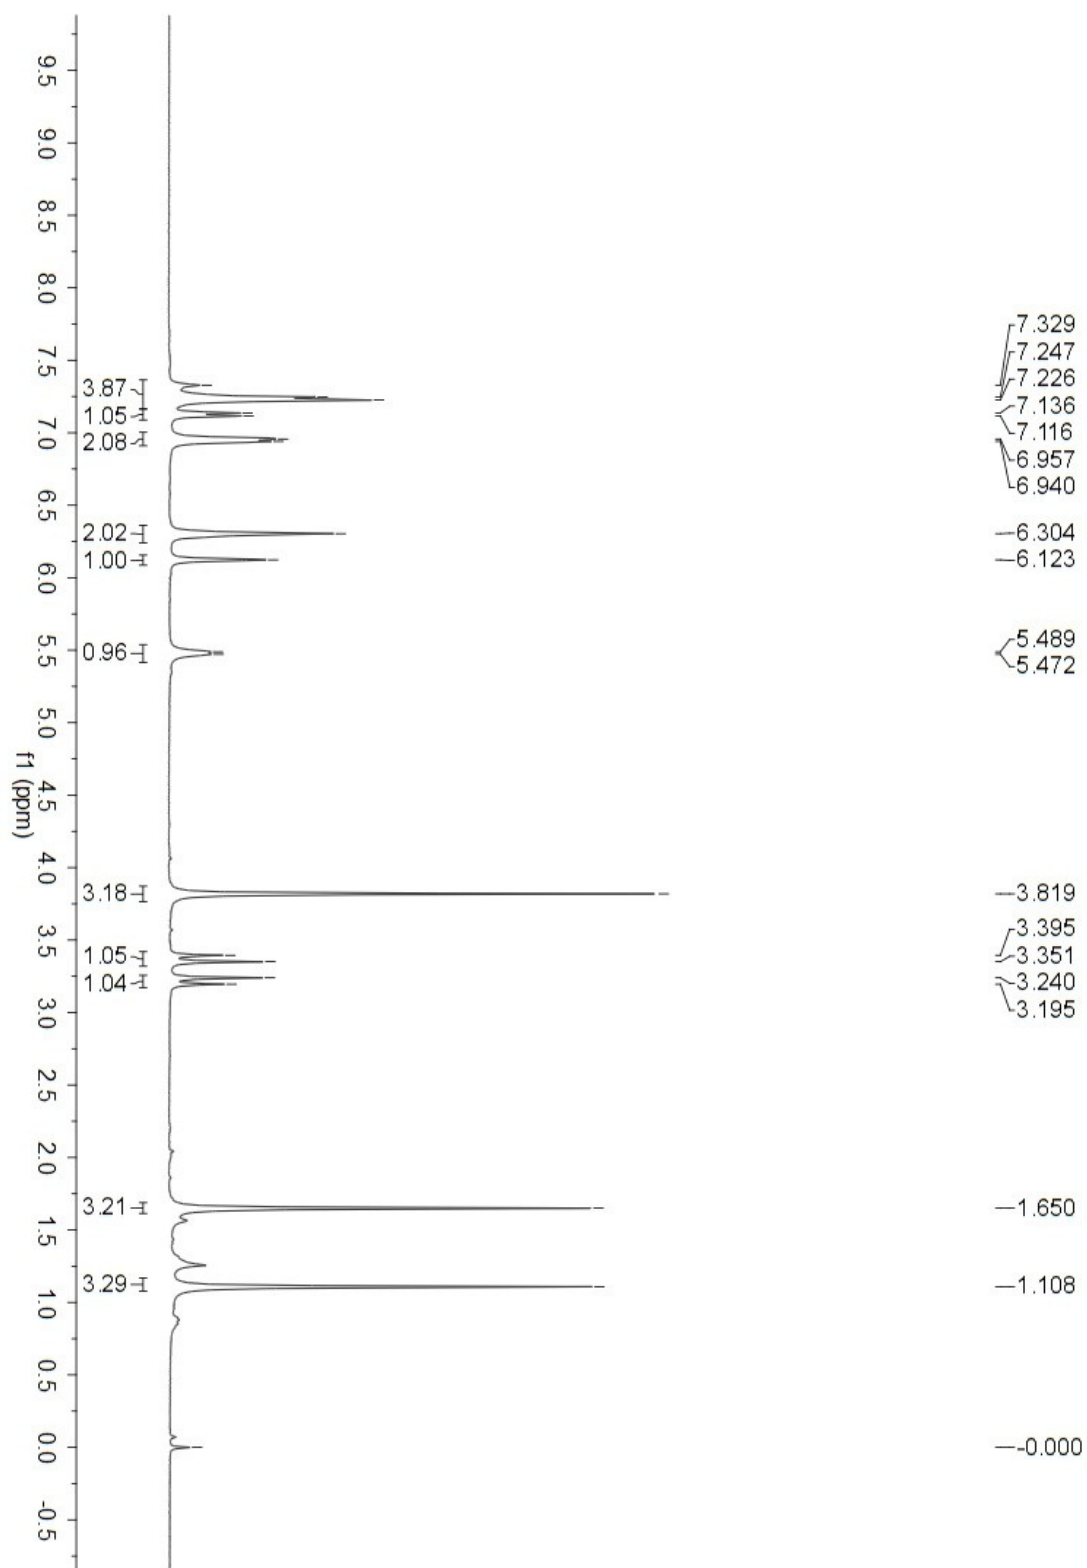

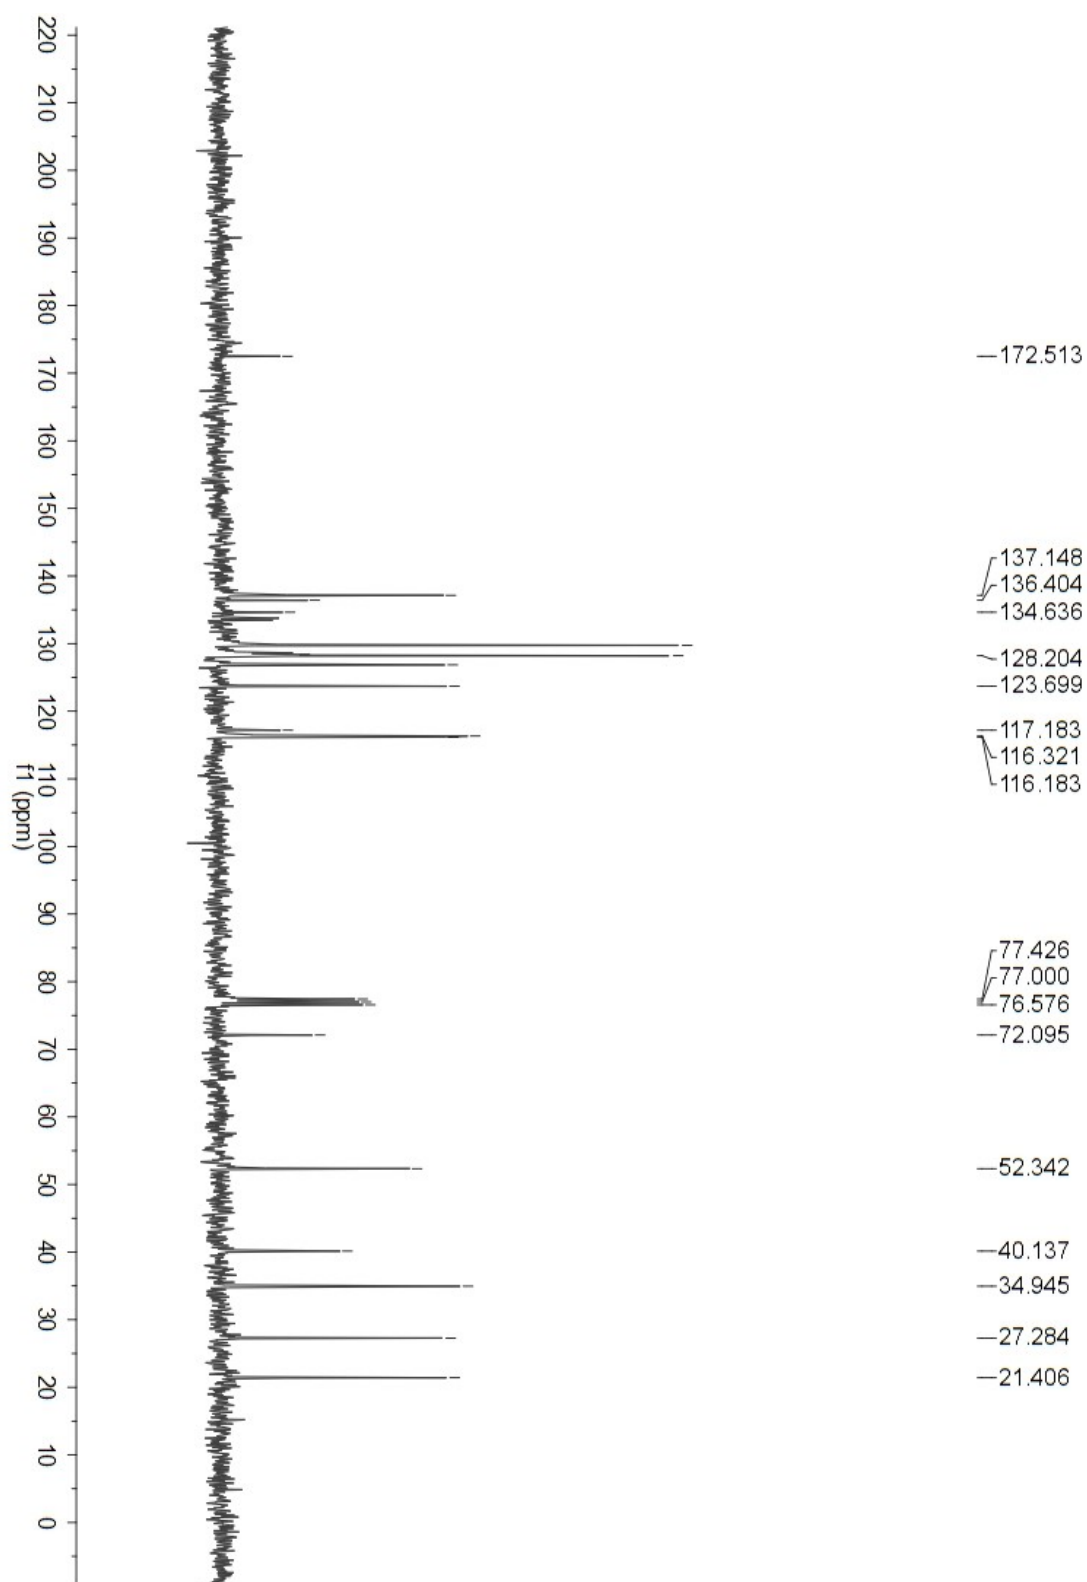

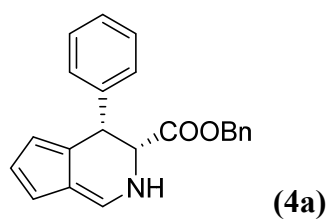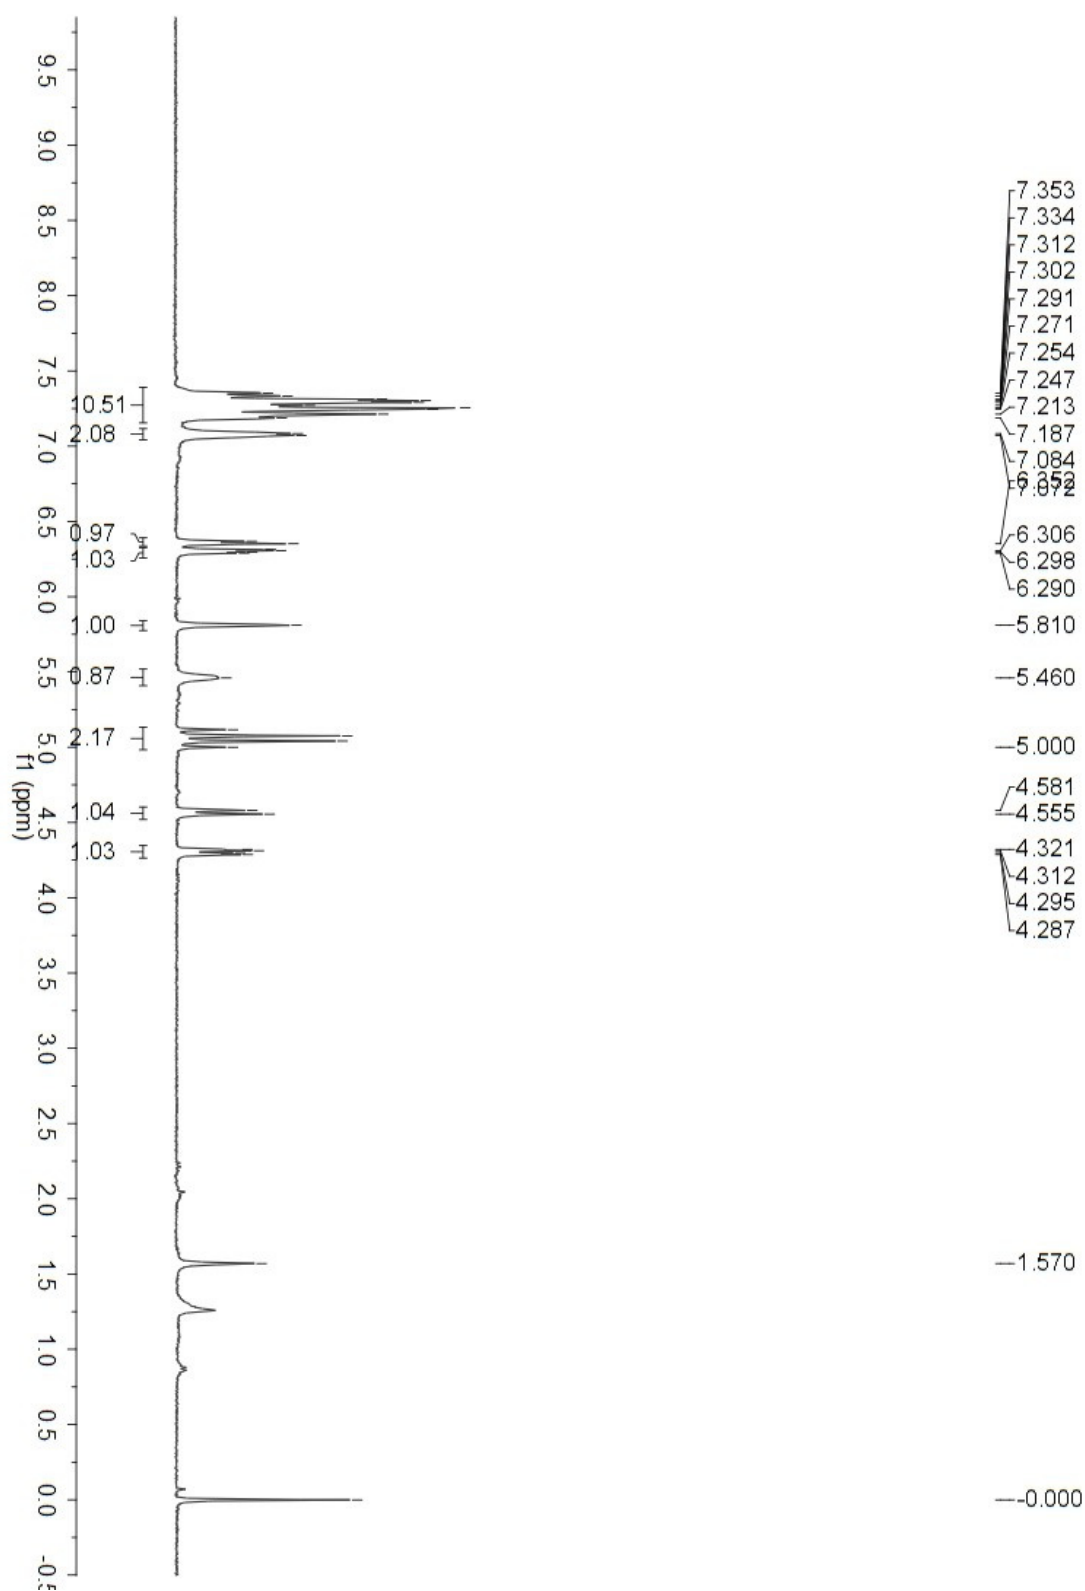

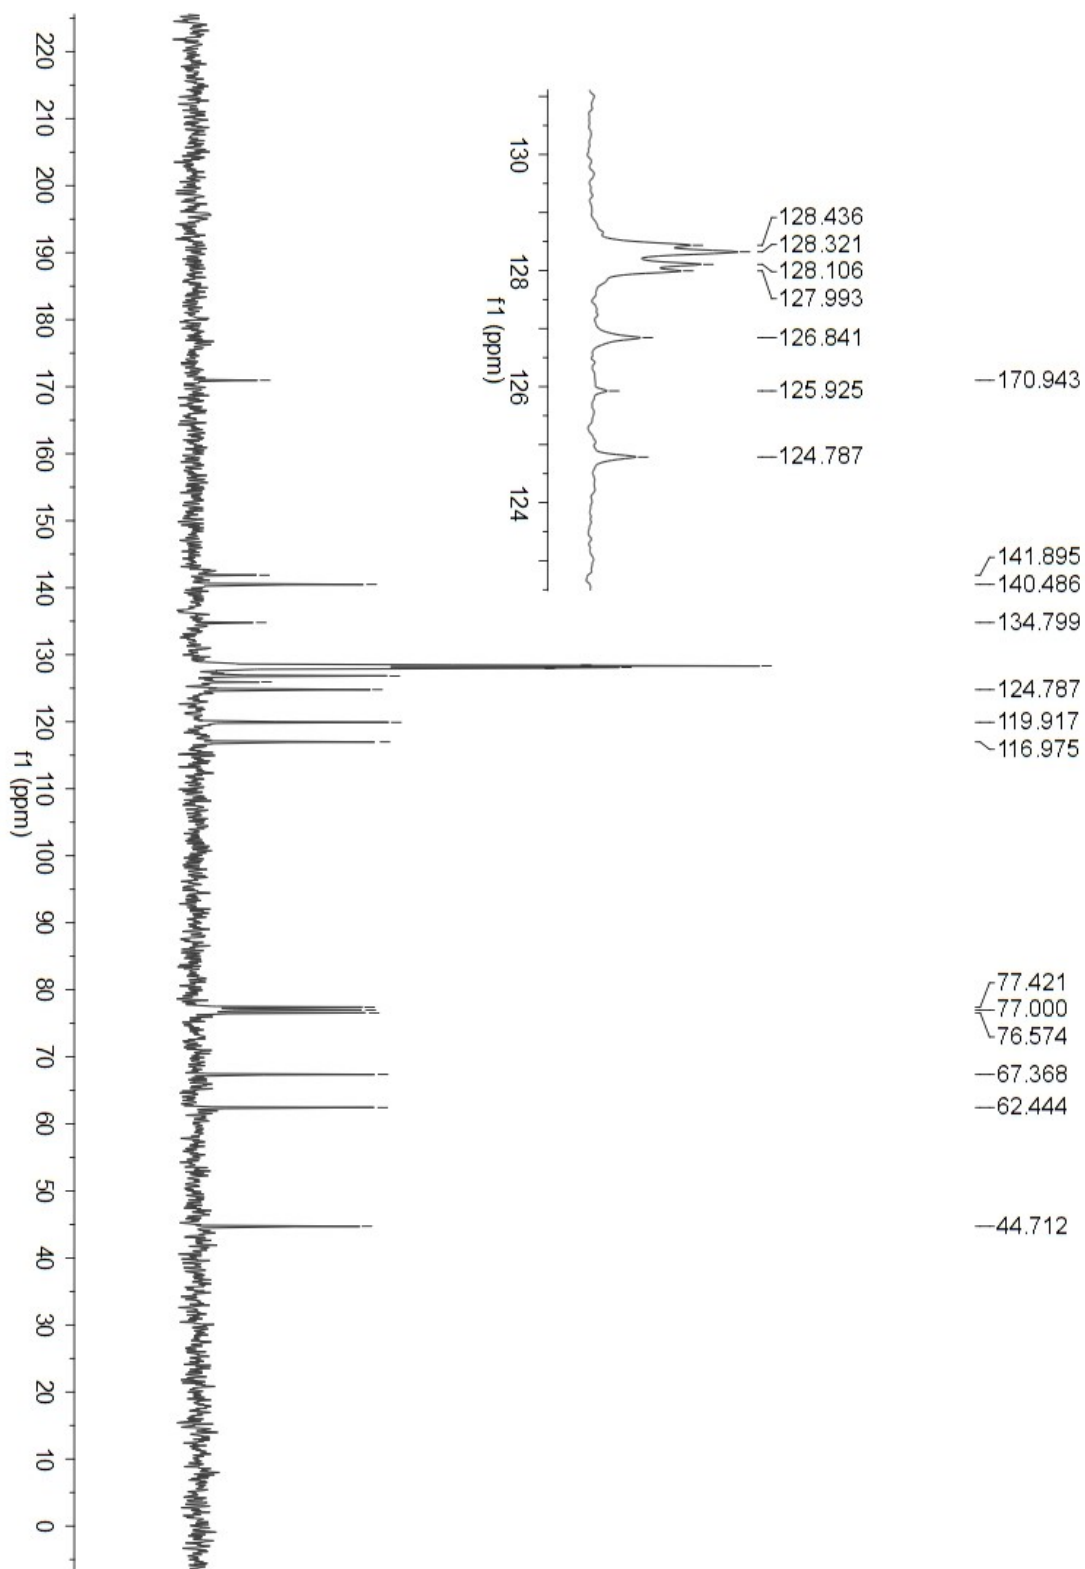

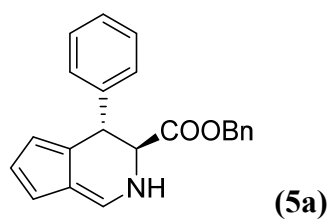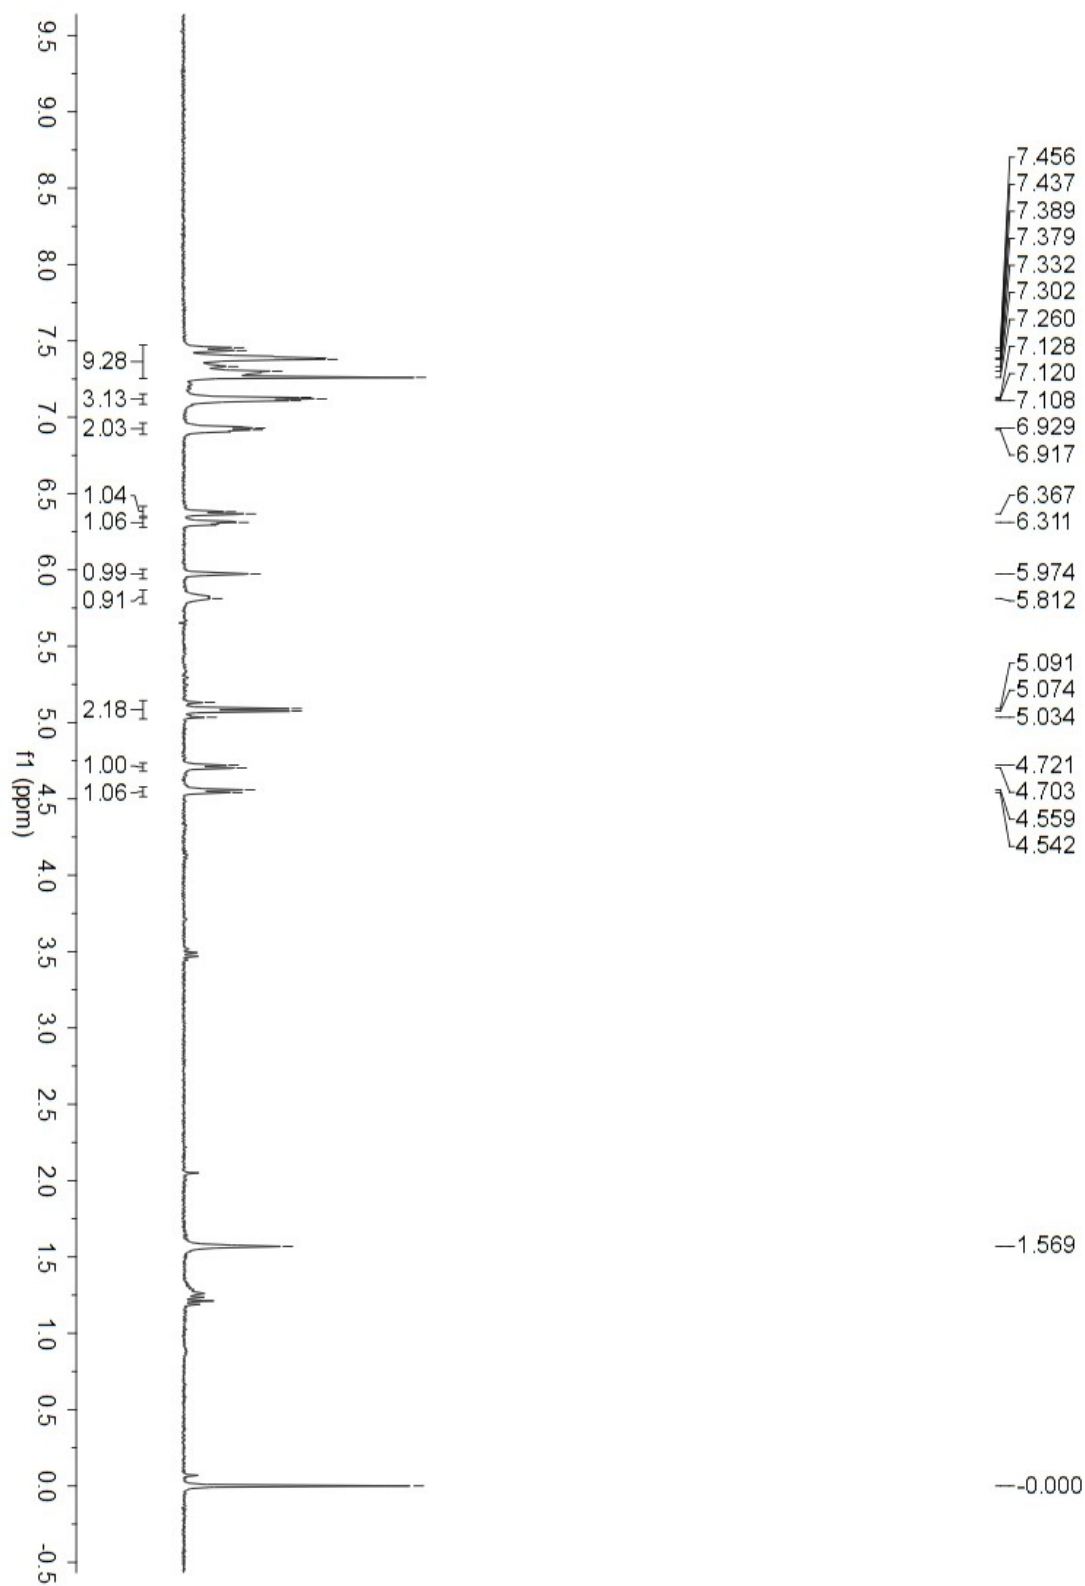

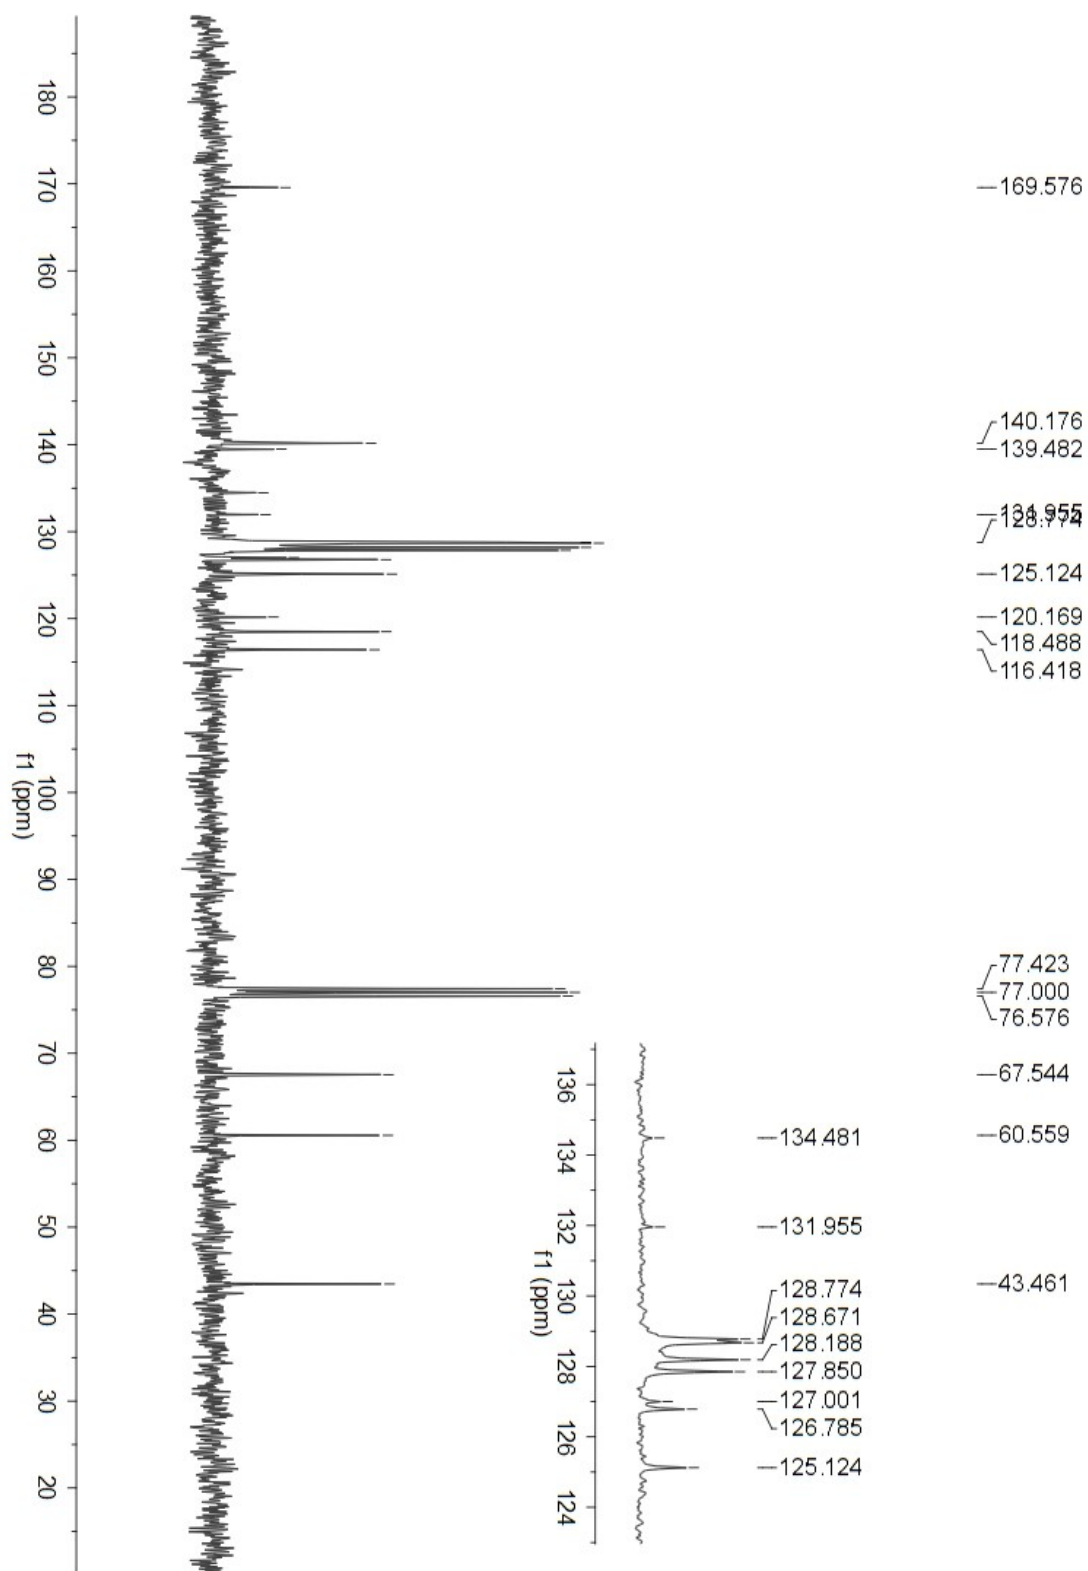

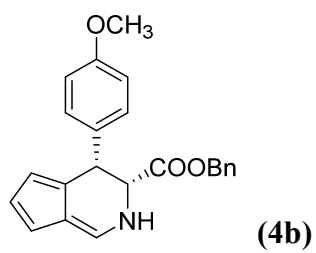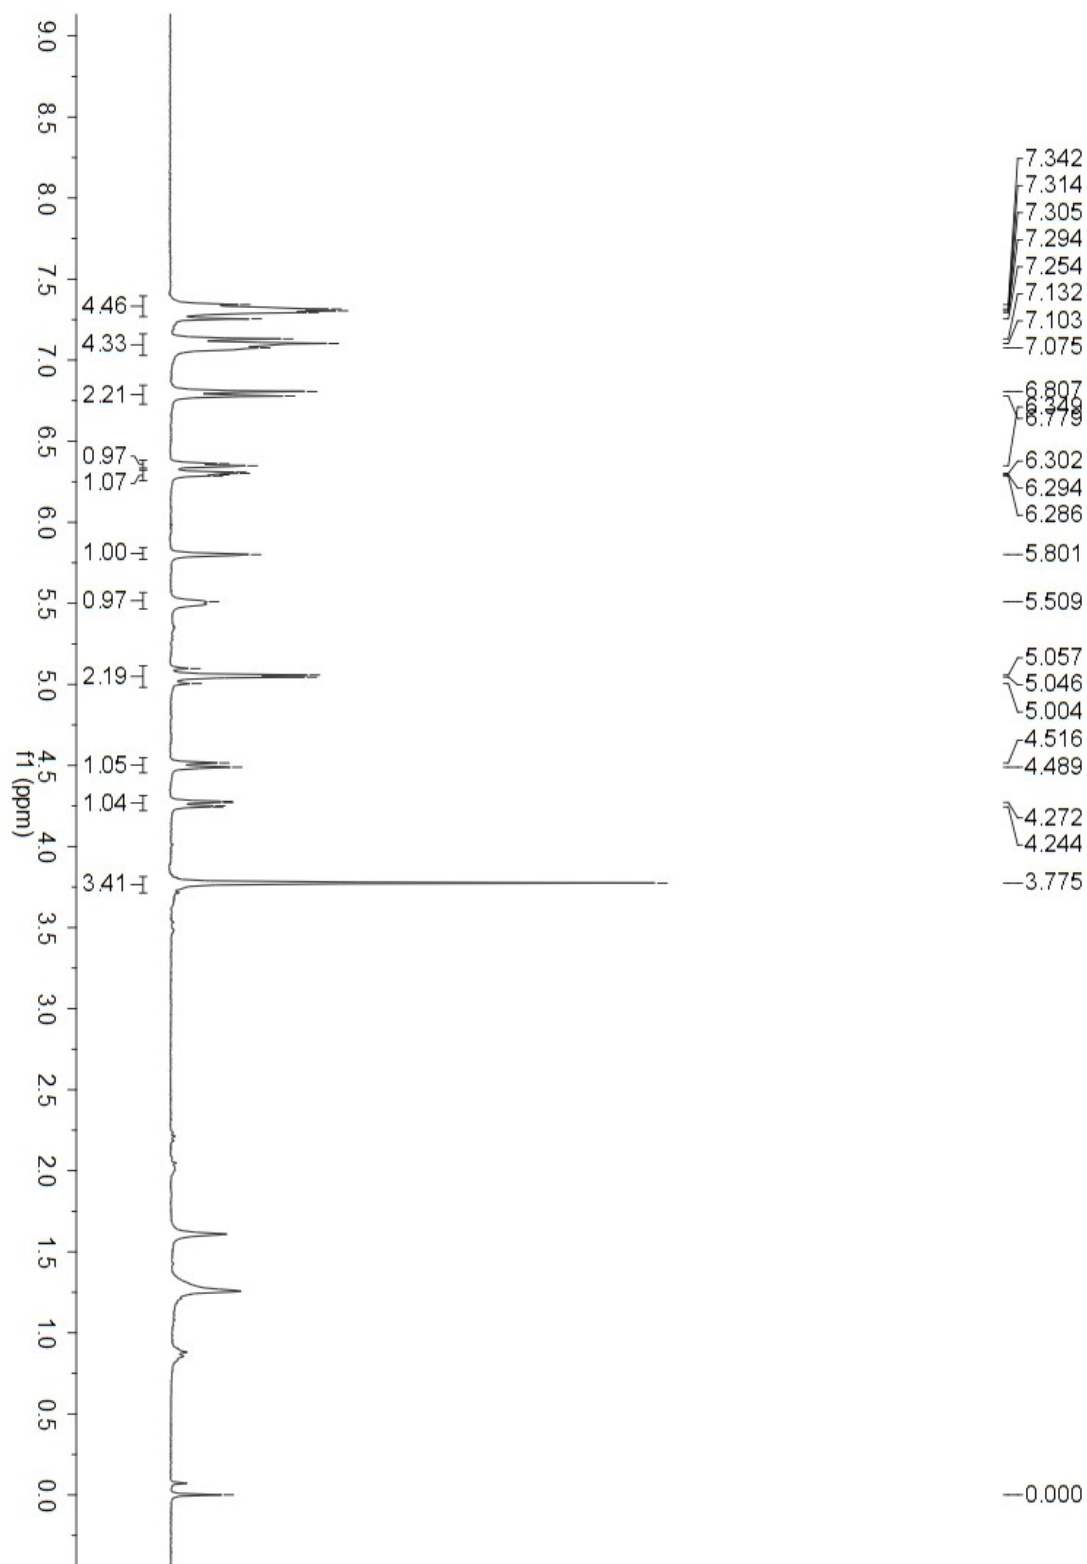



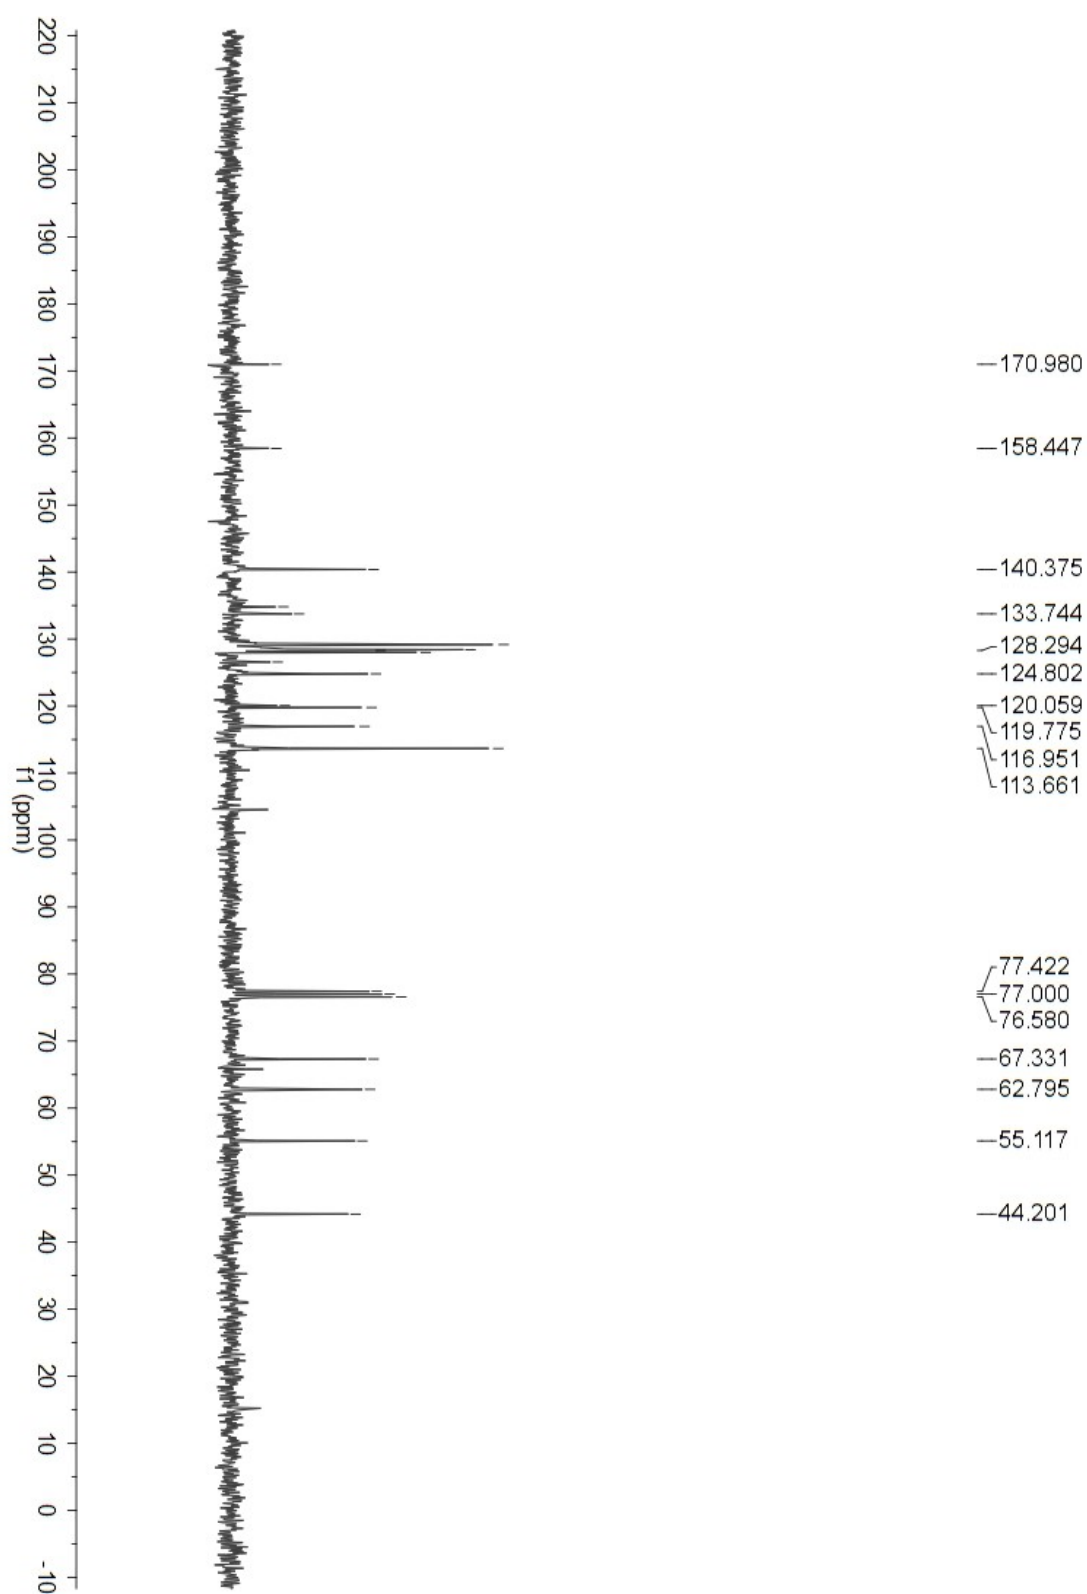

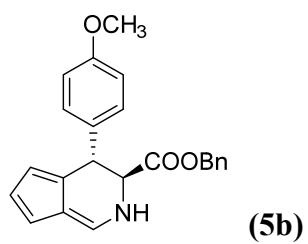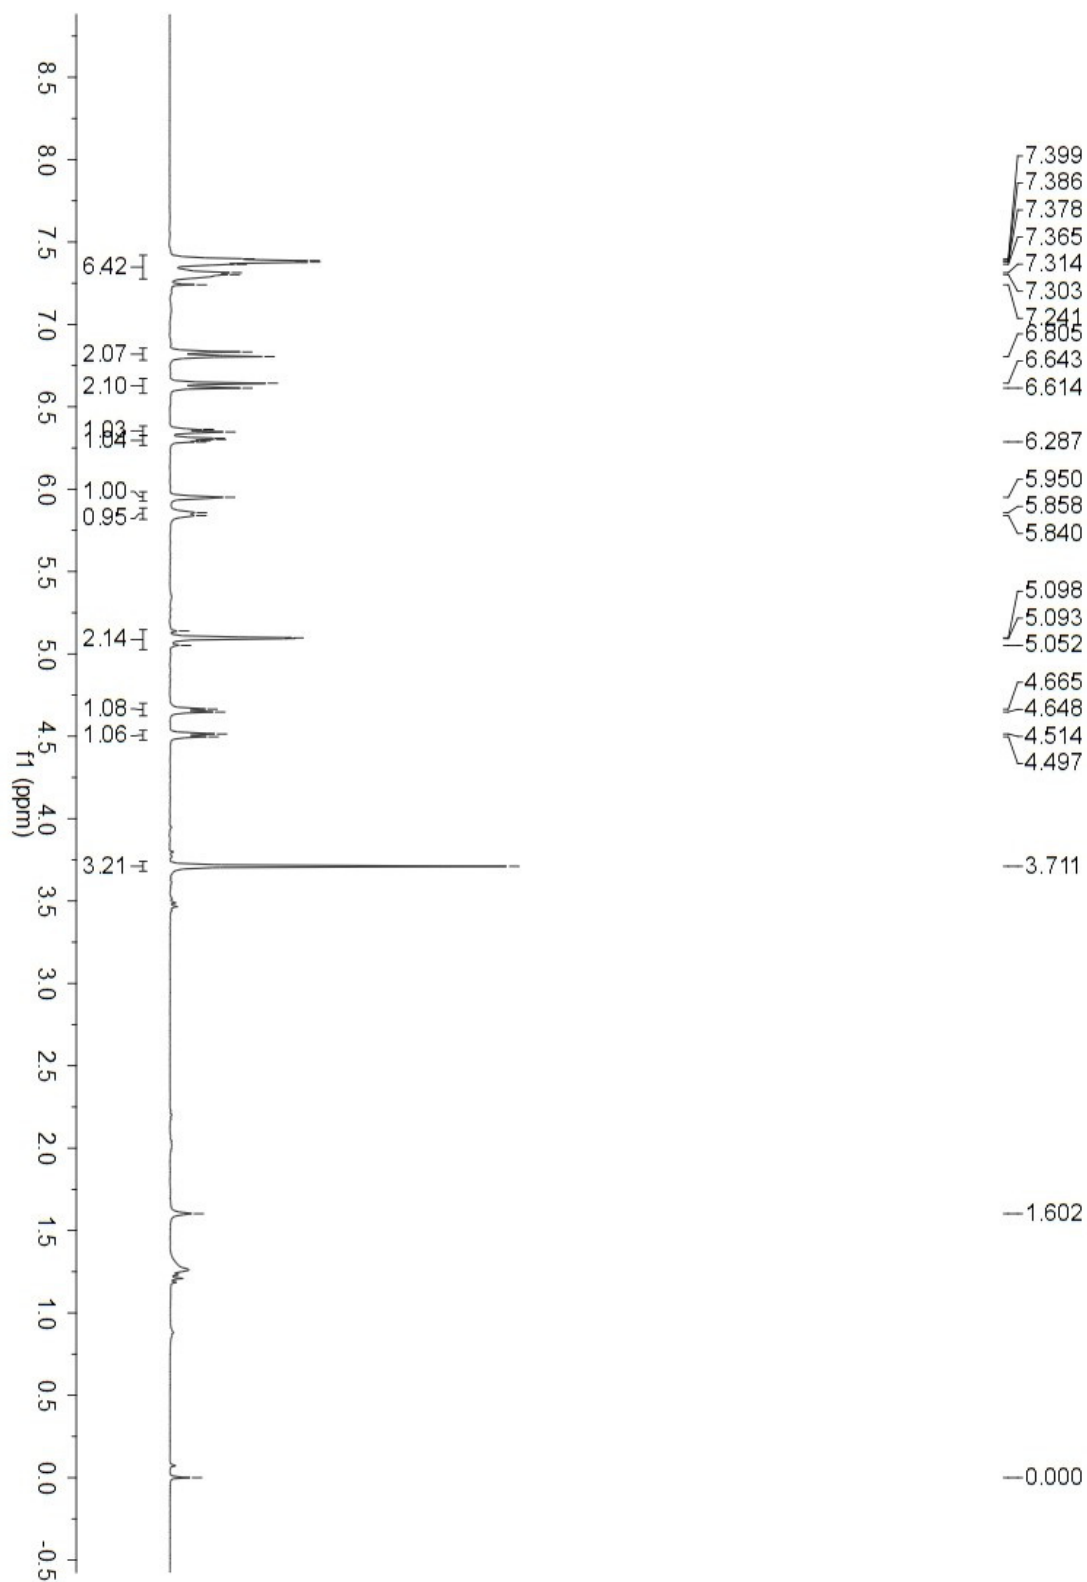

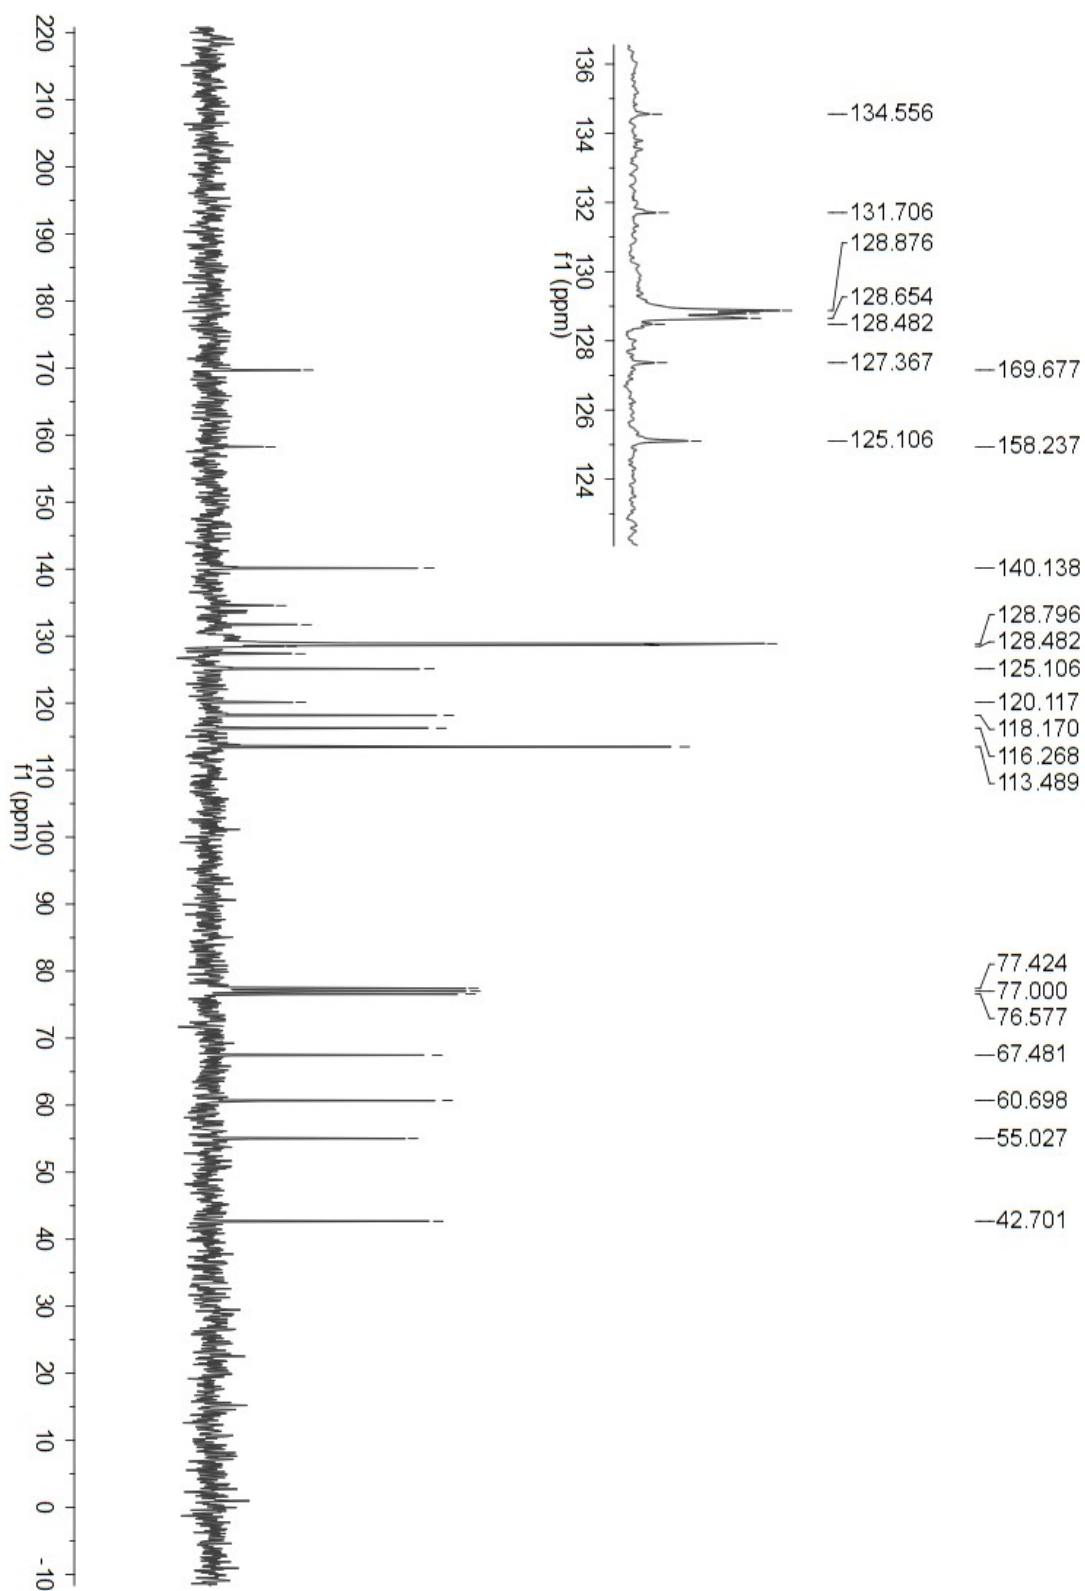

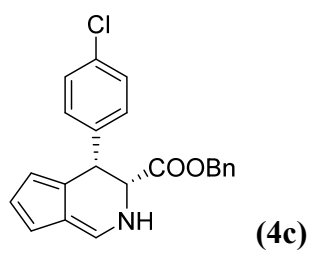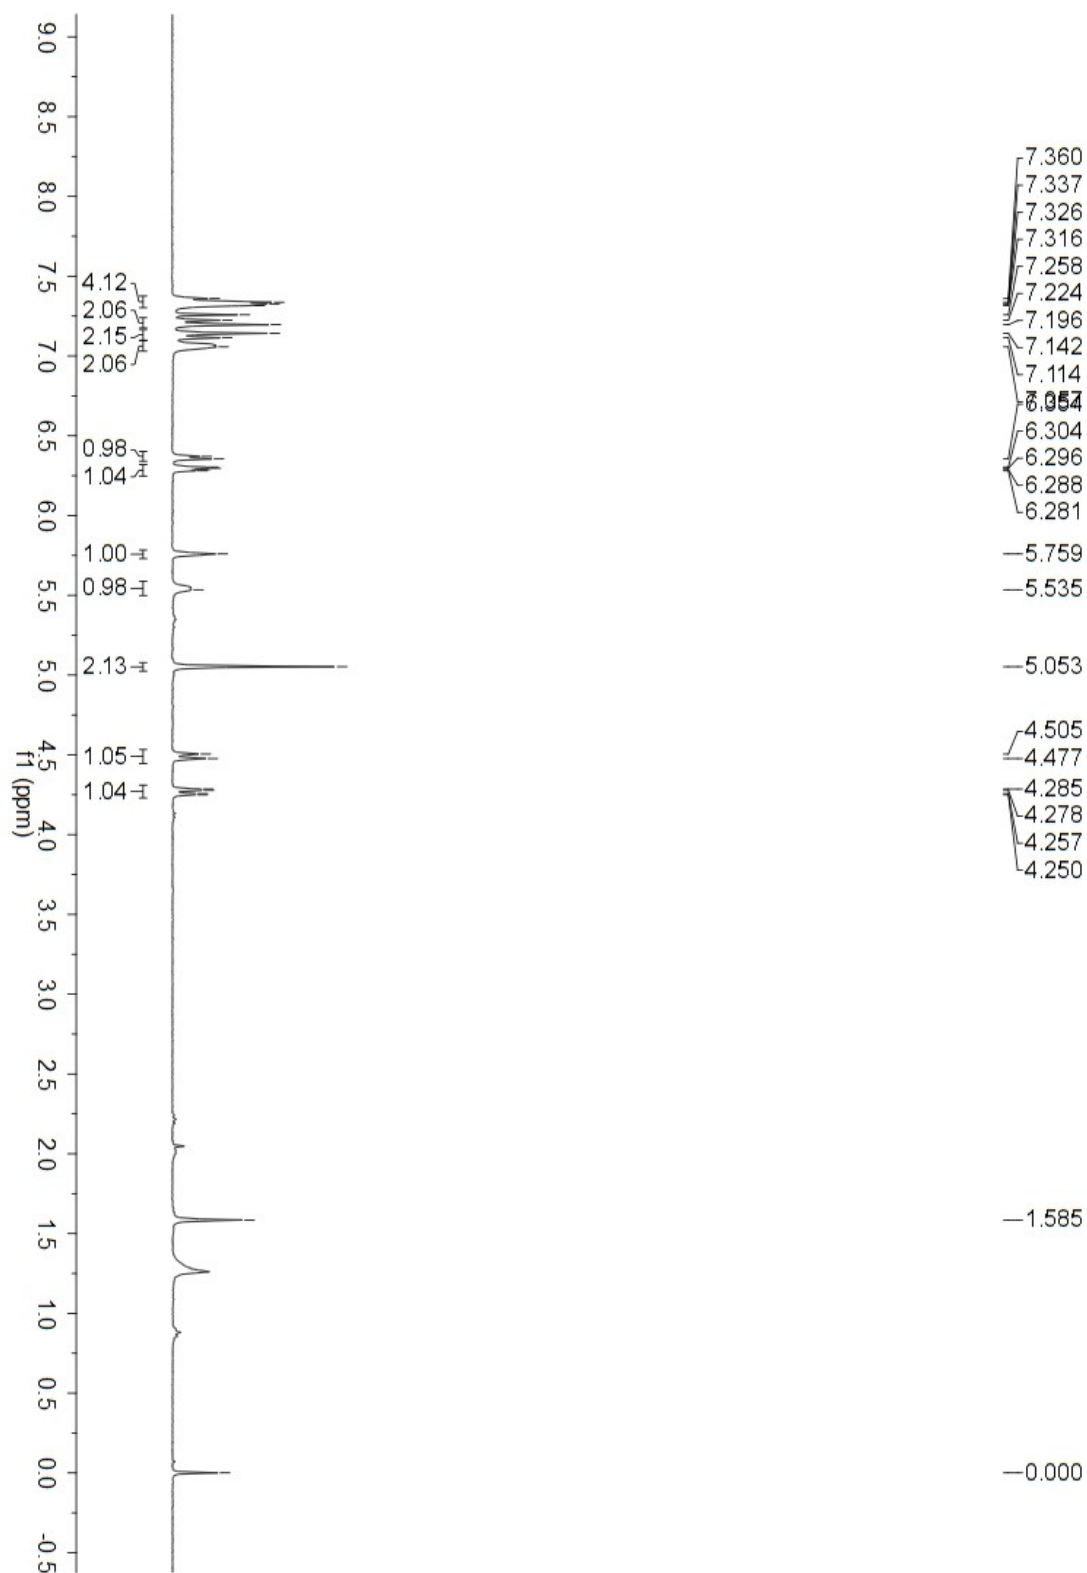

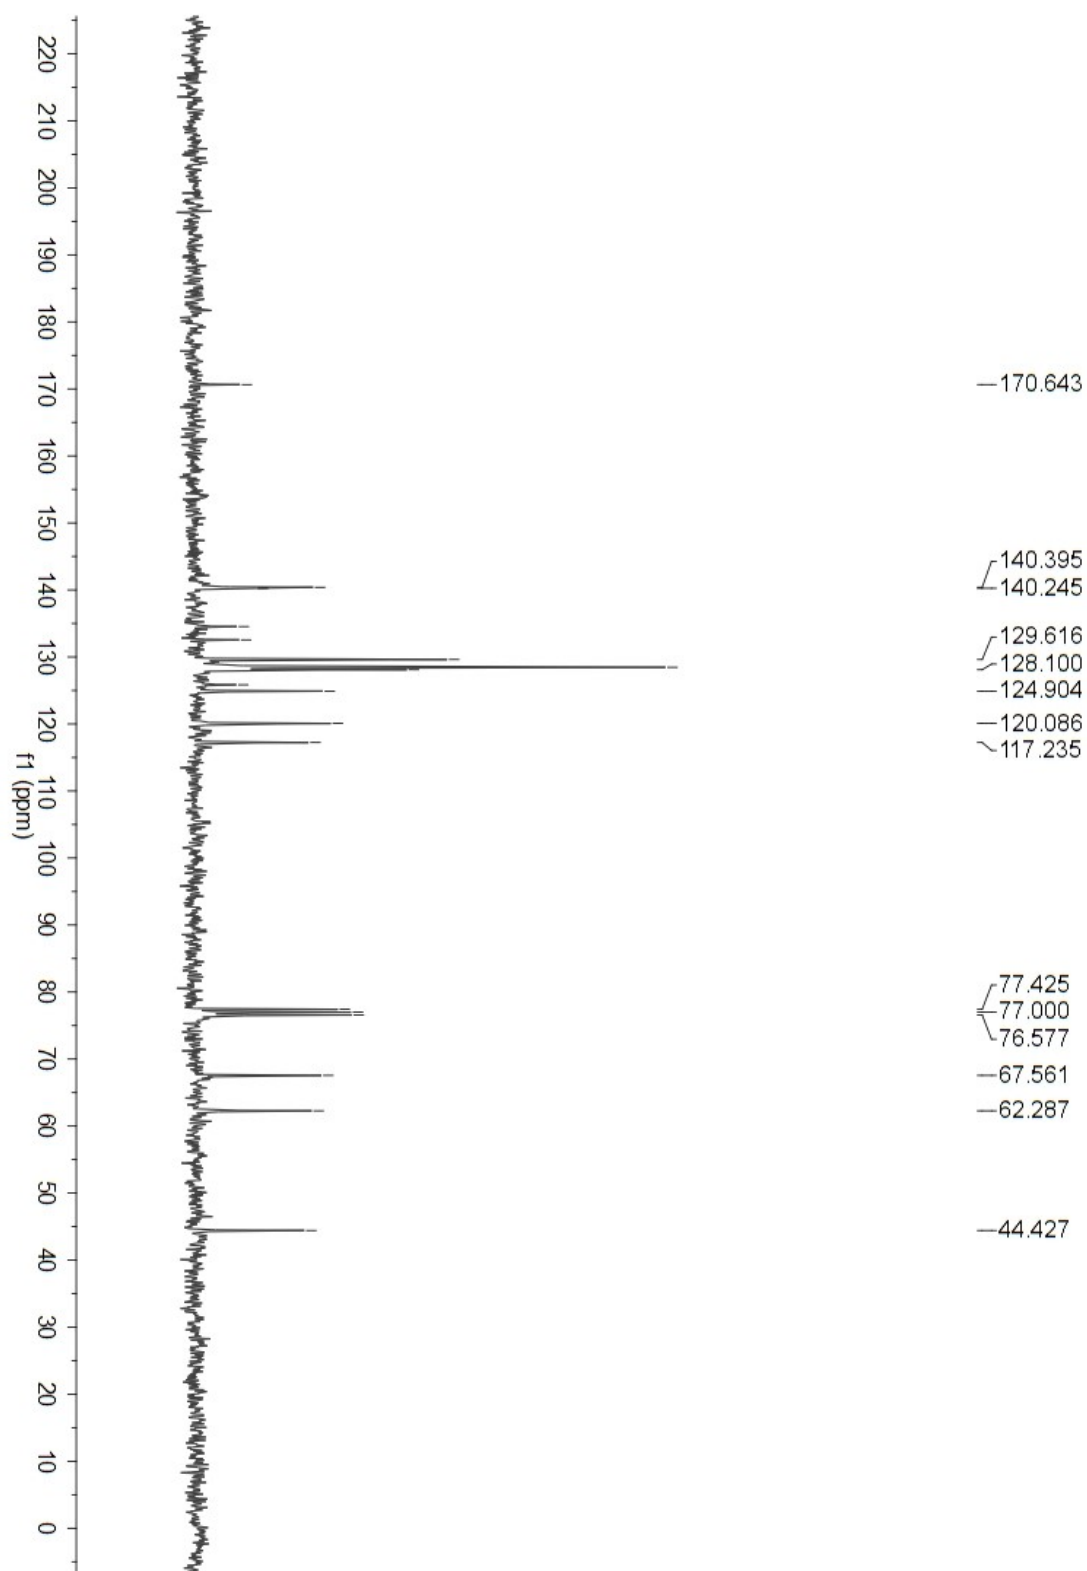

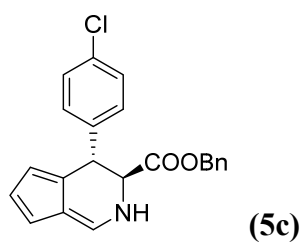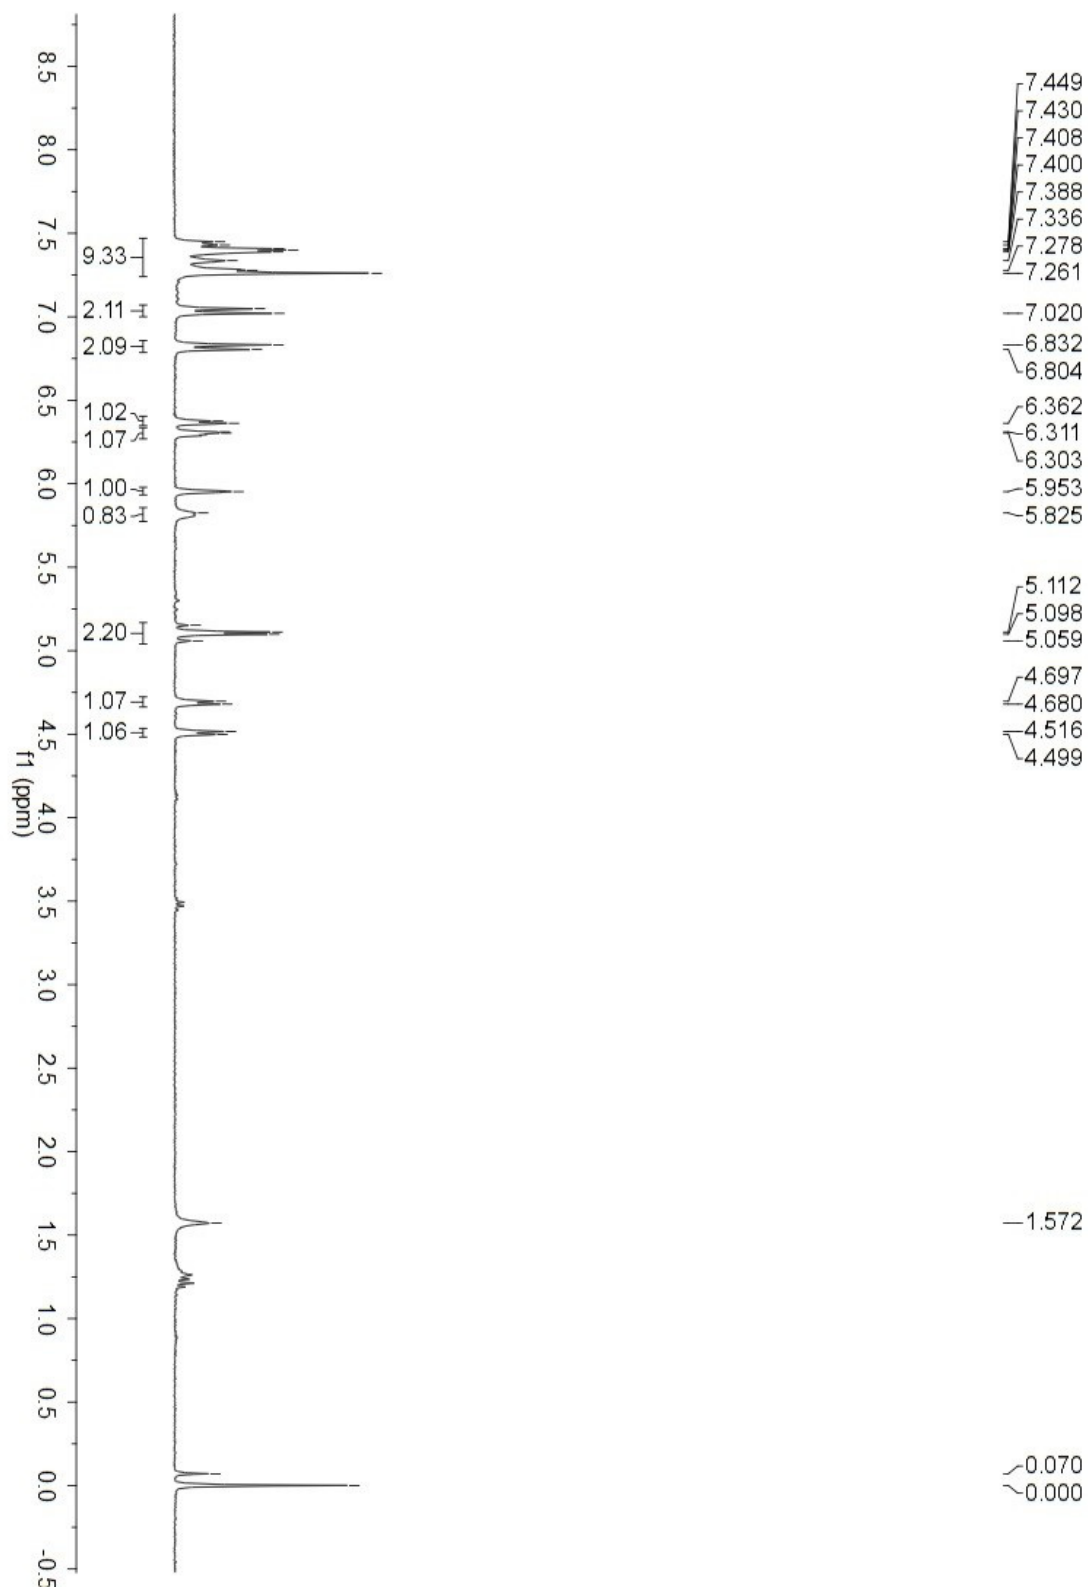

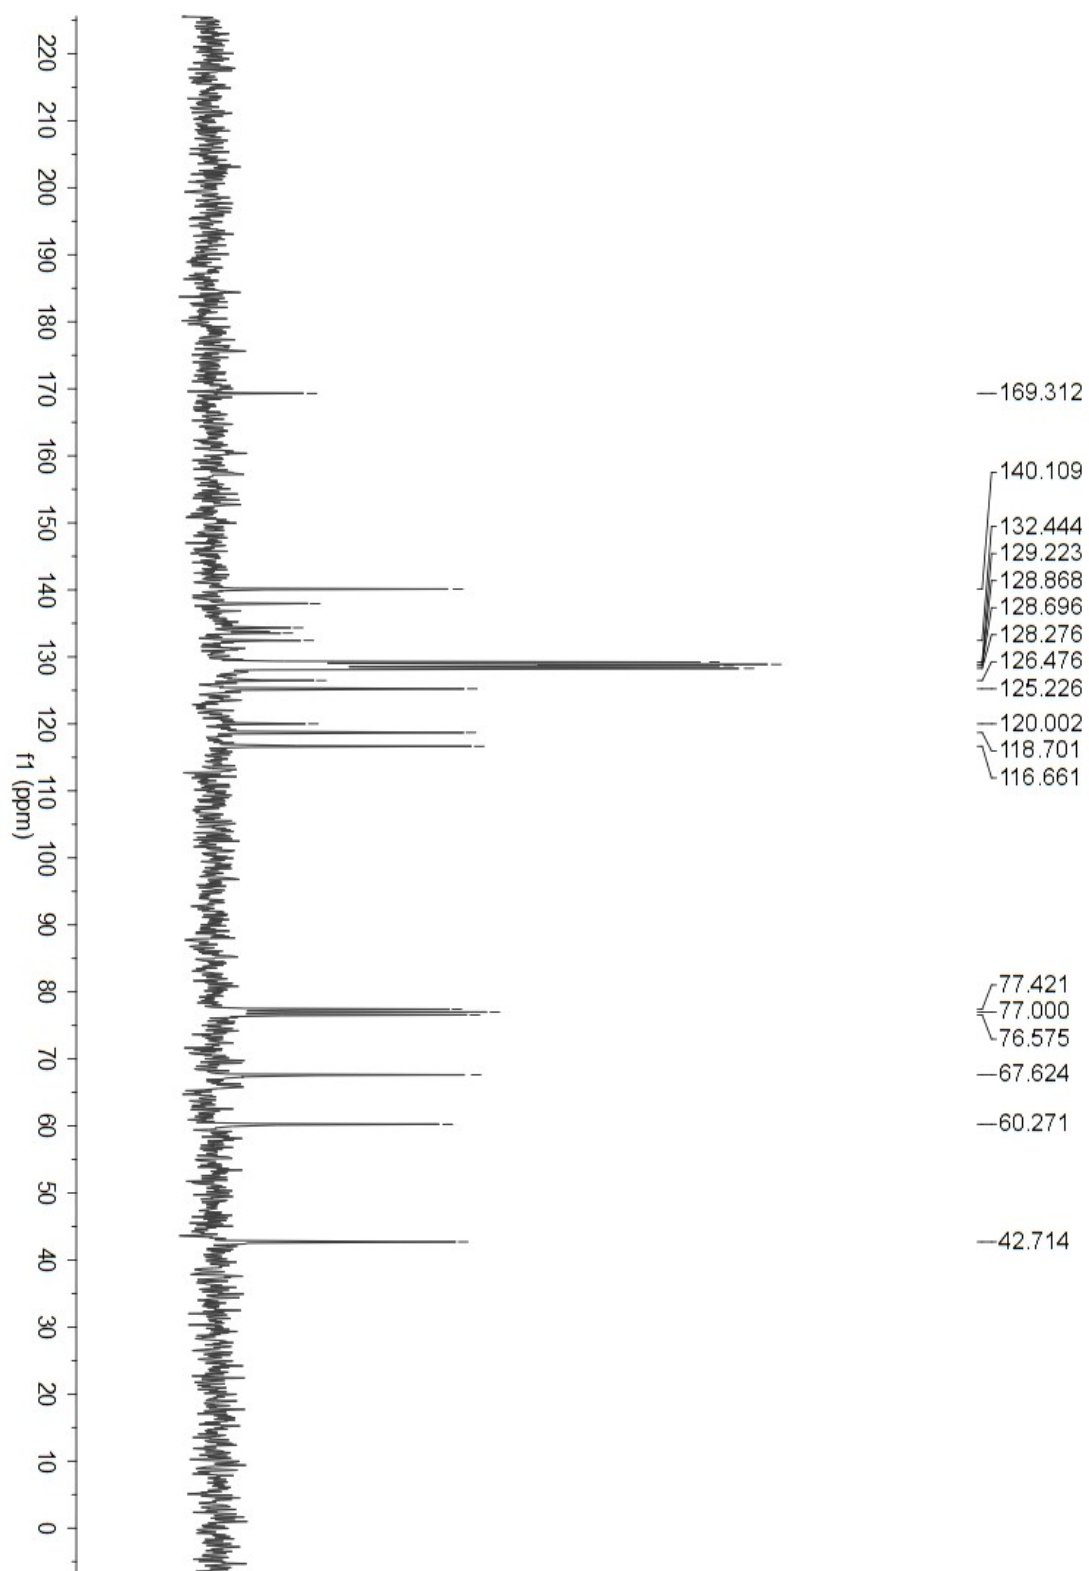

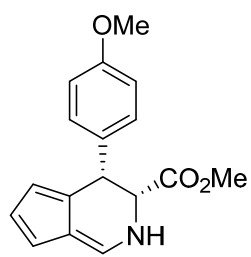

(4d)

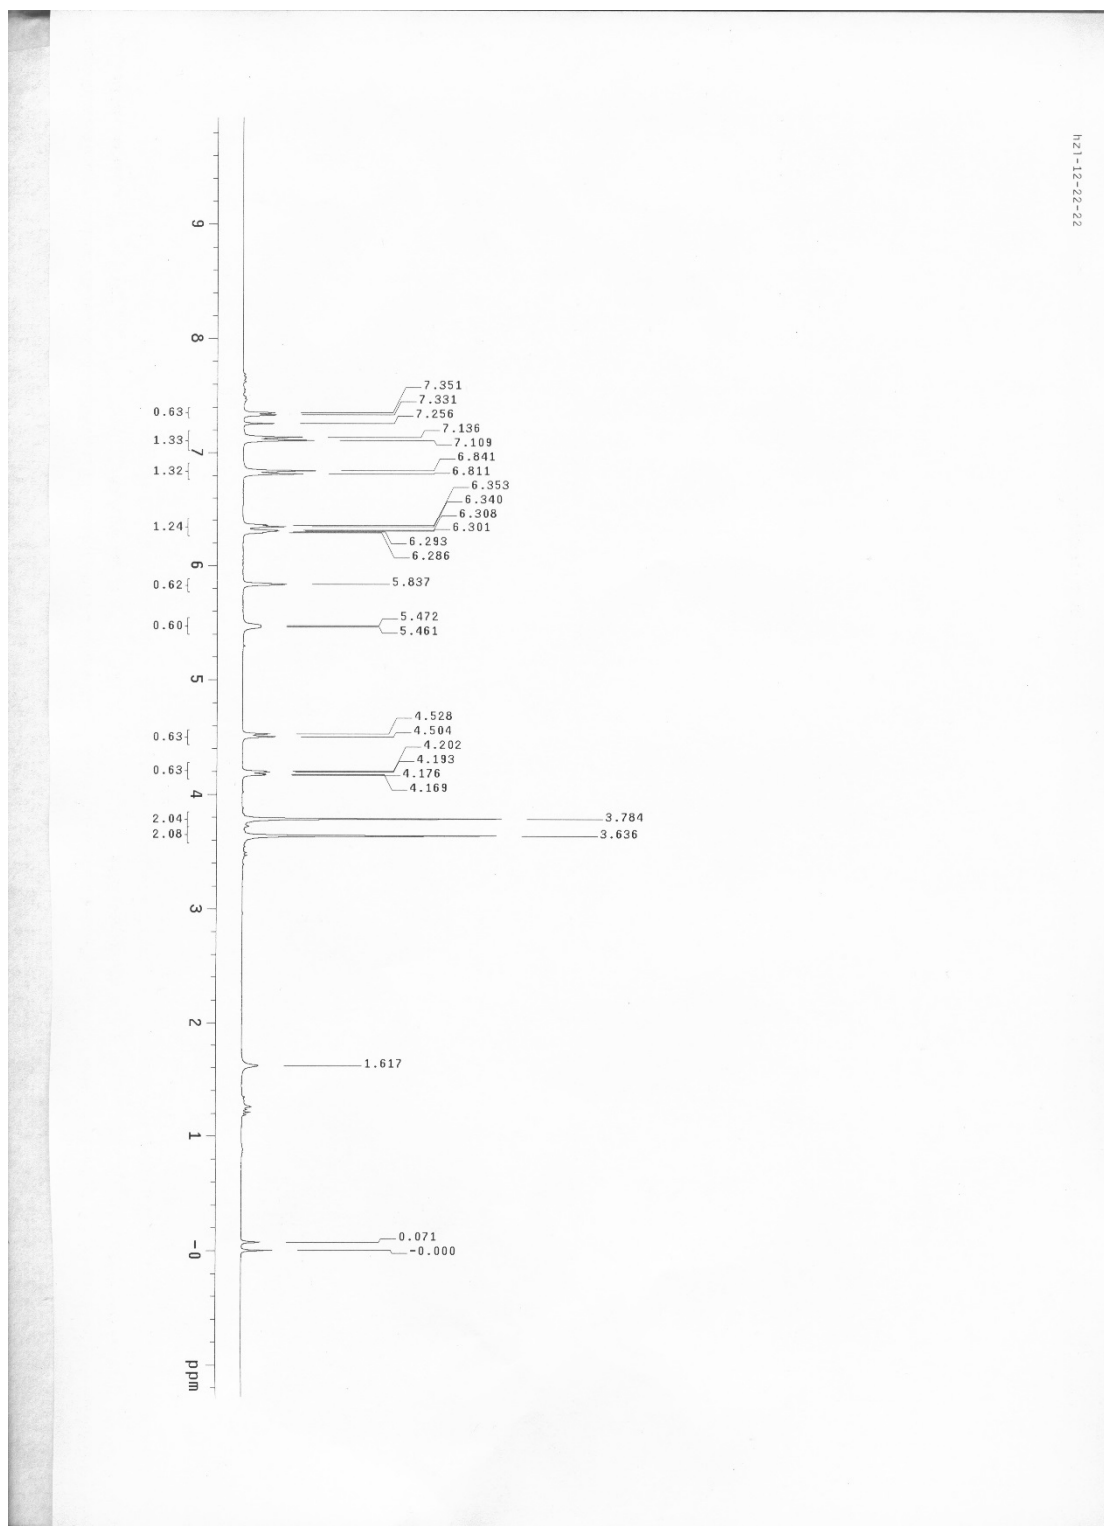



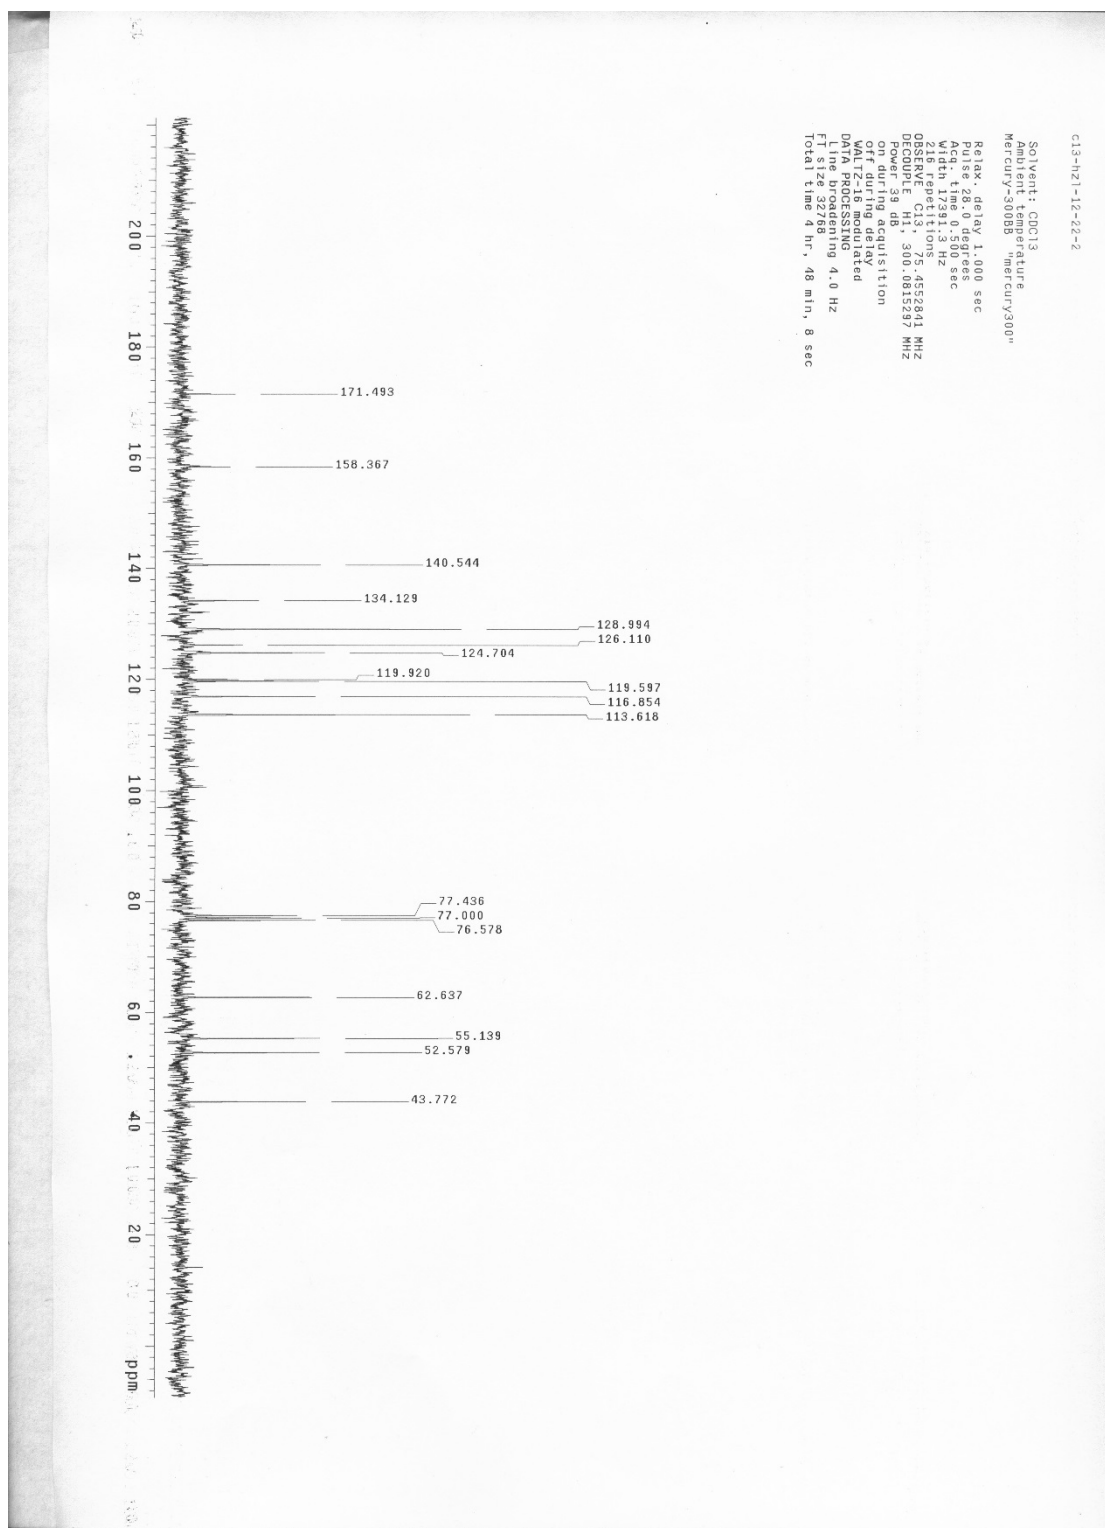

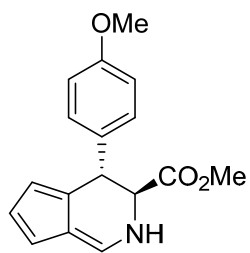

(5d)

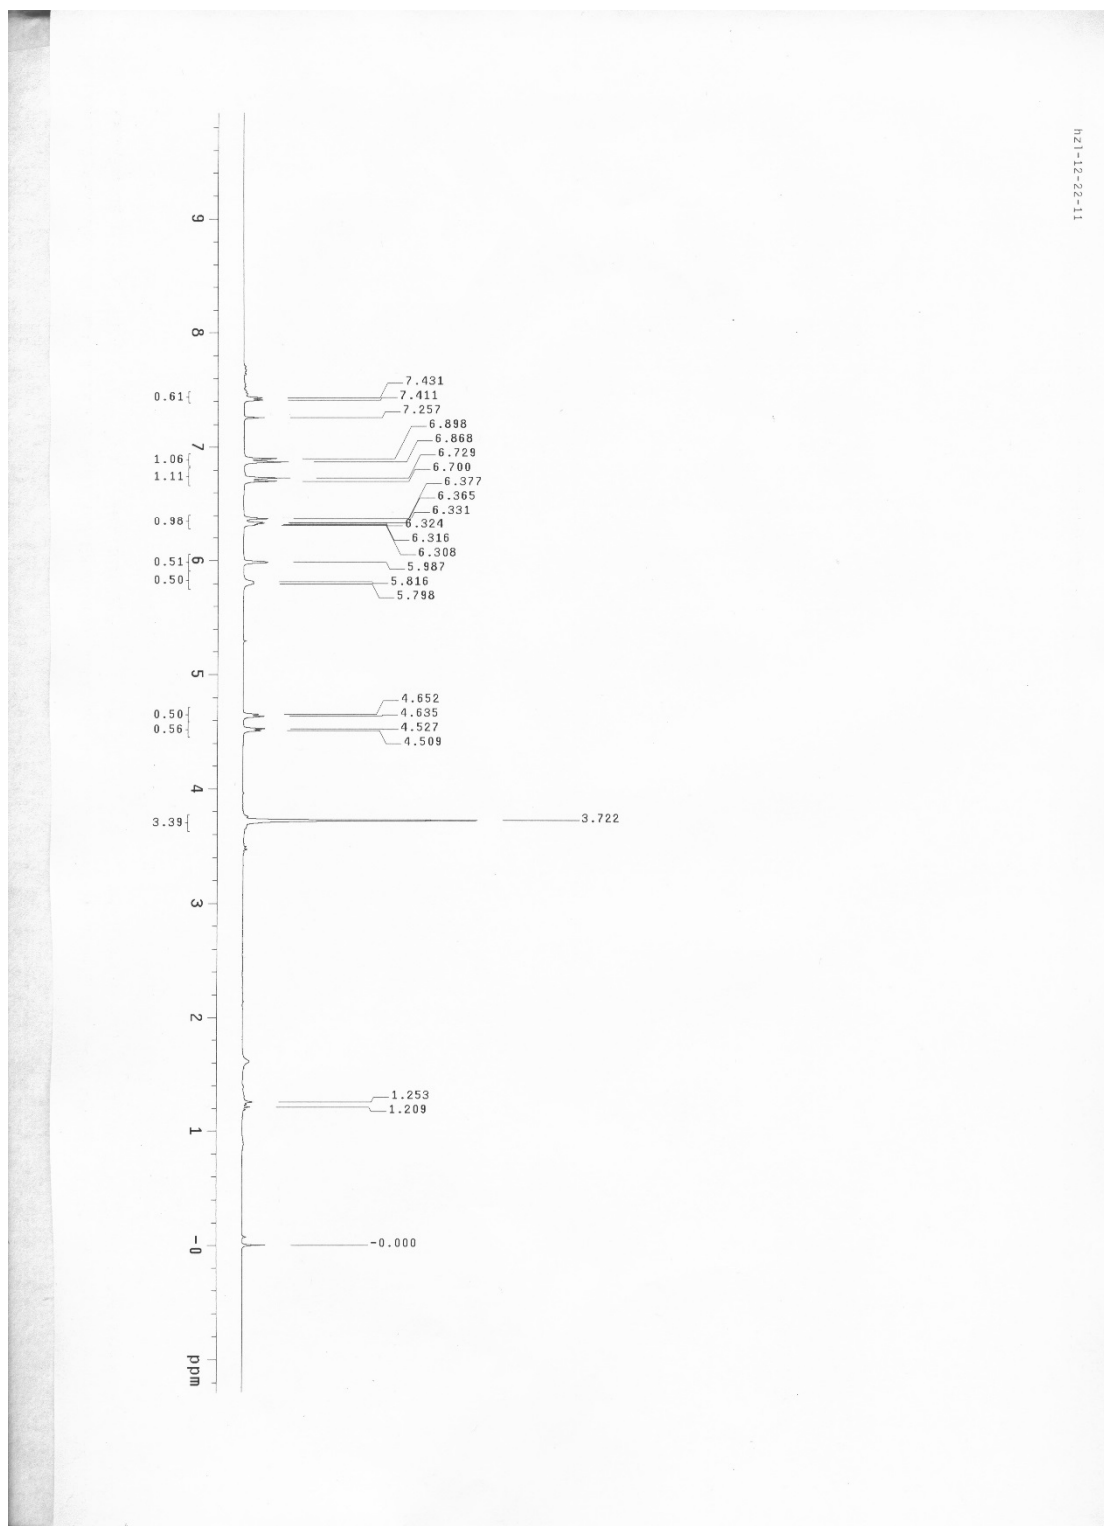

C13-H27-12-22-1

Solvent: CDCl<sub>3</sub>  
Nucleon: 125 MHz  
Mercury-300B "mercury300"  
Relax. delay 1.000 sec  
Pulse: 28.0 degrees  
Acq. time: 0.500 sec  
NUC1: 13C, 125.000 MHz  
224 repetitions  
OBSERVE: C13, 75.452851 MHz  
DECOUPLE: H1, 300.0815297 MHz  
P1: 0.120000 sec  
on during acquisition  
off during delay  
WALTZ-16 modulated  
D1: 1.000000 sec  
Time: 0.000000 sec  
Time: 0.000000 sec  
FT size 32768  
Total time 4 hr, 48 min, 8 sec

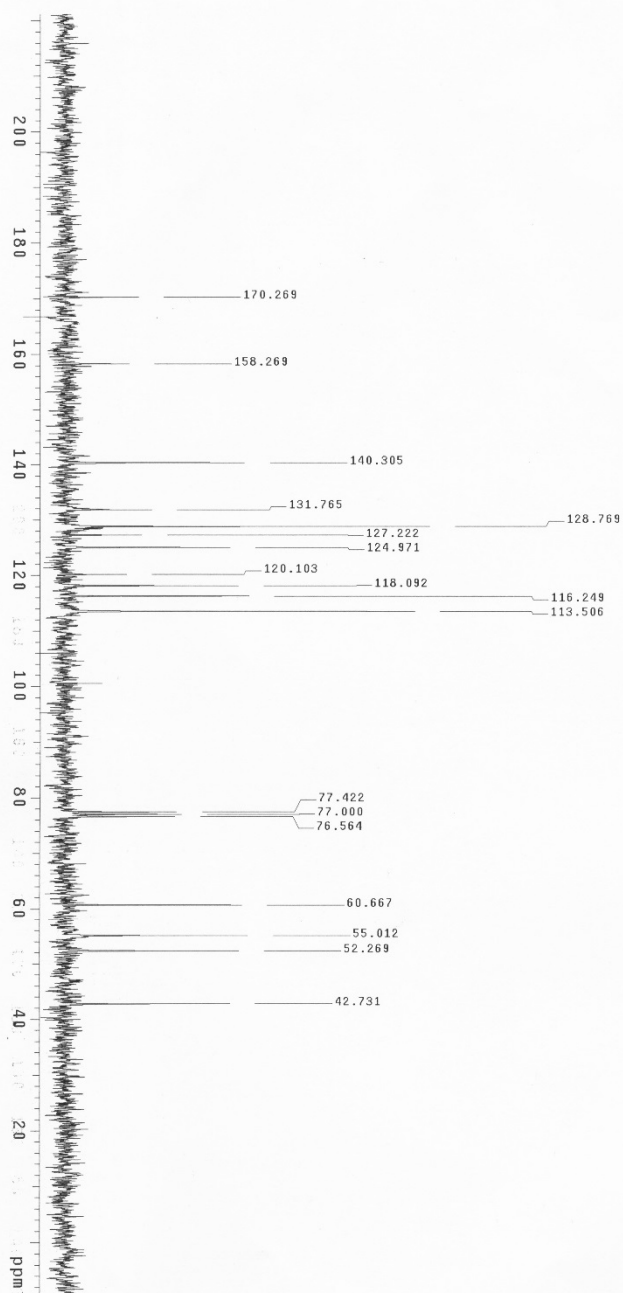

## V. HPLC Chromatograms

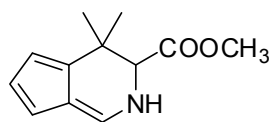

(3a)

Data File D:\LC\DATA\H2L\H2L-8-79\H2L-8-79-2 2013-04-13 09-39-20\002-0101.D  
Sample Name: H2L-8-79

```
=====
Acq. Operator   : TMC                      Seq. Line :    1
Acq. Instrument : Instrument 1              Location  : Vial 2
Injection Date  : 4/14/2013 12:40:16 AM     Inj       :    1
                                           Inj Volume: 5 µl
Acq. Method     : D:\LC\DATA\H2L\H2L-8-79\H2L-8-79-2 2013-04-13 09-39-20\ASH-10-90-10ML-
                  220NM.M
Last changed    : 1/14/2012 6:45:00 AM by H2L
Analysis Method : D:\LC\DATA\H2L\H2L-8-79\H2L-8-79-2 2013-04-13 09-39-20\002-0101.D\A.M (
                  ASH-10-90-10ML-220NM.M)
Last changed    : 10/21/2014 4:32:38 PM by HR
                  (modified after loading)
=====
```

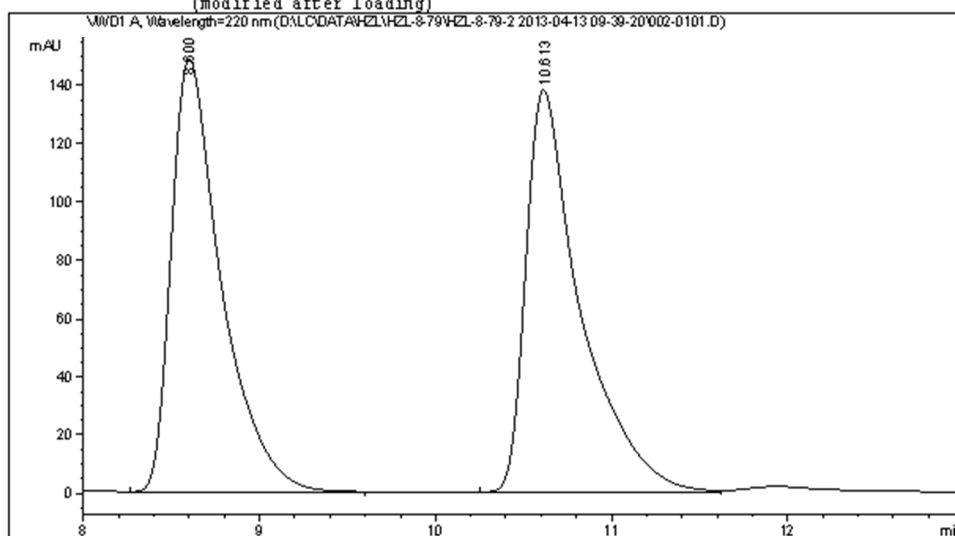

### Area Percent Report

```
=====
Sorted By      : Signal
Multiplier     : 1.0000
Dilution       : 1.0000
Use Multiplier & Dilution Factor with ISTDs
=====
```

Signal 1: VMD1 A, Wavelength=220 nm

| Peak # | RetTime [min] | Type | Width [min] | Area mAU   | Height [mAU] | Area %  |
|--------|---------------|------|-------------|------------|--------------|---------|
| 1      | 8.600         | VB   | 0.2919      | 2939.99219 | 148.67641    | 49.6720 |
| 2      | 10.613        | BV   | 0.3099      | 2978.82544 | 138.08510    | 50.3280 |

Totals : 5918.81763 286.76151

Data File D:\LC\DATA\H2L\H2L-8-80\H2L-8-80A 2013-04-13 15-55-44\041-0101.D  
Sample Name: H2L-8-80A

```
=====
Acq. Operator   : TMC                      Seq. Line :    1
Acq. Instrument : Instrument 1              Location  : Vial 41
Injection Date  : 4/14/2013 6:57:01 AM      Inj       :    1
                                           Inj Volume: 5 µl
Acq. Method     : D:\LC\DATA\H2L\H2L-8-80\H2L-8-80A 2013-04-13 15-55-44\ASH-10-90-10ML-
220NM-15MIN.M
Last changed    : 8/6/2012 2:28:33 AM by THL
Analysis Method : D:\LC\DATA\H2L\H2L-8-80\H2L-8-80A 2013-04-13 15-55-44\041-0101.D\DA.M (
ASH-10-90-10ML-220NM-15MIN.M)
Last changed    : 10/23/2014 5:07:14 PM by HR
(modified after loading)
=====
```

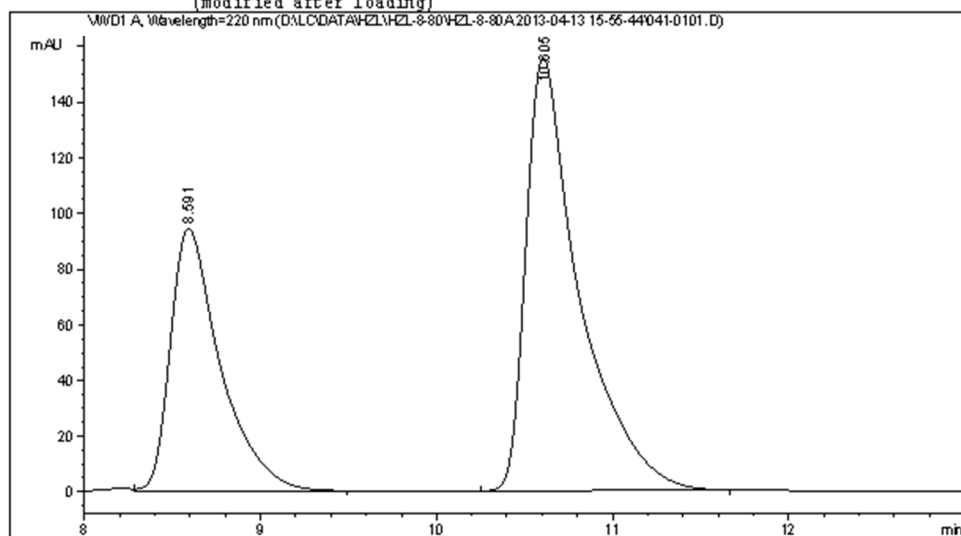

=====  
Area Percent Report  
=====

```
Sorted By      :      Signal
Multiplier     :      1.0000
Dilution       :      1.0000
Use Multiplier & Dilution Factor with ISTDs
```

Signal 1: WVD1 A, Wavelength=220 nm

| Peak # | RetTime [min] | Type | Width [min] | Area mAU   | Height [mAU] | Area %  |
|--------|---------------|------|-------------|------------|--------------|---------|
| 1      | 8.591         | VB   | 0.2906      | 1859.17334 | 94.54090     | 36.1726 |
| 2      | 10.605        | BB   | 0.3029      | 3280.55444 | 155.51765    | 63.8274 |

Totals :                    5139.72778   250.05856

Instrument 1 10/23/2014 5:07:26 PM HR

Page 1 of 1
